# Supplementary material for: Mechanism of Smilax china L. in the treatment of intrauterine adhesions based on network pharmacology, molecular docking and experimental validation
Source: BMC Complement Med Ther. 2024 Apr 5;24:150. doi: 10.1186/s12906-024-04414-4 (PMC10996135; doi:10.1186/s12906-024-04414-4)
Supplement: Supplementary file 3 — Supplementary Material 3 [file 12906_2024_4414_MOESM3_ESM.xlsx]

## Sheet: sheet1
Supplementary Table 3 Information of IUA disease targets
NO.	Gene Symbol	Protein name	Database sources	Relevance score
1	POU5F1P3	POU class 5 homeobox 1 pseudogene 3	DisGeNet	-
2	ITGB2	Integrin Subunit Beta 2	GeneCard	103.07
3	FERMT3	FERM Domain Containing Kindlin 3	GeneCard	60.695
4	ICAM1	Intercellular Adhesion Molecule 1	GeneCard	57.8113
5	VCAM1	Vascular Cell Adhesion Molecule 1	GeneCard	51.3776
6	SLC35C1	Solute Carrier Family 35 Member C1	GeneCard	36.2783
7	SELE	Selectin E	GeneCard	35.7558
8	CDKN1C	Cyclin Dependent Kinase Inhibitor 1C	GeneCard	34.0148
9	ICAM2	Intercellular Adhesion Molecule 2	GeneCard	32.1142
10	PECAM1	Platelet And Endothelial Cell Adhesion Molecule 1	GeneCard	30.0529
11	ITGA4	Integrin Subunit Alpha 4	GeneCard	30.0113
12	ITGAL	Integrin Subunit Alpha L	GeneCard	29.7051
13	POLE	DNA Polymerase Epsilon, Catalytic Subunit	GeneCard	28.8353
14	SELP	Selectin P	GeneCard	28.4445
15	SELL	Selectin L	GeneCard	26.9377
16	L1CAM	L1 Cell Adhesion Molecule	GeneCard	25.2903
17	TNF	Tumor Necrosis Factor	GeneCard	22.9803
18	ITGAM	Integrin Subunit Alpha M	GeneCard	22.8251
19	JAM3	Junctional Adhesion Molecule 3	GeneCard	22.6559
20	CDH2	Cadherin 2	GeneCard	22.5314
21	MCAM	Melanoma Cell Adhesion Molecule	GeneCard	22.1735
22	CDH1	Cadherin 1	GeneCard	21.662
23	SRC	SRC Proto-Oncogene, Non-Receptor Tyrosine Kinase	GeneCard	21.2345
24	JAM2	Junctional Adhesion Molecule 2	GeneCard	20.45
25	ITGB3	Integrin Subunit Beta 3	GeneCard	20.2356
26	FN1	Fibronectin 1	GeneCard	20.1706
27	DSCAM	DS Cell Adhesion Molecule	GeneCard	19.6139
28	IGF1	Insulin Like Growth Factor 1	GeneCard	19.5001
29	VWF	Von Willebrand Factor	GeneCard	18.7528
30	TLN1	Talin 1	GeneCard	18.1774
31	ITGAX	Integrin Subunit Alpha X	GeneCard	17.9691
32	ITGAV	Integrin Subunit Alpha V	GeneCard	17.7436
33	CTNNB1	Catenin Beta 1	GeneCard	17.7339
34	FERMT1	FERM Domain Containing Kindlin 1	GeneCard	17.7136
35	ADGRG1	Adhesion G Protein-Coupled Receptor G1	GeneCard	17.6094
36	MAPK1	Mitogen-Activated Protein Kinase 1	GeneCard	17.3396
37	FERMT2	FERM Domain Containing Kindlin 2	GeneCard	17.277
38	ADGRG6	Adhesion G Protein-Coupled Receptor G6	GeneCard	16.8755
39	CDON	Cell Adhesion Associated, Oncogene Regulated	GeneCard	16.8682
40	IGF1R	Insulin Like Growth Factor 1 Receptor	GeneCard	16.7316
41	IL1B	Interleukin 1 Beta	GeneCard	16.3176
42	HEPACAM	Hepatic And Glial Cell Adhesion Molecule	GeneCard	16.2635
43	IGF2	Insulin Like Growth Factor 2	GeneCard	16.1753
44	VTN	Vitronectin	GeneCard	16.1123
45	IL6	Interleukin 6	GeneCard	16.0428
46	JUP	Junction Plakoglobin	GeneCard	16.0347
47	INS	Insulin	GeneCard	15.8203
48	VEGFA	Vascular Endothelial Growth Factor A	GeneCard	15.6182
49	GINS1	GINS Complex Subunit 1	GeneCard	15.4215
50	CTNNA1	Catenin Alpha 1	GeneCard	14.3362
51	CD36	CD36 Molecule	GeneCard	14.175
52	NPHS1	NPHS1 Adhesion Molecule, Nephrin	GeneCard	14.1336
53	KIRREL3	Kirre Like Nephrin Family Adhesion Molecule 3	GeneCard	13.9287
54	CTNND1	Catenin Delta 1	GeneCard	13.8027
55	CYP1B1	Cytochrome P450 Family 1 Subfamily B Member 1	GeneCard	13.649
56	APBB1IP	Amyloid Beta Precursor Protein Binding Family B Member 1 Interacting Protein	GeneCard	13.6256
57	OCLN	Occludin	GeneCard	13.5436
58	ITGAD	Integrin Subunit Alpha D	GeneCard	13.5046
59	ITGA6	Integrin Subunit Alpha 6	GeneCard	13.3341
60	ITGA3	Integrin Subunit Alpha 3	GeneCard	13.3341
61	CXCL8	C-X-C Motif Chemokine Ligand 8	GeneCard	13.1135
62	BOC	BOC Cell Adhesion Associated, Oncogene Regulated	GeneCard	12.8585
63	RAC1	Rac Family Small GTPase 1	GeneCard	12.7589
64	IFNG	Interferon Gamma	GeneCard	12.696
65	ADGRG7	Adhesion G Protein-Coupled Receptor G7	GeneCard	12.637
66	CD209	CD209 Molecule	GeneCard	12.5808
67	PIK3R1	Phosphoinositide-3-Kinase Regulatory Subunit 1	GeneCard	12.5375
68	RHOA	Ras Homolog Family Member A	GeneCard	12.3682
69	CSF3	Colony Stimulating Factor 3	GeneCard	12.3552
70	INSR	Insulin Receptor	GeneCard	12.1297
71	ZYX	Zyxin	GeneCard	11.8715
72	RASSF5	Ras Association Domain Family Member 5	GeneCard	11.7953
73	COL1A1	Collagen Type I Alpha 1 Chain	GeneCard	11.6788
74	DSPP	Dentin Sialophosphoprotein	GeneCard	11.5828
75	VASP	Vasodilator Stimulated Phosphoprotein	GeneCard	11.3984
76	RASGRP2	RAS Guanyl Releasing Protein 2	GeneCard	11.3492
77	RAC2	Rac Family Small GTPase 2	GeneCard	11.2752
78	FOXC1	Forkhead Box C1	GeneCard	11.2628
79	TGFB1	Transforming Growth Factor Beta 1	GeneCard	11.2537
80	ITGA1	Integrin Subunit Alpha 1	GeneCard	11.1728
81	CDH5	Cadherin 5	GeneCard	11.0481
82	DKC1	Dyskerin Pseudouridine Synthase 1	GeneCard	11.035
83	FOXE3	Forkhead Box E3	GeneCard	11.0315
84	ITGB4	Integrin Subunit Beta 4	GeneCard	10.9916
85	AKT1	AKT Serine/Threonine Kinase 1	GeneCard	10.9723
86	THBS1	Thrombospondin 1	GeneCard	10.8455
87	CEACAMP8	CEA Cell Adhesion Molecule Pseudogene 8	GeneCard	10.6743
88	PTPN11	Protein Tyrosine Phosphatase Non-Receptor Type 11	GeneCard	10.6529
89	CDH3	Cadherin 3	GeneCard	10.597
90	CDH3	Cadherin 3	GeneCard	10.597
91	ENG	Endoglin	GeneCard	10.552
92	CRK	CRK Proto-Oncogene, Adaptor Protein	GeneCard	10.4933
93	COL1A2	Collagen Type I Alpha 2 Chain	GeneCard	10.4754
94	PIK3CG	Phosphatidylinositol-4,5-Bisphosphate 3-Kinase Catalytic Subunit Gamma	GeneCard	10.4246
95	DSP	Desmoplakin	GeneCard	10.3017
96	NEDD9	Neural Precursor Cell Expressed, Developmentally Down-Regulated 9	GeneCard	10.2376
97	CRP	C-Reactive Protein	GeneCard	10.2369
98	LMNA	Lamin A/C	GeneCard	10.2084
99	EGFR	Epidermal Growth Factor Receptor	GeneCard	10.1602
100	SERPINE1	Serpin Family E Member 1	GeneCard	10.149
101	ACTA1	Actin Alpha 1, Skeletal Muscle	GeneCard	10.1038
102	NFASC	Neurofascin	GeneCard	10.0332
103	ITGA7	Integrin Subunit Alpha 7	GeneCard	9.89375
104	IL17A	Interleukin 17A	GeneCard	9.87825
105	HMGA2	High Mobility Group AT-Hook 2	GeneCard	9.87769
106	NOS3	Nitric Oxide Synthase 3	GeneCard	9.8548
107	ABL1	ABL Proto-Oncogene 1, Non-Receptor Tyrosine Kinase	GeneCard	9.8485
108	RAPSN	Receptor Associated Protein Of The Synapse	GeneCard	9.83372
109	MMP1	Matrix Metallopeptidase 1	GeneCard	9.81806
110	KCNQ1	Potassium Voltage-Gated Channel Subfamily Q Member 1	GeneCard	9.78211
111	CNTN1	Contactin 1	GeneCard	9.77512
112	GPKOW	G-Patch Domain And KOW Motifs	GeneCard	9.76938
113	PITX2	Paired Like Homeodomain 2	GeneCard	9.71844
114	MCM4	Minichromosome Maintenance Complex Component 4	GeneCard	9.69741
115	ITGB5	Integrin Subunit Beta 5	GeneCard	9.65355
116	KDR	Kinase Insert Domain Receptor	GeneCard	9.61435
117	CCL2	C-C Motif Chemokine Ligand 2	GeneCard	9.59582
118	MMP2	Matrix Metallopeptidase 2	GeneCard	9.5664
119	PSAT1	Phosphoserine Aminotransferase 1	GeneCard	9.39094
120	CYBB	Cytochrome B-245 Beta Chain	GeneCard	9.28311
121	PLAUR	Plasminogen Activator, Urokinase Receptor	GeneCard	9.27687
122	MMP9	Matrix Metallopeptidase 9	GeneCard	9.26981
123	EGF	Epidermal Growth Factor	GeneCard	9.26598
124	FLT1	Fms Related Receptor Tyrosine Kinase 1	GeneCard	9.26252
125	PRKCA	Protein Kinase C Alpha	GeneCard	9.24232
126	SKIC2	SKI2 Subunit Of Superkiller Complex	GeneCard	9.20634
127	WAS	WASP Actin Nucleation Promoting Factor	GeneCard	9.10317
128	CD47	CD47 Molecule	GeneCard	9.0912
129	CCN2	Cellular Communication Network Factor 2	GeneCard	9.06406
130	CDC42	Cell Division Cycle 42	GeneCard	8.99303
131	ADRM1	ADRM1 26S Proteasome Ubiquitin Receptor	GeneCard	8.94888
132	GP1BA	Glycoprotein Ib Platelet Subunit Alpha	GeneCard	8.92707
133	ROCK1	Rho Associated Coiled-Coil Containing Protein Kinase 1	GeneCard	8.91403
134	SPP1	Secreted Phosphoprotein 1	GeneCard	8.87479
135	SIGLEC5	Sialic Acid Binding Ig Like Lectin 5	GeneCard	8.86481
136	PIP5K1C	Phosphatidylinositol-4-Phosphate 5-Kinase Type 1 Gamma	GeneCard	8.84364
137	CXCL12	C-X-C Motif Chemokine Ligand 12	GeneCard	8.80178
138	SHC1	SHC Adaptor Protein 1	GeneCard	8.77195
139	CCR6	C-C Motif Chemokine Receptor 6	GeneCard	8.761
140	ITGB1BP1	Integrin Subunit Beta 1 Binding Protein 1	GeneCard	8.74683
141	PCNT	Pericentrin	GeneCard	8.7434
142	PLAG1	PLAG1 Zinc Finger	GeneCard	8.71278
143	PTEN	Phosphatase And Tensin Homolog	GeneCard	8.66883
144	PCDH12	Protocadherin 12	GeneCard	8.59067
145	CXCR2	C-X-C Motif Chemokine Receptor 2	GeneCard	8.57858
146	DSG3	Desmoglein 3	GeneCard	8.52707
147	TERT	Telomerase Reverse Transcriptase	GeneCard	8.5032
148	ERCC2	ERCC Excision Repair 2, TFIIH Core Complex Helicase Subunit	GeneCard	8.50262
149	ESR1	Estrogen Receptor 1	GeneCard	8.37831
150	IL1A	Interleukin 1 Alpha	GeneCard	8.35195
151	PAX6	Paired Box 6	GeneCard	8.34768
152	TEK	TEK Receptor Tyrosine Kinase	GeneCard	8.31933
153	IL10	Interleukin 10	GeneCard	8.31767
154	CD9	CD9 Molecule	GeneCard	8.31121
155	ORC4	Origin Recognition Complex Subunit 4	GeneCard	8.30361
156	GRB2	Growth Factor Receptor Bound Protein 2	GeneCard	8.30347
157	CD4	CD4 Molecule	GeneCard	8.27489
158	ELN	Elastin	GeneCard	8.26468
159	RELN	Reelin	GeneCard	8.25371
160	CDC6	Cell Division Cycle 6	GeneCard	8.25221
161	F2	Coagulation Factor II, Thrombin	GeneCard	8.24403
162	IL4	Interleukin 4	GeneCard	8.23669
163	MTHFR	Methylenetetrahydrofolate Reductase	GeneCard	8.22632
164	PLAU	Plasminogen Activator, Urokinase	GeneCard	8.18189
165	TBCE	Tubulin Folding Cofactor E	GeneCard	8.03885
166	THY1	Thy-1 Cell Surface Antigen	GeneCard	8.02994
167	ABCC8	ATP Binding Cassette Subfamily C Member 8	GeneCard	7.98754
168	TGM1	Transglutaminase 1	GeneCard	7.96577
169	CCN1	Cellular Communication Network Factor 1	GeneCard	7.96076
170	PHGDH	Phosphoglycerate Dehydrogenase	GeneCard	7.94908
171	DOK7	Docking Protein 7	GeneCard	7.90912
172	TP53	Tumor Protein P53	GeneCard	7.87399
173	CSF1	Colony Stimulating Factor 1	GeneCard	7.87069
174	RYR1	Ryanodine Receptor 1	GeneCard	7.83698
175	GP1BB	Glycoprotein Ib Platelet Subunit Beta	GeneCard	7.82426
176	GTF2H5	General Transcription Factor IIH Subunit 5	GeneCard	7.80779
177	FLNA	Filamin A	GeneCard	7.79892
178	ZMPSTE24	Zinc Metallopeptidase STE24	GeneCard	7.79466
179	CDC45	Cell Division Cycle 45	GeneCard	7.77448
180	CLASP1	Cytoplasmic Linker Associated Protein 1	GeneCard	7.75251
181	DPP4	Dipeptidyl Peptidase 4	GeneCard	7.74824
182	GCK	Glucokinase	GeneCard	7.72812
183	WDR4	WD Repeat Domain 4	GeneCard	7.72453
184	CRKL	CRK Like Proto-Oncogene, Adaptor Protein	GeneCard	7.68693
185	KCNJ11	Potassium Inwardly Rectifying Channel Subfamily J Member 11	GeneCard	7.6835
186	PYCR1	Pyrroline-5-Carboxylate Reductase 1	GeneCard	7.64096
187	ERCC6	ERCC Excision Repair 6, Chromatin Remodeling Factor	GeneCard	7.62355
188	P4HB	Prolyl 4-Hydroxylase Subunit Beta	GeneCard	7.61103
189	SKIC3	SKI3 Subunit Of Superkiller Complex	GeneCard	7.60841
190	PGR	Progesterone Receptor	GeneCard	7.59933
191	MMP3	Matrix Metallopeptidase 3	GeneCard	7.55669
192	PDX1	Pancreatic And Duodenal Homeobox 1	GeneCard	7.49176
193	EXOSC3	Exosome Component 3	GeneCard	7.46362
194	GMNN	Geminin DNA Replication Inhibitor	GeneCard	7.45861
195	PARVB	Parvin Beta	GeneCard	7.42089
196	ADAMTSL1	ADAMTS Like 1	GeneCard	7.38262
197	LPP	LIM Domain Containing Preferred Translocation Partner In Lipoma	GeneCard	7.37495
198	ALB	Albumin	GeneCard	7.34891
199	ADAM10	ADAM Metallopeptidase Domain 10	GeneCard	7.34503
200	DSG1	Desmoglein 1	GeneCard	7.32629
201	IGFBP1	Insulin Like Growth Factor Binding Protein 1	GeneCard	7.31289
202	CX3CR1	C-X3-C Motif Chemokine Receptor 1	GeneCard	7.30218
203	PDGFRB	Platelet Derived Growth Factor Receptor Beta	GeneCard	7.29548
204	TINF2	TERF1 Interacting Nuclear Factor 2	GeneCard	7.29124
205	DOCK8	Dedicator Of Cytokinesis 8	GeneCard	7.29112
206	SLC4A11	Solute Carrier Family 4 Member 11	GeneCard	7.26717
207	PPIB	Peptidylprolyl Isomerase B	GeneCard	7.25549
208	CX3CL1	C-X3-C Motif Chemokine Ligand 1	GeneCard	7.25327
209	RMI2	RecQ Mediated Genome Instability 2	GeneCard	7.25286
210	SPARC	Secreted Protein Acidic And Cysteine Rich	GeneCard	7.24839
211	GRHL2	Grainyhead Like Transcription Factor 2	GeneCard	7.23351
212	LGALS3	Galectin 3	GeneCard	7.19153
213	CNTNAP1	Contactin Associated Protein 1	GeneCard	7.16829
214	BUB1B	BUB1 Mitotic Checkpoint Serine/Threonine Kinase B	GeneCard	7.13697
215	AGK	Acylglycerol Kinase	GeneCard	7.11042
216	LAMA5	Laminin Subunit Alpha 5	GeneCard	7.10246
217	NRXN1	Neurexin 1	GeneCard	7.06883
218	ACP1	Acid Phosphatase 1	GeneCard	7.02946
219	FBLN5	Fibulin 5	GeneCard	7.0044
220	IBSP	Integrin Binding Sialoprotein	GeneCard	6.99704
221	PIEZO2	Piezo Type Mechanosensitive Ion Channel Component 2	GeneCard	6.99634
222	CDH23	Cadherin Related 23	GeneCard	6.9899
223	CXCR4	C-X-C Motif Chemokine Receptor 4	GeneCard	6.973
224	STAT3	Signal Transducer And Activator Of Transcription 3	GeneCard	6.95751
225	F5	Coagulation Factor V	GeneCard	6.94922
226	KIF14	Kinesin Family Member 14	GeneCard	6.94369
227	ATR	ATR Serine/Threonine Kinase	GeneCard	6.94245
228	ATR	ATR Serine/Threonine Kinase	GeneCard	6.94245
229	FGF2	Fibroblast Growth Factor 2	GeneCard	6.94034
230	MCM5	Minichromosome Maintenance Complex Component 5	GeneCard	6.9039
231	SIGLEC7	Sialic Acid Binding Ig Like Lectin 7	GeneCard	6.90278
232	SFXN4	Sideroflexin 4	GeneCard	6.90153
233	H19	H19 Imprinted Maternally Expressed Transcript	GeneCard	6.89703
234	MUSK	Muscle Associated Receptor Tyrosine Kinase	GeneCard	6.89366
235	BCL2	BCL2 Apoptosis Regulator	GeneCard	6.86756
236	CCL5	C-C Motif Chemokine Ligand 5	GeneCard	6.85201
237	TIMP1	TIMP Metallopeptidase Inhibitor 1	GeneCard	6.84185
238	ADAM15	ADAM Metallopeptidase Domain 15	GeneCard	6.80556
239	IL2	Interleukin 2	GeneCard	6.80333
240	CTNND2	Catenin Delta 2	GeneCard	6.77662
241	FBN1	Fibrillin 1	GeneCard	6.75579
242	SERPINF1	Serpin Family F Member 1	GeneCard	6.75157
243	CNTN4	Contactin 4	GeneCard	6.72162
244	MAPK14	Mitogen-Activated Protein Kinase 14	GeneCard	6.7031
245	ERBB2	Erb-B2 Receptor Tyrosine Kinase 2	GeneCard	6.66912
246	FGFR2	Fibroblast Growth Factor Receptor 2	GeneCard	6.64964
247	P3H1	Prolyl 3-Hydroxylase 1	GeneCard	6.64903
248	G6PC3	Glucose-6-Phosphatase Catalytic Subunit 3	GeneCard	6.64514
249	RAF1	Raf-1 Proto-Oncogene, Serine/Threonine Kinase	GeneCard	6.62551
250	GLIS3	GLIS Family Zinc Finger 3	GeneCard	6.61986
251	NEB	Nebulin	GeneCard	6.60891
252	CENPJ	Centromere Protein J	GeneCard	6.60077
253	MYOD1	Myogenic Differentiation 1	GeneCard	6.58272
254	ASPM	Assembly Factor For Spindle Microtubules	GeneCard	6.58015
255	NSUN2	NOP2/Sun RNA Methyltransferase 2	GeneCard	6.57627
256	HSPG2	Heparan Sulfate Proteoglycan 2	GeneCard	6.56602
257	CD99	CD99 Molecule (Xg Blood Group)	GeneCard	6.56462
258	IGFBP3	Insulin Like Growth Factor Binding Protein 3	GeneCard	6.5638
259	RET	Ret Proto-Oncogene	GeneCard	6.55906
260	HDAC6	Histone Deacetylase 6	GeneCard	6.55083
261	CHRND	Cholinergic Receptor Nicotinic Delta Subunit	GeneCard	6.53566
262	MAP2K1	Mitogen-Activated Protein Kinase Kinase 1	GeneCard	6.52758
263	FGFR1	Fibroblast Growth Factor Receptor 1	GeneCard	6.51445
264	HSP90AA1	Heat Shock Protein 90 Alpha Family Class A Member 1	GeneCard	6.49755
265	ADIPOQ	Adiponectin, C1Q And Collagen Domain Containing	GeneCard	6.49325
266	FGR	FGR Proto-Oncogene, Src Family Tyrosine Kinase	GeneCard	6.49197
267	SMC1A	Structural Maintenance Of Chromosomes 1A	GeneCard	6.4554
268	COL4A1	Collagen Type IV Alpha 1 Chain	GeneCard	6.42942
269	MRPS28	Mitochondrial Ribosomal Protein S28	GeneCard	6.42087
270	CLEC4M	C-Type Lectin Domain Family 4 Member M	GeneCard	6.40148
271	ANGPT1	Angiopoietin 1	GeneCard	6.39918
272	LEP	Leptin	GeneCard	6.35623
273	BMP6	Bone Morphogenetic Protein 6	GeneCard	6.35551
274	F3	Coagulation Factor III, Tissue Factor	GeneCard	6.3427
275	RPL11	Ribosomal Protein L11	GeneCard	6.33824
276	MCM7	Minichromosome Maintenance Complex Component 7	GeneCard	6.31464
277	BRAF	B-Raf Proto-Oncogene, Serine/Threonine Kinase	GeneCard	6.28727
278	LIG4	DNA Ligase 4	GeneCard	6.26028
279	NIPBL	NIPBL Cohesin Loading Factor	GeneCard	6.23173
280	RPS19	Ribosomal Protein S19	GeneCard	6.2215
281	PLAT	Plasminogen Activator, Tissue Type	GeneCard	6.21784
282	EDN1	Endothelin 1	GeneCard	6.21
283	TRPM3	Transient Receptor Potential Cation Channel Subfamily M Member 3	GeneCard	6.18911
284	ATP8B1	ATPase Phospholipid Transporting 8B1	GeneCard	6.15487
285	NCK1	NCK Adaptor Protein 1	GeneCard	6.14964
286	TRO	Trophinin	GeneCard	6.1485
287	CASP3	Caspase 3	GeneCard	6.13443
288	ADAM17	ADAM Metallopeptidase Domain 17	GeneCard	6.13295
289	CENPE	Centromere Protein E	GeneCard	6.11189
290	GP9	Glycoprotein IX Platelet	GeneCard	6.10707
291	ADAM12	ADAM Metallopeptidase Domain 12	GeneCard	6.10376
292	KMT2A	Lysine Methyltransferase 2A	GeneCard	6.09101
293	CNTN6	Contactin 6	GeneCard	6.08971
294	PLAGL1	PLAG1 Like Zinc Finger 1	GeneCard	6.08533
295	RAC3	Rac Family Small GTPase 3	GeneCard	6.08064
296	PDGFB	Platelet Derived Growth Factor Subunit B	GeneCard	6.07249
297	FKBP10	FKBP Prolyl Isomerase 10	GeneCard	6.0693
298	CALCA	Calcitonin Related Polypeptide Alpha	GeneCard	6.05987
299	WNT1	Wnt Family Member 1	GeneCard	6.04882
300	BGLAP	Bone Gamma-Carboxyglutamate Protein	GeneCard	6.04467
301	BVES	Blood Vessel Epicardial Substance	GeneCard	6.03707
302	UQCC2	Ubiquinol-Cytochrome C Reductase Complex Assembly Factor 2	GeneCard	6.01961
303	RIPK4	Receptor Interacting Serine/Threonine Kinase 4	GeneCard	6.01344
304	RRAS	RAS Related	GeneCard	6.01027
305	TFAM	Transcription Factor A, Mitochondrial	GeneCard	6.00511
306	BMP1	Bone Morphogenetic Protein 1	GeneCard	5.99749
307	JUN	Jun Proto-Oncogene, AP-1 Transcription Factor Subunit	GeneCard	5.9783
308	APC	APC Regulator Of WNT Signaling Pathway	GeneCard	5.97828
309	NTM	Neurotrimin	GeneCard	5.96536
310	FGB	Fibrinogen Beta Chain	GeneCard	5.96175
311	ORC1	Origin Recognition Complex Subunit 1	GeneCard	5.96033
312	CEP152	Centrosomal Protein 152	GeneCard	5.95051
313	AKT2	AKT Serine/Threonine Kinase 2	GeneCard	5.94676
314	GJA1	Gap Junction Protein Alpha 1	GeneCard	5.92831
315	FLNB	Filamin B	GeneCard	5.90606
316	DYRK1A	Dual Specificity Tyrosine Phosphorylation Regulated Kinase 1A	GeneCard	5.90329
317	RBBP8	RB Binding Protein 8, Endonuclease	GeneCard	5.89952
318	CD63	CD63 Molecule	GeneCard	5.89858
319	MKRN3	Makorin Ring Finger Protein 3	GeneCard	5.89391
320	PRKCE	Protein Kinase C Epsilon	GeneCard	5.84748
321	BCAP31	B Cell Receptor Associated Protein 31	GeneCard	5.83888
322	MET	MET Proto-Oncogene, Receptor Tyrosine Kinase	GeneCard	5.82727
323	PPARG	Peroxisome Proliferator Activated Receptor Gamma	GeneCard	5.81635
324	ACD	ACD Shelterin Complex Subunit And Telomerase Recruitment Factor	GeneCard	5.80583
325	RAD21	RAD21 Cohesin Complex Component	GeneCard	5.80307
326	TLR4	Toll Like Receptor 4	GeneCard	5.80215
327	THBS2	Thrombospondin 2	GeneCard	5.79468
328	PLK4	Polo Like Kinase 4	GeneCard	5.77237
329	LGALS1	Galectin 1	GeneCard	5.76917
330	PARN	Poly(A)-Specific Ribonuclease	GeneCard	5.76352
331	CLMP	CXADR Like Membrane Protein	GeneCard	5.7521
332	STN1	STN1 Subunit Of CST Complex	GeneCard	5.74625
333	STN1	STN1 Subunit Of CST Complex	GeneCard	5.74625
334	SMC3	Structural Maintenance Of Chromosomes 3	GeneCard	5.73963
335	MESD	Mesoderm Development LRP Chaperone	GeneCard	5.73536
336	GNRH1	Gonadotropin Releasing Hormone 1	GeneCard	5.73069
337	CD40	CD40 Molecule	GeneCard	5.72772
338	ABCB4	ATP Binding Cassette Subfamily B Member 4	GeneCard	5.72084
339	IL1RN	Interleukin 1 Receptor Antagonist	GeneCard	5.68674
340	IRS1	Insulin Receptor Substrate 1	GeneCard	5.67865
341	PHLDA2	Pleckstrin Homology Like Domain Family A Member 2	GeneCard	5.66676
342	ATP5F1A	ATP Synthase F1 Subunit Alpha	GeneCard	5.65055
343	GATA4	GATA Binding Protein 4	GeneCard	5.6376
344	BRD4	Bromodomain Containing 4	GeneCard	5.63682
345	RNF2	Ring Finger Protein 2	GeneCard	5.60937
346	ERCC4	ERCC Excision Repair 4, Endonuclease Catalytic Subunit	GeneCard	5.59292
347	HGF	Hepatocyte Growth Factor	GeneCard	5.58929
348	HGF	Hepatocyte Growth Factor	GeneCard	5.58929
349	LAMB1	Laminin Subunit Beta 1	GeneCard	5.58707
350	DAG1	Dystroglycan 1	GeneCard	5.57559
351	FGF8	Fibroblast Growth Factor 8	GeneCard	5.57235
352	FLT4	Fms Related Receptor Tyrosine Kinase 4	GeneCard	5.56983
353	CRTAP	Cartilage Associated Protein	GeneCard	5.56982
354	CGA	Glycoprotein Hormones, Alpha Polypeptide	GeneCard	5.56106
355	ANOS1	Anosmin 1	GeneCard	5.55537
356	IGHMBP2	Immunoglobulin Mu DNA Binding Protein 2	GeneCard	5.5541
357	MPLKIP	M-Phase Specific PLK1 Interacting Protein	GeneCard	5.55315
358	VIM	Vimentin	GeneCard	5.55313
359	DCHS1	Dachsous Cadherin-Related 1	GeneCard	5.54926
360	SOD1	Superoxide Dismutase 1	GeneCard	5.5405
361	COL3A1	Collagen Type III Alpha 1 Chain	GeneCard	5.53838
362	PLOD3	Procollagen-Lysine,2-Oxoglutarate 5-Dioxygenase 3	GeneCard	5.53775
363	TCTN3	Tectonic Family Member 3	GeneCard	5.5349
364	ALDH18A1	Aldehyde Dehydrogenase 18 Family Member A1	GeneCard	5.52364
365	NT5E	5'-Nucleotidase Ecto	GeneCard	5.52216
366	PTPRC	Protein Tyrosine Phosphatase Receptor Type C	GeneCard	5.52076
367	IGFBP7	Insulin Like Growth Factor Binding Protein 7	GeneCard	5.51268
368	MYH3	Myosin Heavy Chain 3	GeneCard	5.51214
369	HIF1A	Hypoxia Inducible Factor 1 Subunit Alpha	GeneCard	5.5062
370	EP300	E1A Binding Protein P300	GeneCard	5.49905
371	CSF2	Colony Stimulating Factor 2	GeneCard	5.4666
372	OBSL1	Obscurin Like Cytoskeletal Adaptor 1	GeneCard	5.45772
373	PTGS2	Prostaglandin-Endoperoxide Synthase 2	GeneCard	5.45615
374	TRIP13	Thyroid Hormone Receptor Interactor 13	GeneCard	5.42757
375	FARSB	Phenylalanyl-TRNA Synthetase Subunit Beta	GeneCard	5.40997
376	KDM6A	Lysine Demethylase 6A	GeneCard	5.38708
377	MYOC	Myocilin	GeneCard	5.38567
378	CDH17	Cadherin 17	GeneCard	5.38402
379	EPHB6	EPH Receptor B6	GeneCard	5.37544
380	CNTN5	Contactin 5	GeneCard	5.36248
381	PXDN	Peroxidasin	GeneCard	5.35446
382	NFKB1	Nuclear Factor Kappa B Subunit 1	GeneCard	5.3501
383	LAMB2	Laminin Subunit Beta 2	GeneCard	5.34921
384	NRP1	Neuropilin 1	GeneCard	5.34635
385	IL2RA	Interleukin 2 Receptor Subunit Alpha	GeneCard	5.34281
386	SEC31A	SEC31 Homolog A, COPII Coat Complex Component	GeneCard	5.32085
387	NR5A1	Nuclear Receptor Subfamily 5 Group A Member 1	GeneCard	5.31907
388	BRCA2	BRCA2 DNA Repair Associated	GeneCard	5.31766
389	B3GLCT	Beta 3-Glucosyltransferase	GeneCard	5.30904
390	PI4KA	Phosphatidylinositol 4-Kinase Alpha	GeneCard	5.30115
391	NOS2	Nitric Oxide Synthase 2	GeneCard	5.29568
392	NOS2	Nitric Oxide Synthase 2	GeneCard	5.29568
393	PGF	Placental Growth Factor	GeneCard	5.29263
394	SP7	Sp7 Transcription Factor	GeneCard	5.28154
395	THBD	Thrombomodulin	GeneCard	5.27781
396	BCR	BCR Activator Of RhoGEF And GTPase	GeneCard	5.26954
397	CD34	CD34 Molecule	GeneCard	5.26752
398	CREB3L1	CAMP Responsive Element Binding Protein 3 Like 1	GeneCard	5.26724
399	ERCC8	ERCC Excision Repair 8, CSA Ubiquitin Ligase Complex Subunit	GeneCard	5.25302
400	ARVCF	ARVCF Delta Catenin Family Member	GeneCard	5.22718
401	GNAS	GNAS Complex Locus	GeneCard	5.22476
402	PUF60	Poly(U) Binding Splicing Factor 60	GeneCard	5.22088
403	CLDN3	Claudin 3	GeneCard	5.2201
404	HSD11B2	Hydroxysteroid 11-Beta Dehydrogenase 2	GeneCard	5.2113
405	FAS	Fas Cell Surface Death Receptor	GeneCard	5.19941
406	CUL7	Cullin 7	GeneCard	5.19133
407	NOTCH1	Notch Receptor 1	GeneCard	5.19015
408	PIK3CA	Phosphatidylinositol-4,5-Bisphosphate 3-Kinase Catalytic Subunit Alpha	GeneCard	5.18374
409	ASCC1	Activating Signal Cointegrator 1 Complex Subunit 1	GeneCard	5.16825
410	ANXA5	Annexin A5	GeneCard	5.14682
411	BMP2	Bone Morphogenetic Protein 2	GeneCard	5.13031
412	TNXB	Tenascin XB	GeneCard	5.12574
413	SHBG	Sex Hormone Binding Globulin	GeneCard	5.1115
414	RPL5	Ribosomal Protein L5	GeneCard	5.09562
415	ACTN4	Actinin Alpha 4	GeneCard	5.08528
416	BCS1L	BCS1 Homolog, Ubiquinol-Cytochrome C Reductase Complex Chaperone	GeneCard	5.08333
417	ALG2	ALG2 Alpha-1,3/1,6-Mannosyltransferase	GeneCard	5.08079
418	MPO	Myeloperoxidase	GeneCard	5.07084
419	SERPINC1	Serpin Family C Member 1	GeneCard	5.06384
420	PLEC	Plectin	GeneCard	5.03894
421	F8	Coagulation Factor VIII	GeneCard	5.03844
422	FGFR3	Fibroblast Growth Factor Receptor 3	GeneCard	5.03744
423	GJA5	Gap Junction Protein Alpha 5	GeneCard	5.03348
424	PKD1	Polycystin 1, Transient Receptor Potential Channel Interacting	GeneCard	5.03309
425	ATP6V0A2	ATPase H+ Transporting V0 Subunit A2	GeneCard	5.03162
426	TWIST1	Twist Family BHLH Transcription Factor 1	GeneCard	5.02747
427	OLR1	Oxidized Low Density Lipoprotein Receptor 1	GeneCard	5.02556
428	PTCD3	Pentatricopeptide Repeat Domain 3	GeneCard	5.01583
429	DYNC1I2	Dynein Cytoplasmic 1 Intermediate Chain 2	GeneCard	4.98698
430	FHL2	Four And A Half LIM Domains 2	GeneCard	4.96866
431	SERPINH1	Serpin Family H Member 1	GeneCard	4.94366
432	FANCL	FA Complementation Group L	GeneCard	4.94124
433	FANCL	FA Complementation Group L	GeneCard	4.94124
434	HBB	Hemoglobin Subunit Beta	GeneCard	4.93678
435	APOE	Apolipoprotein E	GeneCard	4.92362
436	ANGPT2	Angiopoietin 2	GeneCard	4.91136
437	FGG	Fibrinogen Gamma Chain	GeneCard	4.91092
438	DNMT3A	DNA Methyltransferase 3 Alpha	GeneCard	4.90413
439	PODXL	Podocalyxin Like	GeneCard	4.89823
440	COG4	Component Of Oligomeric Golgi Complex 4	GeneCard	4.89373
441	SETBP1	SET Binding Protein 1	GeneCard	4.88646
442	PRL	Prolactin	GeneCard	4.88517
443	IARS1	Isoleucyl-TRNA Synthetase 1	GeneCard	4.87957
444	IL5	Interleukin 5	GeneCard	4.87932
445	DLK1	Delta Like Non-Canonical Notch Ligand 1	GeneCard	4.85616
446	ACE	Angiotensin I Converting Enzyme	GeneCard	4.85483
447	GATA6	GATA Binding Protein 6	GeneCard	4.84063
448	MPZ	Myelin Protein Zero	GeneCard	4.84032
449	LIF	LIF Interleukin 6 Family Cytokine	GeneCard	4.83712
450	JAK2	Janus Kinase 2	GeneCard	4.82526
451	CNOT1	CCR4-NOT Transcription Complex Subunit 1	GeneCard	4.825
452	BUB3	BUB3 Mitotic Checkpoint Protein	GeneCard	4.81716
453	PAPPA	Pappalysin 1	GeneCard	4.80808
454	CDKN3	Cyclin Dependent Kinase Inhibitor 3	GeneCard	4.80732
455	PDE4D	Phosphodiesterase 4D	GeneCard	4.79731
456	NPM1	Nucleophosmin 1	GeneCard	4.79523
457	ESCO2	Establishment Of Sister Chromatid Cohesion N-Acetyltransferase 2	GeneCard	4.79166
458	PPP1CB	Protein Phosphatase 1 Catalytic Subunit Beta	GeneCard	4.78342
459	DCC	DCC Netrin 1 Receptor	GeneCard	4.78251
460	ANXA2	Annexin A2	GeneCard	4.77749
461	FANCI	FA Complementation Group I	GeneCard	4.75711
462	XRCC4	X-Ray Repair Cross Complementing 4	GeneCard	4.7564
463	UROD	Uroporphyrinogen Decarboxylase	GeneCard	4.74628
464	LAMA2	Laminin Subunit Alpha 2	GeneCard	4.74584
465	BMP4	Bone Morphogenetic Protein 4	GeneCard	4.73684
466	CHD7	Chromodomain Helicase DNA Binding Protein 7	GeneCard	4.73518
467	PRKDC	Protein Kinase, DNA-Activated, Catalytic Subunit	GeneCard	4.72828
468	MEGF10	Multiple EGF Like Domains 10	GeneCard	4.72665
469	ADAMTS13	ADAM Metallopeptidase With Thrombospondin Type 1 Motif 13	GeneCard	4.71986
470	SRPX2	Sushi Repeat Containing Protein X-Linked 2	GeneCard	4.71937
471	PIK3CD	Phosphatidylinositol-4,5-Bisphosphate 3-Kinase Catalytic Subunit Delta	GeneCard	4.70893
472	MDK	Midkine	GeneCard	4.69782
473	KITLG	KIT Ligand	GeneCard	4.69734
474	CCND1	Cyclin D1	GeneCard	4.69583
475	HNF4A	Hepatocyte Nuclear Factor 4 Alpha	GeneCard	4.69514
476	EMP2	Epithelial Membrane Protein 2	GeneCard	4.6884
477	LCK	LCK Proto-Oncogene, Src Family Tyrosine Kinase	GeneCard	4.68779
478	FBLN1	Fibulin 1	GeneCard	4.67788
479	GSK3B	Glycogen Synthase Kinase 3 Beta	GeneCard	4.67651
480	RELA	RELA Proto-Oncogene, NF-KB Subunit	GeneCard	4.66527
481	HOXA10	Homeobox A10	GeneCard	4.6605
482	S100A9	S100 Calcium Binding Protein A9	GeneCard	4.65166
483	TALDO1	Transaldolase 1	GeneCard	4.64997
484	NEAT1	Nuclear Paraspeckle Assembly Transcript 1	GeneCard	4.63562
485	ERCC5	ERCC Excision Repair 5, Endonuclease	GeneCard	4.6316
486	SEMA3E	Semaphorin 3E	GeneCard	4.631
487	DGCR2	DiGeorge Syndrome Critical Region Gene 2	GeneCard	4.62723
488	MLXIPL	MLX Interacting Protein Like	GeneCard	4.62466
489	TJP2	Tight Junction Protein 2	GeneCard	4.61668
490	CYTH1	Cytohesin 1	GeneCard	4.60579
491	PRPS1	Phosphoribosyl Pyrophosphate Synthetase 1	GeneCard	4.60535
492	AQP4	Aquaporin 4	GeneCard	4.59574
493	DLL1	Delta Like Canonical Notch Ligand 1	GeneCard	4.59334
494	COL7A1	Collagen Type VII Alpha 1 Chain	GeneCard	4.59274
495	KNG1	Kininogen 1	GeneCard	4.59159
496	UNC5D	Unc-5 Netrin Receptor D	GeneCard	4.5913
497	RB1	RB Transcriptional Corepressor 1	GeneCard	4.57513
498	CYP11A1	Cytochrome P450 Family 11 Subfamily A Member 1	GeneCard	4.57306
499	BUB1	BUB1 Mitotic Checkpoint Serine/Threonine Kinase	GeneCard	4.57293
500	MTOR	Mechanistic Target Of Rapamycin Kinase	GeneCard	4.56807
501	NLGN3	Neuroligin 3	GeneCard	4.56456
502	THPO	Thrombopoietin	GeneCard	4.56082
503	SEMA5A	Semaphorin 5A	GeneCard	4.54262
504	ADA	Adenosine Deaminase	GeneCard	4.54164
505	TFAP2A	Transcription Factor AP-2 Alpha	GeneCard	4.5406
506	CANT1	Calcium Activated Nucleotidase 1	GeneCard	4.52948
507	S100A8	S100 Calcium Binding Protein A8	GeneCard	4.52803
508	TXNRD2	Thioredoxin Reductase 2	GeneCard	4.52302
509	CREBBP	CREB Binding Protein	GeneCard	4.51548
510	SLC22A18	Solute Carrier Family 22 Member 18	GeneCard	4.50988
511	RTN4	Reticulon 4	GeneCard	4.50729
512	ELP4	Elongator Acetyltransferase Complex Subunit 4	GeneCard	4.5066
513	LTF	Lactotransferrin	GeneCard	4.50485
514	IL18	Interleukin 18	GeneCard	4.50348
515	ALPP	Alkaline Phosphatase, Placental	GeneCard	4.49979
516	CD40LG	CD40 Ligand	GeneCard	4.49832
517	CD40LG	CD40 Ligand	GeneCard	4.49832
518	TAPT1	Transmembrane Anterior Posterior Transformation 1	GeneCard	4.48006
519	NALCN	Sodium Leak Channel, Non-Selective	GeneCard	4.44047
520	COL17A1	Collagen Type XVII Alpha 1 Chain	GeneCard	4.43655
521	JAG1	Jagged Canonical Notch Ligand 1	GeneCard	4.42392
522	EFNB1	Ephrin B1	GeneCard	4.42248
523	CD14	CD14 Molecule	GeneCard	4.42116
524	BDNF	Brain Derived Neurotrophic Factor	GeneCard	4.41697
525	PLXND1	Plexin D1	GeneCard	4.40295
526	NDUFB11	NADH:Ubiquinone Oxidoreductase Subunit B11	GeneCard	4.40108
527	HSPB1	Heat Shock Protein Family B (Small) Member 1	GeneCard	4.40036
528	EGFL7	EGF Like Domain Multiple 7	GeneCard	4.39136
529	TNFRSF1A	TNF Receptor Superfamily Member 1A	GeneCard	4.38283
530	NDE1	NudE Neurodevelopment Protein 1	GeneCard	4.38074
531	FGA	Fibrinogen Alpha Chain	GeneCard	4.37689
532	RPS10	Ribosomal Protein S10	GeneCard	4.36637
533	CAT	Catalase	GeneCard	4.362
534	ETS1	ETS Proto-Oncogene 1, Transcription Factor	GeneCard	4.35781
535	IL13	Interleukin 13	GeneCard	4.34546
536	POU5F1	POU Class 5 Homeobox 1	GeneCard	4.3415
537	GHRL	Ghrelin And Obestatin Prepropeptide	GeneCard	4.3378
538	TBX1	T-Box Transcription Factor 1	GeneCard	4.33428
539	TGIF1	TGFB Induced Factor Homeobox 1	GeneCard	4.32758
540	POLE4	DNA Polymerase Epsilon 4, Accessory Subunit	GeneCard	4.31683
541	HRAS	HRas Proto-Oncogene, GTPase	GeneCard	4.31458
542	MC2R	Melanocortin 2 Receptor	GeneCard	4.31423
543	ERCC3	ERCC Excision Repair 3, TFIIH Core Complex Helicase Subunit	GeneCard	4.31013
544	AGER	Advanced Glycosylation End-Product Specific Receptor	GeneCard	4.28782
545	EPHB4	EPH Receptor B4	GeneCard	4.28658
546	NIN	Ninein	GeneCard	4.28623
547	HMOX1	Heme Oxygenase 1	GeneCard	4.28348
548	NEXN	Nexilin F-Actin Binding Protein	GeneCard	4.27967
549	CTBP1	C-Terminal Binding Protein 1	GeneCard	4.27226
550	BRCA1	BRCA1 DNA Repair Associated	GeneCard	4.26795
551	SPG7	SPG7 Matrix AAA Peptidase Subunit, Paraplegin	GeneCard	4.26461
552	SPG7	SPG7 Matrix AAA Peptidase Subunit, Paraplegin	GeneCard	4.26461
553	CCL4	C-C Motif Chemokine Ligand 4	GeneCard	4.25768
554	SPON1	Spondin 1	GeneCard	4.25061
555	ADAM8	ADAM Metallopeptidase Domain 8	GeneCard	4.24729
556	FBLN7	Fibulin 7	GeneCard	4.23463
557	DHCR7	7-Dehydrocholesterol Reductase	GeneCard	4.2265
558	EPO	Erythropoietin	GeneCard	4.22399
559	GLB1	Galactosidase Beta 1	GeneCard	4.2197
560	PSEN1	Presenilin 1	GeneCard	4.21865
561	SMARCA4	SWI/SNF Related, Matrix Associated, Actin Dependent Regulator Of Chromatin, Subfamily A, Member 4	GeneCard	4.21834
562	PPP2R5D	Protein Phosphatase 2 Regulatory Subunit B'Delta	GeneCard	4.21644
563	RAD51	RAD51 Recombinase	GeneCard	4.21573
564	F2RL1	F2R Like Trypsin Receptor 1	GeneCard	4.21539
565	MEG3	Maternally Expressed 3	GeneCard	4.20608
566	CD84	CD84 Molecule	GeneCard	4.20381
567	ATM	ATM Serine/Threonine Kinase	GeneCard	4.20038
568	IGFBP2	Insulin Like Growth Factor Binding Protein 2	GeneCard	4.19666
569	DST	Dystonin	GeneCard	4.18446
570	LAMC3	Laminin Subunit Gamma 3	GeneCard	4.18308
571	BRIP1	BRCA1 Interacting Helicase 1	GeneCard	4.18119
572	EPHA3	EPH Receptor A3	GeneCard	4.17979
573	NKX2-5	NK2 Homeobox 5	GeneCard	4.17941
574	RAP1B	RAP1B, Member Of RAS Oncogene Family	GeneCard	4.17111
575	IGF2R	Insulin Like Growth Factor 2 Receptor	GeneCard	4.16971
576	ZFPM2	Zinc Finger Protein, FOG Family Member 2	GeneCard	4.16748
577	FMR1	Fragile X Messenger Ribonucleoprotein 1	GeneCard	4.16391
578	PPARA	Peroxisome Proliferator Activated Receptor Alpha	GeneCard	4.16044
579	DCN	Decorin	GeneCard	4.15325
580	ARID1B	AT-Rich Interaction Domain 1B	GeneCard	4.14876
581	CBL	Cbl Proto-Oncogene	GeneCard	4.14548
582	COMP	Cartilage Oligomeric Matrix Protein	GeneCard	4.14185
583	SHH	Sonic Hedgehog Signaling Molecule	GeneCard	4.1403
584	SMAD4	SMAD Family Member 4	GeneCard	4.13345
585	PSPH	Phosphoserine Phosphatase	GeneCard	4.12905
586	CTSK	Cathepsin K	GeneCard	4.11888
587	CDKN1B	Cyclin Dependent Kinase Inhibitor 1B	GeneCard	4.11558
588	DDX11	DEAD/H-Box Helicase 11	GeneCard	4.10625
589	COL2A1	Collagen Type II Alpha 1 Chain	GeneCard	4.10098
590	BLK	BLK Proto-Oncogene, Src Family Tyrosine Kinase	GeneCard	4.09813
591	FLNC	Filamin C	GeneCard	4.09677
592	FAM20C	FAM20C Golgi Associated Secretory Pathway Kinase	GeneCard	4.095
593	COMT	Catechol-O-Methyltransferase	GeneCard	4.09239
594	ACTC1	Actin Alpha Cardiac Muscle 1	GeneCard	4.09149
595	FANCB	FA Complementation Group B	GeneCard	4.09106
596	COG1	Component Of Oligomeric Golgi Complex 1	GeneCard	4.09007
597	BMX	BMX Non-Receptor Tyrosine Kinase	GeneCard	4.08943
598	ATP7A	ATPase Copper Transporting Alpha	GeneCard	4.07945
599	LIMK1	LIM Domain Kinase 1	GeneCard	4.0774
600	IRS2	Insulin Receptor Substrate 2	GeneCard	4.07576
601	ARF6	ADP Ribosylation Factor 6	GeneCard	4.07117
602	SPTBN1	Spectrin Beta, Non-Erythrocytic 1	GeneCard	4.06508
603	GLDN	Gliomedin	GeneCard	4.06139
604	PKP4	Plakophilin 4	GeneCard	4.06115
605	RREB1	Ras Responsive Element Binding Protein 1	GeneCard	4.06108
606	NSD2	Nuclear Receptor Binding SET Domain Protein 2	GeneCard	4.05919
607	SMARCA2	SWI/SNF Related, Matrix Associated, Actin Dependent Regulator Of Chromatin, Subfamily A, Member 2	GeneCard	4.05851
608	NUS1	NUS1 Dehydrodolichyl Diphosphate Synthase Subunit	GeneCard	4.05652
609	ERCC1	ERCC Excision Repair 1, Endonuclease Non-Catalytic Subunit	GeneCard	4.05031
610	IL3	Interleukin 3	GeneCard	4.04203
611	CDH7	Cadherin 7	GeneCard	4.04013
612	CDH7	Cadherin 7	GeneCard	4.04013
613	CLEC12A	C-Type Lectin Domain Family 12 Member A	GeneCard	4.03411
614	SOX2	SRY-Box Transcription Factor 2	GeneCard	4.03214
615	CCR5	C-C Motif Chemokine Receptor 5	GeneCard	4.03079
616	XPC	XPC Complex Subunit, DNA Damage Recognition And Repair Factor	GeneCard	4.02964
617	ROBO1	Roundabout Guidance Receptor 1	GeneCard	4.0184
618	NDUFB10	NADH:Ubiquinone Oxidoreductase Subunit B10	GeneCard	4.01636
619	ABCD1	ATP Binding Cassette Subfamily D Member 1	GeneCard	4.0124
620	NF1	Neurofibromin 1	GeneCard	4.00749
621	MBP	Myelin Basic Protein	GeneCard	4.00658
622	PKLR	Pyruvate Kinase L/R	GeneCard	4.00158
623	RASA1	RAS P21 Protein Activator 1	GeneCard	3.99794
624	GJB2	Gap Junction Protein Beta 2	GeneCard	3.99735
625	AGT	Angiotensinogen	GeneCard	3.99462
626	CFL1	Cofilin 1	GeneCard	3.99302
627	NDUFS4	NADH:Ubiquinone Oxidoreductase Subunit S4	GeneCard	3.99025
628	PIK3R2	Phosphoinositide-3-Kinase Regulatory Subunit 2	GeneCard	3.9842
629	FUT8	Fucosyltransferase 8	GeneCard	3.98037
630	AFP	Alpha Fetoprotein	GeneCard	3.97908
631	CEL	Carboxyl Ester Lipase	GeneCard	3.97799
632	ST3GAL4	ST3 Beta-Galactoside Alpha-2,3-Sialyltransferase 4	GeneCard	3.968
633	TP63	Tumor Protein P63	GeneCard	3.96598
634	YY1	YY1 Transcription Factor	GeneCard	3.95749
635	POMC	Proopiomelanocortin	GeneCard	3.95534
636	GAS6	Growth Arrest Specific 6	GeneCard	3.9506
637	ELANE	Elastase, Neutrophil Expressed	GeneCard	3.9479
638	STAT1	Signal Transducer And Activator Of Transcription 1	GeneCard	3.9408
639	GLI2	GLI Family Zinc Finger 2	GeneCard	3.93346
640	NF2	NF2, Moesin-Ezrin-Radixin Like (MERLIN) Tumor Suppressor	GeneCard	3.92221
641	PPFIBP1	PPFIA Binding Protein 1	GeneCard	3.90932
642	SIGLEC8	Sialic Acid Binding Ig Like Lectin 8	GeneCard	3.89798
643	ZAP70	Zeta Chain Of T Cell Receptor Associated Protein Kinase 70	GeneCard	3.89641
644	TNFSF11	TNF Superfamily Member 11	GeneCard	3.88663
645	DNM2	Dynamin 2	GeneCard	3.88113
646	GLI3	GLI Family Zinc Finger 3	GeneCard	3.86878
647	CCL11	C-C Motif Chemokine Ligand 11	GeneCard	3.8677
648	MSX1	Msh Homeobox 1	GeneCard	3.85708
649	CXCR3	C-X-C Motif Chemokine Receptor 3	GeneCard	3.84206
650	NDUFV1	NADH:Ubiquinone Oxidoreductase Core Subunit V1	GeneCard	3.84057
651	ADM	Adrenomedullin	GeneCard	3.83683
652	CYFIP2	Cytoplasmic FMR1 Interacting Protein 2	GeneCard	3.83573
653	NODAL	Nodal Growth Differentiation Factor	GeneCard	3.83471
654	EMG1	EMG1 N1-Specific Pseudouridine Methyltransferase	GeneCard	3.82979
655	CXCL10	C-X-C Motif Chemokine Ligand 10	GeneCard	3.82912
656	MYC	MYC Proto-Oncogene, BHLH Transcription Factor	GeneCard	3.82644
657	RARB	Retinoic Acid Receptor Beta	GeneCard	3.81681
658	OSGEP	O-Sialoglycoprotein Endopeptidase	GeneCard	3.81446
659	SDHA	Succinate Dehydrogenase Complex Flavoprotein Subunit A	GeneCard	3.81212
660	TUBA1A	Tubulin Alpha 1a	GeneCard	3.81163
661	AJAP1	Adherens Junctions Associated Protein 1	GeneCard	3.81147
662	GAPDH	Glyceraldehyde-3-Phosphate Dehydrogenase	GeneCard	3.80547
663	NHP2	NHP2 Ribonucleoprotein	GeneCard	3.79914
664	RETN	Resistin	GeneCard	3.79866
665	KISS1	KiSS-1 Metastasis Suppressor	GeneCard	3.79431
666	CDK5	Cyclin Dependent Kinase 5	GeneCard	3.79355
667	GFAP	Glial Fibrillary Acidic Protein	GeneCard	3.78907
668	CSF3R	Colony Stimulating Factor 3 Receptor	GeneCard	3.78843
669	GATA1	GATA Binding Protein 1	GeneCard	3.7818
670	NOD2	Nucleotide Binding Oligomerization Domain Containing 2	GeneCard	3.77365
671	SERPINB2	Serpin Family B Member 2	GeneCard	3.77329
672	GH1	Growth Hormone 1	GeneCard	3.76744
673	SEC61A1	SEC61 Translocon Subunit Alpha 1	GeneCard	3.7657
674	NGF	Nerve Growth Factor	GeneCard	3.76236
675	PIGG	Phosphatidylinositol Glycan Anchor Biosynthesis Class G	GeneCard	3.76121
676	TLR2	Toll Like Receptor 2	GeneCard	3.75741
677	FTO	FTO Alpha-Ketoglutarate Dependent Dioxygenase	GeneCard	3.75671
678	SCARF2	Scavenger Receptor Class F Member 2	GeneCard	3.75423
679	CHUK	Component Of Inhibitor Of Nuclear Factor Kappa B Kinase Complex	GeneCard	3.75215
680	F2R	Coagulation Factor II Thrombin Receptor	GeneCard	3.74781
681	APOA1	Apolipoprotein A1	GeneCard	3.7434
682	ATAD3A	ATPase Family AAA Domain Containing 3A	GeneCard	3.73462
683	CCM2L	CCM2 Like Scaffold Protein	GeneCard	3.73154
684	CNTNAP2	Contactin Associated Protein 2	GeneCard	3.73031
685	LAGE3	L Antigen Family Member 3	GeneCard	3.70817
686	GNA13	G Protein Subunit Alpha 13	GeneCard	3.70784
687	GBA1	Glucosylceramidase Beta 1	GeneCard	3.70748
688	BAX	BCL2 Associated X, Apoptosis Regulator	GeneCard	3.70624
689	YWHAE	Tyrosine 3-Monooxygenase/Tryptophan 5-Monooxygenase Activation Protein Epsilon	GeneCard	3.7034
690	RAB3GAP1	RAB3 GTPase Activating Protein Catalytic Subunit 1	GeneCard	3.70302
691	AR	Androgen Receptor	GeneCard	3.70071
692	KIF2A	Kinesin Family Member 2A	GeneCard	3.69763
693	EMILIN1	Elastin Microfibril Interfacer 1	GeneCard	3.69597
694	RAB21	RAB21, Member RAS Oncogene Family	GeneCard	3.69264
695	HNF1A	HNF1 Homeobox A	GeneCard	3.69043
696	TIMP2	TIMP Metallopeptidase Inhibitor 2	GeneCard	3.67715
697	SLC25A13	Solute Carrier Family 25 Member 13	GeneCard	3.67614
698	PCDHB4	Protocadherin Beta 4	GeneCard	3.6745
699	MMP7	Matrix Metallopeptidase 7	GeneCard	3.67323
700	KRAS	KRAS Proto-Oncogene, GTPase	GeneCard	3.6721
701	PMM2	Phosphomannomutase 2	GeneCard	3.66989
702	PTPN1	Protein Tyrosine Phosphatase Non-Receptor Type 1	GeneCard	3.6662
703	NBEAL2	Neurobeachin Like 2	GeneCard	3.6646
704	LIFR	LIF Receptor Subunit Alpha	GeneCard	3.6642
705	SOX11	SRY-Box Transcription Factor 11	GeneCard	3.6504
706	FANCD2	FA Complementation Group D2	GeneCard	3.64919
707	NDUFS3	NADH:Ubiquinone Oxidoreductase Core Subunit S3	GeneCard	3.64698
708	ERF	ETS2 Repressor Factor	GeneCard	3.64619
709	PITX3	Paired Like Homeodomain 3	GeneCard	3.64139
710	CASK	Calcium/Calmodulin Dependent Serine Protein Kinase	GeneCard	3.63959
711	PCDHGA5	Protocadherin Gamma Subfamily A, 5	GeneCard	3.63604
712	PNPT1	Polyribonucleotide Nucleotidyltransferase 1	GeneCard	3.63237
713	TENT5A	Terminal Nucleotidyltransferase 5A	GeneCard	3.61905
714	CDKN2A	Cyclin Dependent Kinase Inhibitor 2A	GeneCard	3.61895
715	ASPH	Aspartate Beta-Hydroxylase	GeneCard	3.61437
716	MT-ND1	Mitochondrially Encoded NADH:Ubiquinone Oxidoreductase Core Subunit 1	GeneCard	3.61035
717	OXT	Oxytocin/Neurophysin I Prepropeptide	GeneCard	3.60824
718	SDHB	Succinate Dehydrogenase Complex Iron Sulfur Subunit B	GeneCard	3.59943
719	IFNB1	Interferon Beta 1	GeneCard	3.59162
720	GUCY2C	Guanylate Cyclase 2C	GeneCard	3.58998
721	PDHA1	Pyruvate Dehydrogenase E1 Subunit Alpha 1	GeneCard	3.58704
722	NDUFS7	NADH:Ubiquinone Oxidoreductase Core Subunit S7	GeneCard	3.58595
723	CDH20	Cadherin 20	GeneCard	3.58351
724	PPP2CA	Protein Phosphatase 2 Catalytic Subunit Alpha	GeneCard	3.57714
725	NCAPG2	Non-SMC Condensin II Complex Subunit G2	GeneCard	3.57393
726	CYP19A1	Cytochrome P450 Family 19 Subfamily A Member 1	GeneCard	3.5694
727	FUT4	Fucosyltransferase 4	GeneCard	3.56024
728	S1PR1	Sphingosine-1-Phosphate Receptor 1	GeneCard	3.55894
729	RPS20	Ribosomal Protein S20	GeneCard	3.55633
730	TTC7A	Tetratricopeptide Repeat Domain 7A	GeneCard	3.54413
731	CD8A	CD8a Molecule	GeneCard	3.53845
732	SMAD3	SMAD Family Member 3	GeneCard	3.52971
733	FANCG	FA Complementation Group G	GeneCard	3.52838
734	FRAS1	Fraser Extracellular Matrix Complex Subunit 1	GeneCard	3.52747
735	TOR1A	Torsin Family 1 Member A	GeneCard	3.52745
736	CDK10	Cyclin Dependent Kinase 10	GeneCard	3.52703
737	PCDHGC4	Protocadherin Gamma Subfamily C, 4	GeneCard	3.52624
738	PTCH1	Patched 1	GeneCard	3.52411
739	AMBP	Alpha-1-Microglobulin/Bikunin Precursor	GeneCard	3.52192
740	IGFALS	Insulin Like Growth Factor Binding Protein Acid Labile Subunit	GeneCard	3.52042
741	NLGN4X	Neuroligin 4 X-Linked	GeneCard	3.52016
742	LGALS3BP	Galectin 3 Binding Protein	GeneCard	3.51921
743	NDUFV2	NADH:Ubiquinone Oxidoreductase Core Subunit V2	GeneCard	3.5176
744	EFEMP2	EGF Containing Fibulin Extracellular Matrix Protein 2	GeneCard	3.51291
745	SIRPG	Signal Regulatory Protein Gamma	GeneCard	3.51152
746	NBN	Nibrin	GeneCard	3.50862
747	TUFM	Tu Translation Elongation Factor, Mitochondrial	GeneCard	3.50826
748	SMARCAL1	SWI/SNF Related, Matrix Associated, Actin Dependent Regulator Of Chromatin, Subfamily A Like 1	GeneCard	3.50749
749	NDUFS2	NADH:Ubiquinone Oxidoreductase Core Subunit S2	GeneCard	3.5073
750	NPPB	Natriuretic Peptide B	GeneCard	3.50704
751	CCDC85C	Coiled-Coil Domain Containing 85C	GeneCard	3.50097
752	FLVCR2	FLVCR Heme Transporter 2	GeneCard	3.48114
753	KLF11	KLF Transcription Factor 11	GeneCard	3.48054
754	RAB10	RAB10, Member RAS Oncogene Family	GeneCard	3.48029
755	PCDHGA3	Protocadherin Gamma Subfamily A, 3	GeneCard	3.47754
756	FSTL3	Follistatin Like 3	GeneCard	3.47635
757	SMARCE1	SWI/SNF Related, Matrix Associated, Actin Dependent Regulator Of Chromatin, Subfamily E, Member 1	GeneCard	3.47606
758	SLC3A2	Solute Carrier Family 3 Member 2	GeneCard	3.47559
759	MPZL1	Myelin Protein Zero Like 1	GeneCard	3.47253
760	IL11	Interleukin 11	GeneCard	3.47117
761	NDUFS1	NADH:Ubiquinone Oxidoreductase Core Subunit S1	GeneCard	3.46293
762	VANGL2	VANGL Planar Cell Polarity Protein 2	GeneCard	3.45973
763	GMDS	GDP-Mannose 4,6-Dehydratase	GeneCard	3.45592
764	PCDHA9	Protocadherin Alpha 9	GeneCard	3.45489
765	HSP90B1	Heat Shock Protein 90 Beta Family Member 1	GeneCard	3.45439
766	EFEMP1	EGF Containing Fibulin Extracellular Matrix Protein 1	GeneCard	3.45437
767	CASP8	Caspase 8	GeneCard	3.44836
768	XIAP	X-Linked Inhibitor Of Apoptosis	GeneCard	3.4483
769	LYVE1	Lymphatic Vessel Endothelial Hyaluronan Receptor 1	GeneCard	3.44365
770	KRT3	Keratin 3	GeneCard	3.44209
771	MUC16	Mucin 16, Cell Surface Associated	GeneCard	3.43839
772	LTA	Lymphotoxin Alpha	GeneCard	3.43834
773	FCGR3A	Fc Gamma Receptor IIIa	GeneCard	3.43738
774	EIF2AK3	Eukaryotic Translation Initiation Factor 2 Alpha Kinase 3	GeneCard	3.43561
775	AKT3	AKT Serine/Threonine Kinase 3	GeneCard	3.43534
776	DHCR24	24-Dehydrocholesterol Reductase	GeneCard	3.43347
777	VEGFC	Vascular Endothelial Growth Factor C	GeneCard	3.43072
778	PRKAR1A	Protein Kinase CAMP-Dependent Type I Regulatory Subunit Alpha	GeneCard	3.42423
779	ANGPTL4	Angiopoietin Like 4	GeneCard	3.42416
780	STRA6	Signaling Receptor And Transporter Of Retinol STRA6	GeneCard	3.41888
781	FGFRL1	Fibroblast Growth Factor Receptor Like 1	GeneCard	3.41386
782	PDE4A	Phosphodiesterase 4A	GeneCard	3.40718
783	NDUFB9	NADH:Ubiquinone Oxidoreductase Subunit B9	GeneCard	3.40479
784	RPS24	Ribosomal Protein S24	GeneCard	3.40292
785	DNAJC21	DnaJ Heat Shock Protein Family (Hsp40) Member C21	GeneCard	3.40284
786	AGTR1	Angiotensin II Receptor Type 1	GeneCard	3.39917
787	BRPF1	Bromodomain And PHD Finger Containing 1	GeneCard	3.39504
788	LPL	Lipoprotein Lipase	GeneCard	3.39267
789	NEUROD1	Neuronal Differentiation 1	GeneCard	3.39196
790	PHLDB2	Pleckstrin Homology Like Domain Family B Member 2	GeneCard	3.38666
791	SEMA3A	Semaphorin 3A	GeneCard	3.38202
792	TUBA1B	Tubulin Alpha 1b	GeneCard	3.37434
793	PPP2R1A	Protein Phosphatase 2 Scaffold Subunit Aalpha	GeneCard	3.37185
794	STAT2	Signal Transducer And Activator Of Transcription 2	GeneCard	3.37034
795	CSPG4	Chondroitin Sulfate Proteoglycan 4	GeneCard	3.3698
796	TUBB2B	Tubulin Beta 2B Class IIb	GeneCard	3.36699
797	CLDN11	Claudin 11	GeneCard	3.36639
798	IL6ST	Interleukin 6 Cytokine Family Signal Transducer	GeneCard	3.36354
799	HSPD1	Heat Shock Protein Family D (Hsp60) Member 1	GeneCard	3.36255
800	RERE	Arginine-Glutamic Acid Dipeptide Repeats	GeneCard	3.36208
801	C1QBP	Complement C1q Binding Protein	GeneCard	3.36074
802	IFITM5	Interferon Induced Transmembrane Protein 5	GeneCard	3.34955
803	XDH	Xanthine Dehydrogenase	GeneCard	3.33719
804	BYSL	Bystin Like	GeneCard	3.33452
805	APPL1	Adaptor Protein, Phosphotyrosine Interacting With PH Domain And Leucine Zipper 1	GeneCard	3.33422
806	HNRNPK	Heterogeneous Nuclear Ribonucleoprotein K	GeneCard	3.33364
807	DIAPH1	Diaphanous Related Formin 1	GeneCard	3.33265
808	IFNA1	Interferon Alpha 1	GeneCard	3.32712
809	ZIC2	Zic Family Member 2	GeneCard	3.32627
810	SNAI2	Snail Family Transcriptional Repressor 2	GeneCard	3.32529
811	IRF6	Interferon Regulatory Factor 6	GeneCard	3.32381
812	RS1	Retinoschisin 1	GeneCard	3.31703
813	FREM2	FRAS1 Related Extracellular Matrix 2	GeneCard	3.31662
814	ARHGEF11	Rho Guanine Nucleotide Exchange Factor 11	GeneCard	3.31514
815	ADAMTS17	ADAM Metallopeptidase With Thrombospondin Type 1 Motif 17	GeneCard	3.31357
816	COG7	Component Of Oligomeric Golgi Complex 7	GeneCard	3.31172
817	HSPA8	Heat Shock Protein Family A (Hsp70) Member 8	GeneCard	3.3062
818	IL7	Interleukin 7	GeneCard	3.30319
819	TELO2	Telomere Maintenance 2	GeneCard	3.30194
820	GHR	Growth Hormone Receptor	GeneCard	3.30165
821	NPPA	Natriuretic Peptide A	GeneCard	3.3004
822	HMGB1	High Mobility Group Box 1	GeneCard	3.29745
823	PCDH19	Protocadherin 19	GeneCard	3.29734
824	USP9X	Ubiquitin Specific Peptidase 9 X-Linked	GeneCard	3.29406
825	NFKBIA	NFKB Inhibitor Alpha	GeneCard	3.29049
826	SOS1	SOS Ras/Rac Guanine Nucleotide Exchange Factor 1	GeneCard	3.2888
827	SURF1	SURF1 Cytochrome C Oxidase Assembly Factor	GeneCard	3.28863
828	SLC17A5	Solute Carrier Family 17 Member 5	GeneCard	3.28799
829	GTF2E2	General Transcription Factor IIE Subunit 2	GeneCard	3.28705
830	CCL3	C-C Motif Chemokine Ligand 3	GeneCard	3.2861
831	FLI1	Fli-1 Proto-Oncogene, ETS Transcription Factor	GeneCard	3.28588
832	LONP1	Lon Peptidase 1, Mitochondrial	GeneCard	3.272
833	BLM	BLM RecQ Like Helicase	GeneCard	3.27145
834	SRF	Serum Response Factor	GeneCard	3.267
835	TNNI2	Troponin I2, Fast Skeletal Type	GeneCard	3.26558
836	COG5	Component Of Oligomeric Golgi Complex 5	GeneCard	3.25514
837	STOX1	Storkhead Box 1	GeneCard	3.2442
838	NOP10	NOP10 Ribonucleoprotein	GeneCard	3.24248
839	LARS2	Leucyl-TRNA Synthetase 2, Mitochondrial	GeneCard	3.2398
840	PKHD1	PKHD1 Ciliary IPT Domain Containing Fibrocystin/Polyductin	GeneCard	3.23906
841	PKHD1	PKHD1 Ciliary IPT Domain Containing Fibrocystin/Polyductin	GeneCard	3.23906
842	RNF113A	Ring Finger Protein 113A	GeneCard	3.23209
843	CLDN4	Claudin 4	GeneCard	3.23134
844	POR	Cytochrome P450 Oxidoreductase	GeneCard	3.22698
845	PPARD	Peroxisome Proliferator Activated Receptor Delta	GeneCard	3.22662
846	TIMMDC1	Translocase Of Inner Mitochondrial Membrane Domain Containing 1	GeneCard	3.22488
847	ESR2	Estrogen Receptor 2	GeneCard	3.22376
848	MRPL44	Mitochondrial Ribosomal Protein L44	GeneCard	3.22151
849	WT1	WT1 Transcription Factor	GeneCard	3.22124
850	RPL10	Ribosomal Protein L10	GeneCard	3.21959
851	CDH19	Cadherin 19	GeneCard	3.21734
852	CDH19	Cadherin 19	GeneCard	3.21734
853	WNT7A	Wnt Family Member 7A	GeneCard	3.21605
854	F13A1	Coagulation Factor XIII A Chain	GeneCard	3.21187
855	ALG1	ALG1 Chitobiosyldiphosphodolichol Beta-Mannosyltransferase	GeneCard	3.20993
856	KRT7	Keratin 7	GeneCard	3.20537
857	ARID1A	AT-Rich Interaction Domain 1A	GeneCard	3.20289
858	MAP2K2	Mitogen-Activated Protein Kinase Kinase 2	GeneCard	3.1995
859	COL4A2	Collagen Type IV Alpha 2 Chain	GeneCard	3.19841
860	DNMT1	DNA Methyltransferase 1	GeneCard	3.1978
861	ARCN1	Archain 1	GeneCard	3.19609
862	SF3B4	Splicing Factor 3b Subunit 4	GeneCard	3.19532
863	CFH	Complement Factor H	GeneCard	3.19354
864	TGFB3	Transforming Growth Factor Beta 3	GeneCard	3.18353
865	FOS	Fos Proto-Oncogene, AP-1 Transcription Factor Subunit	GeneCard	3.18019
866	PCNA	Proliferating Cell Nuclear Antigen	GeneCard	3.1799
867	BAIAP2L1	BAR/IMD Domain Containing Adaptor Protein 2 Like 1	GeneCard	3.17976
868	PTPA	Protein Phosphatase 2 Phosphatase Activator	GeneCard	3.17431
869	RHCE	Rh Blood Group CcEe Antigens	GeneCard	3.17295
870	FASLG	Fas Ligand	GeneCard	3.15847
871	ADAM2	ADAM Metallopeptidase Domain 2	GeneCard	3.15828
872	ZNF699	Zinc Finger Protein 699	GeneCard	3.15548
873	AARS1	Alanyl-TRNA Synthetase 1	GeneCard	3.15457
874	SEC24C	SEC24 Homolog C, COPII Coat Complex Component	GeneCard	3.15294
875	SCARB1	Scavenger Receptor Class B Member 1	GeneCard	3.15273
876	KDELR2	KDEL Endoplasmic Reticulum Protein Retention Receptor 2	GeneCard	3.15261
877	CDK1	Cyclin Dependent Kinase 1	GeneCard	3.14753
878	TBX4	T-Box Transcription Factor 4	GeneCard	3.14521
879	COL5A1	Collagen Type V Alpha 1 Chain	GeneCard	3.14132
880	SMARCB1	SWI/SNF Related, Matrix Associated, Actin Dependent Regulator Of Chromatin, Subfamily B, Member 1	GeneCard	3.14123
881	IL1R1	Interleukin 1 Receptor Type 1	GeneCard	3.13029
882	FGF1	Fibroblast Growth Factor 1	GeneCard	3.12623
883	RPL21	Ribosomal Protein L21	GeneCard	3.12551
884	MPL	MPL Proto-Oncogene, Thrombopoietin Receptor	GeneCard	3.12428
885	MMP8	Matrix Metallopeptidase 8	GeneCard	3.12376
886	NR1H2	Nuclear Receptor Subfamily 1 Group H Member 2	GeneCard	3.1124
887	EVC2	EvC Ciliary Complex Subunit 2	GeneCard	3.11176
888	ERBB3	Erb-B2 Receptor Tyrosine Kinase 3	GeneCard	3.10886
889	DMD	Dystrophin	GeneCard	3.1045
890	NSDHL	NAD(P) Dependent Steroid Dehydrogenase-Like	GeneCard	3.09197
891	ASTN1	Astrotactin 1	GeneCard	3.08449
892	SOX4	SRY-Box Transcription Factor 4	GeneCard	3.07822
893	NDUFA1	NADH:Ubiquinone Oxidoreductase Subunit A1	GeneCard	3.07494
894	SERPINB5	Serpin Family B Member 5	GeneCard	3.06997
895	SERPINB5	Serpin Family B Member 5	GeneCard	3.06997
896	PAEP	Progestagen Associated Endometrial Protein	GeneCard	3.06967
897	CRELD1	Cysteine Rich With EGF Like Domains 1	GeneCard	3.06837
898	XYLT1	Xylosyltransferase 1	GeneCard	3.06075
899	RNASE3	Ribonuclease A Family Member 3	GeneCard	3.05732
900	SLC35A2	Solute Carrier Family 35 Member A2	GeneCard	3.05698
901	CDC25C	Cell Division Cycle 25C	GeneCard	3.05578
902	PDLIM1	PDZ And LIM Domain 1	GeneCard	3.05094
903	COL5A2	Collagen Type V Alpha 2 Chain	GeneCard	3.05037
904	KRT18	Keratin 18	GeneCard	3.04866
905	IL15	Interleukin 15	GeneCard	3.04853
906	MADD	MAP Kinase Activating Death Domain	GeneCard	3.04694
907	PLA2G4A	Phospholipase A2 Group IVA	GeneCard	3.04647
908	ARHGAP10	Rho GTPase Activating Protein 10	GeneCard	3.04508
909	MBL2	Mannose Binding Lectin 2	GeneCard	3.04329
910	IL1RAPL2	Interleukin 1 Receptor Accessory Protein Like 2	GeneCard	3.04133
911	SIX3	SIX Homeobox 3	GeneCard	3.03839
912	PDGFA	Platelet Derived Growth Factor Subunit A	GeneCard	3.03674
913	RHD	Rh Blood Group D Antigen	GeneCard	3.03627
914	B2M	Beta-2-Microglobulin	GeneCard	3.02543
915	GLI1	GLI Family Zinc Finger 1	GeneCard	3.02063
916	ACTN3	Actinin Alpha 3	GeneCard	3.01636
917	IFIH1	Interferon Induced With Helicase C Domain 1	GeneCard	3.01201
918	CSNK2A1	Casein Kinase 2 Alpha 1	GeneCard	3.00905
919	PKN2	Protein Kinase N2	GeneCard	3.00672
920	DKK1	Dickkopf WNT Signaling Pathway Inhibitor 1	GeneCard	3.00605
921	TKT	Transketolase	GeneCard	3.00414
922	BMPER	BMP Binding Endothelial Regulator	GeneCard	3.00298
923	FOXP2	Forkhead Box P2	GeneCard	2.99762
924	HLA-DRB1	Major Histocompatibility Complex, Class II, DR Beta 1	GeneCard	2.99569
925	IL2RG	Interleukin 2 Receptor Subunit Gamma	GeneCard	2.99345
926	PARP1	Poly(ADP-Ribose) Polymerase 1	GeneCard	2.98869
927	SOX9	SRY-Box Transcription Factor 9	GeneCard	2.98485
928	LETM1	Leucine Zipper And EF-Hand Containing Transmembrane Protein 1	GeneCard	2.98289
929	SUFU	SUFU Negative Regulator Of Hedgehog Signaling	GeneCard	2.9826
930	NPHP1	Nephrocystin 1	GeneCard	2.97583
931	NAMPT	Nicotinamide Phosphoribosyltransferase	GeneCard	2.97543
932	CXCL5	C-X-C Motif Chemokine Ligand 5	GeneCard	2.97419
933	NDN	Necdin, MAGE Family Member	GeneCard	2.97039
934	NCKAP1	NCK Associated Protein 1	GeneCard	2.96976
935	PEX5	Peroxisomal Biogenesis Factor 5	GeneCard	2.967
936	USH1C	USH1 Protein Network Component Harmonin	GeneCard	2.967
937	PALB2	Partner And Localizer Of BRCA2	GeneCard	2.96178
938	NRG1	Neuregulin 1	GeneCard	2.96039
939	ARF1	ADP Ribosylation Factor 1	GeneCard	2.95866
940	HLA-G	Major Histocompatibility Complex, Class I, G	GeneCard	2.95821
941	IL2RB	Interleukin 2 Receptor Subunit Beta	GeneCard	2.95505
942	DYNC2LI1	Dynein Cytoplasmic 2 Light Intermediate Chain 1	GeneCard	2.9546
943	SMARCC2	SWI/SNF Related, Matrix Associated, Actin Dependent Regulator Of Chromatin Subfamily C Member 2	GeneCard	2.95148
944	IGSF9B	Immunoglobulin Superfamily Member 9B	GeneCard	2.95078
945	PTHLH	Parathyroid Hormone Like Hormone	GeneCard	2.94996
946	WNT4	Wnt Family Member 4	GeneCard	2.94957
947	AXL	AXL Receptor Tyrosine Kinase	GeneCard	2.94885
948	GSTM1	Glutathione S-Transferase Mu 1	GeneCard	2.9456
949	S100B	S100 Calcium Binding Protein B	GeneCard	2.9413
950	CD46	CD46 Molecule	GeneCard	2.93953
951	TP53RK	TP53 Regulating Kinase	GeneCard	2.93932
952	FLII	FLII Actin Remodeling Protein	GeneCard	2.93744
953	RPS14	Ribosomal Protein S14	GeneCard	2.93655
954	PRUNE1	Prune Exopolyphosphatase 1	GeneCard	2.93348
955	PAX4	Paired Box 4	GeneCard	2.9229
956	GJA8	Gap Junction Protein Alpha 8	GeneCard	2.91449
957	SH2D3C	SH2 Domain Containing 3C	GeneCard	2.91415
958	TLR3	Toll Like Receptor 3	GeneCard	2.9113
959	CGB3	Chorionic Gonadotropin Subunit Beta 3	GeneCard	2.9044
960	NEK9	NIMA Related Kinase 9	GeneCard	2.90334
961	RECQL4	RecQ Like Helicase 4	GeneCard	2.89832
962	CDKN1A	Cyclin Dependent Kinase Inhibitor 1A	GeneCard	2.89771
963	NUP188	Nucleoporin 188	GeneCard	2.89728
964	APOH	Apolipoprotein H	GeneCard	2.89592
965	ANPEP	Alanyl Aminopeptidase, Membrane	GeneCard	2.89544
966	SERPINA1	Serpin Family A Member 1	GeneCard	2.89488
967	CASP9	Caspase 9	GeneCard	2.89403
968	CXCL13	C-X-C Motif Chemokine Ligand 13	GeneCard	2.89286
969	PIK3C2A	Phosphatidylinositol-4-Phosphate 3-Kinase Catalytic Subunit Type 2 Alpha	GeneCard	2.8892
970	CFTR	CF Transmembrane Conductance Regulator	GeneCard	2.8784
971	PDGFRA	Platelet Derived Growth Factor Receptor Alpha	GeneCard	2.87579
972	IGHE	Immunoglobulin Heavy Constant Epsilon	GeneCard	2.87483
973	BLZF1	Basic Leucine Zipper Nuclear Factor 1	GeneCard	2.87119
974	MACF1	Microtubule Actin Crosslinking Factor 1	GeneCard	2.8655
975	ARHGAP31	Rho GTPase Activating Protein 31	GeneCard	2.86057
976	WRAP53	WD Repeat Containing Antisense To TP53	GeneCard	2.85928
977	TARS1	Threonyl-TRNA Synthetase 1	GeneCard	2.85896
978	ADCY10	Adenylate Cyclase 10	GeneCard	2.85814
979	SON	SON DNA And RNA Binding Protein	GeneCard	2.85694
980	ADD1	Adducin 1	GeneCard	2.85676
981	EXOSC9	Exosome Component 9	GeneCard	2.85595
982	PPP1CC	Protein Phosphatase 1 Catalytic Subunit Gamma	GeneCard	2.85588
983	HSPA5	Heat Shock Protein Family A (Hsp70) Member 5	GeneCard	2.85435
984	AUTS2	Activator Of Transcription And Developmental Regulator AUTS2	GeneCard	2.85045
985	NDUFB7	NADH:Ubiquinone Oxidoreductase Subunit B7	GeneCard	2.85004
986	ZNF469	Zinc Finger Protein 469	GeneCard	2.84799
987	MMP12	Matrix Metallopeptidase 12	GeneCard	2.84614
988	NEFL	Neurofilament Light Chain	GeneCard	2.84055
989	TNFRSF11B	TNF Receptor Superfamily Member 11b	GeneCard	2.83966
990	ACHE	Acetylcholinesterase (Cartwright Blood Group)	GeneCard	2.83966
991	SNCA	Synuclein Alpha	GeneCard	2.83773
992	PTX3	Pentraxin 3	GeneCard	2.83473
993	RPS6KB1	Ribosomal Protein S6 Kinase B1	GeneCard	2.83259
994	ARHGAP29	Rho GTPase Activating Protein 29	GeneCard	2.8255
995	LEPQTL1	Leptin, Serum Levels Of	GeneCard	2.81689
996	HMGCR	3-Hydroxy-3-Methylglutaryl-CoA Reductase	GeneCard	2.81374
997	NOS1	Nitric Oxide Synthase 1	GeneCard	2.81235
998	OXA1L	OXA1L Mitochondrial Inner Membrane Protein	GeneCard	2.81177
999	SMN1	Survival Of Motor Neuron 1, Telomeric	GeneCard	2.81166
1000	MAGEL2	MAGE Family Member L2	GeneCard	2.81014
1001	SNRPB	Small Nuclear Ribonucleoprotein Polypeptides B And B1	GeneCard	2.80952
1002	CSNK2B	Casein Kinase 2 Beta	GeneCard	2.80746
1003	EPB41L1	Erythrocyte Membrane Protein Band 4.1 Like 1	GeneCard	2.80515
1004	DTNA	Dystrobrevin Alpha	GeneCard	2.80505
1005	USH2A	Usherin	GeneCard	2.79991
1006	RAB18	RAB18, Member RAS Oncogene Family	GeneCard	2.79685
1007	MKI67	Marker Of Proliferation Ki-67	GeneCard	2.79655
1008	FKTN	Fukutin	GeneCard	2.79092
1009	SLC25A24	Solute Carrier Family 25 Member 24	GeneCard	2.78883
1010	OBSCN	Obscurin, Cytoskeletal Calmodulin And Titin-Interacting RhoGEF	GeneCard	2.78074
1011	TOP1	DNA Topoisomerase I	GeneCard	2.77987
1012	CD1D	CD1d Molecule	GeneCard	2.7787
1013	IDH1	Isocitrate Dehydrogenase (NADP(+)) 1	GeneCard	2.77695
1014	BIRC3	Baculoviral IAP Repeat Containing 3	GeneCard	2.7766
1015	CYP1A1	Cytochrome P450 Family 1 Subfamily A Member 1	GeneCard	2.76975
1016	ARHGEF28	Rho Guanine Nucleotide Exchange Factor 28	GeneCard	2.76971
1017	NCF1	Neutrophil Cytosolic Factor 1	GeneCard	2.76575
1018	TBXA2R	Thromboxane A2 Receptor	GeneCard	2.76436
1019	NFE2L2	NFE2 Like BZIP Transcription Factor 2	GeneCard	2.7627
1020	B4GALT1	Beta-1,4-Galactosyltransferase 1	GeneCard	2.75903
1021	MLKL	Mixed Lineage Kinase Domain Like Pseudokinase	GeneCard	2.75869
1022	RUNX2	RUNX Family Transcription Factor 2	GeneCard	2.75805
1023	GATA2	GATA Binding Protein 2	GeneCard	2.75739
1024	CGB5	Chorionic Gonadotropin Subunit Beta 5	GeneCard	2.75576
1025	WARS2	Tryptophanyl TRNA Synthetase 2, Mitochondrial	GeneCard	2.75149
1026	RFWD3	Ring Finger And WD Repeat Domain 3	GeneCard	2.75149
1027	PCGF2	Polycomb Group Ring Finger 2	GeneCard	2.75149
1028	APOB	Apolipoprotein B	GeneCard	2.74928
1029	MIR126	MicroRNA 126	GeneCard	2.74396
1030	PTPN23	Protein Tyrosine Phosphatase Non-Receptor Type 23	GeneCard	2.74086
1031	ACTA2	Actin Alpha 2, Smooth Muscle	GeneCard	2.73925
1032	GSTP1	Glutathione S-Transferase Pi 1	GeneCard	2.73868
1033	VEGFD	Vascular Endothelial Growth Factor D	GeneCard	2.7367
1034	FCER2	Fc Epsilon Receptor II	GeneCard	2.73624
1035	NCAPD2	Non-SMC Condensin I Complex Subunit D2	GeneCard	2.72918
1036	SLC26A3	Solute Carrier Family 26 Member 3	GeneCard	2.7282
1037	LTBP2	Latent Transforming Growth Factor Beta Binding Protein 2	GeneCard	2.72685
1038	ABCB7	ATP Binding Cassette Subfamily B Member 7	GeneCard	2.72664
1039	LAMP2	Lysosomal Associated Membrane Protein 2	GeneCard	2.72512
1040	IRF8	Interferon Regulatory Factor 8	GeneCard	2.72373
1041	SST	Somatostatin	GeneCard	2.72334
1042	RPL38	Ribosomal Protein L38	GeneCard	2.71652
1043	SKAP2	Src Kinase Associated Phosphoprotein 2	GeneCard	2.71167
1044	UBA1	Ubiquitin Like Modifier Activating Enzyme 1	GeneCard	2.70803
1045	SPINT2	Serine Peptidase Inhibitor, Kunitz Type 2	GeneCard	2.70483
1046	DDB2	Damage Specific DNA Binding Protein 2	GeneCard	2.70352
1047	RASIP1	Ras Interacting Protein 1	GeneCard	2.69713
1048	TGFA	Transforming Growth Factor Alpha	GeneCard	2.69609
1049	IL6R	Interleukin 6 Receptor	GeneCard	2.69127
1050	OTUD6B	OTU Deubiquitinase 6B	GeneCard	2.68314
1051	CCNQ	Cyclin Q	GeneCard	2.68314
1052	NDUFA10	NADH:Ubiquinone Oxidoreductase Subunit A10	GeneCard	2.68238
1053	GPT	Glutamic--Pyruvic Transaminase	GeneCard	2.6803
1054	U2AF1	U2 Small Nuclear RNA Auxiliary Factor 1	GeneCard	2.67835
1055	RAB3GAP2	RAB3 GTPase Activating Non-Catalytic Protein Subunit 2	GeneCard	2.67182
1056	MIR146A	MicroRNA 146a	GeneCard	2.67172
1057	CNTN3	Contactin 3	GeneCard	2.67169
1058	ATP6V1A	ATPase H+ Transporting V1 Subunit A	GeneCard	2.66922
1059	ATP6V1E1	ATPase H+ Transporting V1 Subunit E1	GeneCard	2.66901
1060	NTN1	Netrin 1	GeneCard	2.66836
1061	DDX3X	DEAD-Box Helicase 3 X-Linked	GeneCard	2.66223
1062	LOX	Lysyl Oxidase	GeneCard	2.66091
1063	ANKS4B	Ankyrin Repeat And Sterile Alpha Motif Domain Containing 4B	GeneCard	2.65837
1064	AZGP1	Alpha-2-Glycoprotein 1, Zinc-Binding	GeneCard	2.6583
1065	FDFT1	Farnesyl-Diphosphate Farnesyltransferase 1	GeneCard	2.65824
1066	KANSL1	KAT8 Regulatory NSL Complex Subunit 1	GeneCard	2.65603
1067	TXN	Thioredoxin	GeneCard	2.64897
1068	FOXH1	Forkhead Box H1	GeneCard	2.64707
1069	XRCC2	X-Ray Repair Cross Complementing 2	GeneCard	2.64707
1070	LDLR	Low Density Lipoprotein Receptor	GeneCard	2.64698
1071	PLA2G2A	Phospholipase A2 Group IIA	GeneCard	2.64543
1072	CD86	CD86 Molecule	GeneCard	2.6403
1073	ZMYM2	Zinc Finger MYM-Type Containing 2	GeneCard	2.63851
1074	SLC35E3	Solute Carrier Family 35 Member E3	GeneCard	2.63777
1075	ARID2	AT-Rich Interaction Domain 2	GeneCard	2.63455
1076	AMH	Anti-Mullerian Hormone	GeneCard	2.63374
1077	CLU	Clusterin	GeneCard	2.63307
1078	CD55	CD55 Molecule (Cromer Blood Group)	GeneCard	2.63144
1079	PAFAH1B1	Platelet Activating Factor Acetylhydrolase 1b Regulatory Subunit 1	GeneCard	2.63054
1080	CITED2	Cbp/P300 Interacting Transactivator With Glu/Asp Rich Carboxy-Terminal Domain 2	GeneCard	2.62587
1081	NEXMIF	Neurite Extension And Migration Factor	GeneCard	2.62149
1082	PLS3	Plastin 3	GeneCard	2.62069
1083	HBEGF	Heparin Binding EGF Like Growth Factor	GeneCard	2.61896
1084	FGF7	Fibroblast Growth Factor 7	GeneCard	2.61704
1085	LGR5	Leucine Rich Repeat Containing G Protein-Coupled Receptor 5	GeneCard	2.61554
1086	MDM2	MDM2 Proto-Oncogene	GeneCard	2.61507
1087	BARX2	BARX Homeobox 2	GeneCard	2.61464
1088	PRKAR2A	Protein Kinase CAMP-Dependent Type II Regulatory Subunit Alpha	GeneCard	2.61457
1089	CD2AP	CD2 Associated Protein	GeneCard	2.61224
1090	ANK3	Ankyrin 3	GeneCard	2.6091
1091	ALX4	ALX Homeobox 4	GeneCard	2.60819
1092	LTBP1	Latent Transforming Growth Factor Beta Binding Protein 1	GeneCard	2.60677
1093	MIR1268B	MicroRNA 1268b	GeneCard	2.60478
1094	CRYAA	Crystallin Alpha A	GeneCard	2.60263
1095	MYPN	Myopalladin	GeneCard	2.60099
1096	RHAG	Rh Associated Glycoprotein	GeneCard	2.59934
1097	HADH	Hydroxyacyl-CoA Dehydrogenase	GeneCard	2.59821
1098	MTRR	5-Methyltetrahydrofolate-Homocysteine Methyltransferase Reductase	GeneCard	2.59773
1099	BAD	BCL2 Associated Agonist Of Cell Death	GeneCard	2.59512
1100	GTF2I	General Transcription Factor IIi	GeneCard	2.59265
1101	CRB2	Crumbs Cell Polarity Complex Component 2	GeneCard	2.59174
1102	ACTG2	Actin Gamma 2, Smooth Muscle	GeneCard	2.59007
1103	KATNB1	Katanin Regulatory Subunit B1	GeneCard	2.58935
1104	CHGA	Chromogranin A	GeneCard	2.58801
1105	PDHB	Pyruvate Dehydrogenase E1 Subunit Beta	GeneCard	2.58767
1106	YIF1B	Yip1 Interacting Factor Homolog B, Membrane Trafficking Protein	GeneCard	2.58652
1107	TF	Transferrin	GeneCard	2.58442
1108	IGFBP4	Insulin Like Growth Factor Binding Protein 4	GeneCard	2.58183
1109	YWHAG	Tyrosine 3-Monooxygenase/Tryptophan 5-Monooxygenase Activation Protein Gamma	GeneCard	2.57884
1110	TDGF1	Teratocarcinoma-Derived Growth Factor 1	GeneCard	2.57391
1111	PAM16	Presequence Translocase Associated Motor 16	GeneCard	2.57245
1112	FZD4	Frizzled Class Receptor 4	GeneCard	2.56886
1113	ALPL	Alkaline Phosphatase, Biomineralization Associated	GeneCard	2.5658
1114	CDC37	Cell Division Cycle 37, HSP90 Cochaperone	GeneCard	2.56376
1115	IGFBP5	Insulin Like Growth Factor Binding Protein 5	GeneCard	2.56295
1116	SMCHD1	Structural Maintenance Of Chromosomes Flexible Hinge Domain Containing 1	GeneCard	2.55918
1117	RPS17	Ribosomal Protein S17	GeneCard	2.55616
1118	TGFB2	Transforming Growth Factor Beta 2	GeneCard	2.55538
1119	MIF	Macrophage Migration Inhibitory Factor	GeneCard	2.55469
1120	SUCLG1	Succinate-CoA Ligase GDP/ADP-Forming Subunit Alpha	GeneCard	2.55352
1121	MIA3	MIA SH3 Domain ER Export Factor 3	GeneCard	2.55351
1122	IRF1	Interferon Regulatory Factor 1	GeneCard	2.55285
1123	H2AC18	H2A Clustered Histone 18	GeneCard	2.55055
1124	PROCR	Protein C Receptor	GeneCard	2.55002
1125	YAP1	Yes1 Associated Transcriptional Regulator	GeneCard	2.54837
1126	GAS1	Growth Arrest Specific 1	GeneCard	2.54457
1127	CWC27	CWC27 Spliceosome Associated Cyclophilin	GeneCard	2.54457
1128	PSG1	Pregnancy Specific Beta-1-Glycoprotein 1	GeneCard	2.54264
1129	KCNH2	Potassium Voltage-Gated Channel Subfamily H Member 2	GeneCard	2.54232
1130	SRD5A2	Steroid 5 Alpha-Reductase 2	GeneCard	2.53141
1131	COL13A1	Collagen Type XIII Alpha 1 Chain	GeneCard	2.52942
1132	CXCL9	C-X-C Motif Chemokine Ligand 9	GeneCard	2.52141
1133	COL6A1	Collagen Type VI Alpha 1 Chain	GeneCard	2.51809
1134	CNN2	Calponin 2	GeneCard	2.51552
1135	TTN	Titin	GeneCard	2.5147
1136	SDHD	Succinate Dehydrogenase Complex Subunit D	GeneCard	2.51442
1137	RNF14	Ring Finger Protein 14	GeneCard	2.51161
1138	MYL2	Myosin Light Chain 2	GeneCard	2.51159
1139	CLTC	Clathrin Heavy Chain	GeneCard	2.51139
1140	PLPBP	Pyridoxal Phosphate Binding Protein	GeneCard	2.51107
1141	TCOF1	Treacle Ribosome Biogenesis Factor 1	GeneCard	2.50943
1142	SATB1	SATB Homeobox 1	GeneCard	2.50739
1143	STT3A	STT3 Oligosaccharyltransferase Complex Catalytic Subunit A	GeneCard	2.50019
1144	PIEZO1	Piezo Type Mechanosensitive Ion Channel Component 1	GeneCard	2.49812
1145	PTS	6-Pyruvoyltetrahydropterin Synthase	GeneCard	2.49776
1146	MAD2L2	Mitotic Arrest Deficient 2 Like 2	GeneCard	2.49389
1147	ZNF569	Zinc Finger Protein 569	GeneCard	2.49175
1148	CLCN7	Chloride Voltage-Gated Channel 7	GeneCard	2.4899
1149	DLL3	Delta Like Canonical Notch Ligand 3	GeneCard	2.4899
1150	PKM	Pyruvate Kinase M1/2	GeneCard	2.48988
1151	NTRK3	Neurotrophic Receptor Tyrosine Kinase 3	GeneCard	2.48958
1152	CASR	Calcium Sensing Receptor	GeneCard	2.4892
1153	SNTB2	Syntrophin Beta 2	GeneCard	2.48759
1154	CYP17A1	Cytochrome P450 Family 17 Subfamily A Member 1	GeneCard	2.48579
1155	SLC6A4	Solute Carrier Family 6 Member 4	GeneCard	2.47817
1156	EIF5A	Eukaryotic Translation Initiation Factor 5A	GeneCard	2.47729
1157	UMOD	Uromodulin	GeneCard	2.47543
1158	ERBB4	Erb-B2 Receptor Tyrosine Kinase 4	GeneCard	2.47434
1159	RFC3	Replication Factor C Subunit 3	GeneCard	2.47188
1160	MIR21	MicroRNA 21	GeneCard	2.47006
1161	GCA	Grancalcin	GeneCard	2.46591
1162	TGFBR1	Transforming Growth Factor Beta Receptor 1	GeneCard	2.46498
1163	CRH	Corticotropin Releasing Hormone	GeneCard	2.46269
1164	KRIT1	KRIT1 Ankyrin Repeat Containing	GeneCard	2.45938
1165	LIPG	Lipase G, Endothelial Type	GeneCard	2.4568
1166	PAH	Phenylalanine Hydroxylase	GeneCard	2.45637
1167	ATP6AP1	ATPase H+ Transporting Accessory Protein 1	GeneCard	2.45616
1168	AIMP1	Aminoacyl TRNA Synthetase Complex Interacting Multifunctional Protein 1	GeneCard	2.45558
1169	CCL20	C-C Motif Chemokine Ligand 20	GeneCard	2.45382
1170	VPS13B	Vacuolar Protein Sorting 13 Homolog B	GeneCard	2.4536
1171	MYH11	Myosin Heavy Chain 11	GeneCard	2.45174
1172	RPS29	Ribosomal Protein S29	GeneCard	2.45108
1173	COX6B1	Cytochrome C Oxidase Subunit 6B1	GeneCard	2.4479
1174	POMGNT1	Protein O-Linked Mannose N-Acetylglucosaminyltransferase 1 (Beta 1,2-)	GeneCard	2.44676
1175	SRY	Sex Determining Region Y	GeneCard	2.43944
1176	HSPA4	Heat Shock Protein Family A (Hsp70) Member 4	GeneCard	2.43939
1177	PDE3B	Phosphodiesterase 3B	GeneCard	2.43903
1178	TIMP3	TIMP Metallopeptidase Inhibitor 3	GeneCard	2.43898
1179	NR3C1	Nuclear Receptor Subfamily 3 Group C Member 1	GeneCard	2.43587
1180	OXTR	Oxytocin Receptor	GeneCard	2.43517
1181	LIG1	DNA Ligase 1	GeneCard	2.42947
1182	CTLA4	Cytotoxic T-Lymphocyte Associated Protein 4	GeneCard	2.42841
1183	SIRT6	Sirtuin 6	GeneCard	2.4277
1184	C2CD4A	C2 Calcium Dependent Domain Containing 4A	GeneCard	2.42627
1185	C2CD4B	C2 Calcium Dependent Domain Containing 4B	GeneCard	2.42627
1186	CDX2	Caudal Type Homeobox 2	GeneCard	2.42284
1187	PRDX1	Peroxiredoxin 1	GeneCard	2.42176
1188	TRIM37	Tripartite Motif Containing 37	GeneCard	2.42154
1189	UFD1	Ubiquitin Recognition Factor In ER Associated Degradation 1	GeneCard	2.42154
1190	BCL2L1	BCL2 Like 1	GeneCard	2.4137
1191	LCN2	Lipocalin 2	GeneCard	2.40925
1192	KCNC4	Potassium Voltage-Gated Channel Subfamily C Member 4	GeneCard	2.40917
1193	PLA2G4E	Phospholipase A2 Group IVE	GeneCard	2.40917
1194	FAHD2A	Fumarylacetoacetate Hydrolase Domain Containing 2A	GeneCard	2.40917
1195	MIR4492	MicroRNA 4492	GeneCard	2.40917
1196	MIR3187	MicroRNA 3187	GeneCard	2.40917
1197	hsa-miR-1273d-001		GeneCard	2.40917
1198	TONSL	Tonsoku Like, DNA Repair Protein	GeneCard	2.4073
1199	PPBP	Pro-Platelet Basic Protein	GeneCard	2.40618
1200	TMEM107	Transmembrane Protein 107	GeneCard	2.40538
1201	ARHGAP24	Rho GTPase Activating Protein 24	GeneCard	2.40516
1202	RPS27A	Ribosomal Protein S27a	GeneCard	2.40401
1203	SMAD7	SMAD Family Member 7	GeneCard	2.403
1204	IDO1	Indoleamine 2,3-Dioxygenase 1	GeneCard	2.39564
1205	RAP2A	RAP2A, Member Of RAS Oncogene Family	GeneCard	2.39081
1206	SLC7A5	Solute Carrier Family 7 Member 5	GeneCard	2.38733
1207	NPY	Neuropeptide Y	GeneCard	2.38722
1208	MYH10	Myosin Heavy Chain 10	GeneCard	2.38621
1209	TM4SF20	Transmembrane 4 L Six Family Member 20	GeneCard	2.38613
1210	KRT14	Keratin 14	GeneCard	2.38562
1211	CHI3L1	Chitinase 3 Like 1	GeneCard	2.38105
1212	SPTLC1	Serine Palmitoyltransferase Long Chain Base Subunit 1	GeneCard	2.37909
1213	CCR3	C-C Motif Chemokine Receptor 3	GeneCard	2.37904
1214	CALM1	Calmodulin 1	GeneCard	2.37882
1215	RPS7	Ribosomal Protein S7	GeneCard	2.37545
1216	LEPR	Leptin Receptor	GeneCard	2.37424
1217	TIE1	Tyrosine Kinase With Immunoglobulin Like And EGF Like Domains 1	GeneCard	2.37404
1218	TIE1	Tyrosine Kinase With Immunoglobulin Like And EGF Like Domains 1	GeneCard	2.37404
1219	REN	Renin	GeneCard	2.37197
1220	LEMD2	LEM Domain Nuclear Envelope Protein 2	GeneCard	2.36968
1221	MYD88	MYD88 Innate Immune Signal Transduction Adaptor	GeneCard	2.36579
1222	CARS1	Cysteinyl-TRNA Synthetase 1	GeneCard	2.36073
1223	SCN5A	Sodium Voltage-Gated Channel Alpha Subunit 5	GeneCard	2.35827
1224	SMAD2	SMAD Family Member 2	GeneCard	2.35795
1225	PIGK	Phosphatidylinositol Glycan Anchor Biosynthesis Class K	GeneCard	2.35709
1226	HADHA	Hydroxyacyl-CoA Dehydrogenase Trifunctional Multienzyme Complex Subunit Alpha	GeneCard	2.35633
1227	CCNA2	Cyclin A2	GeneCard	2.35565
1228	PLK1	Polo Like Kinase 1	GeneCard	2.35562
1229	FBN2	Fibrillin 2	GeneCard	2.35413
1230	NGFR	Nerve Growth Factor Receptor	GeneCard	2.3526
1231	MDC1	Mediator Of DNA Damage Checkpoint 1	GeneCard	2.34622
1232	SETD2	SET Domain Containing 2, Histone Lysine Methyltransferase	GeneCard	2.3411
1233	CCND3	Cyclin D3	GeneCard	2.33984
1234	GGT1	Gamma-Glutamyltransferase 1	GeneCard	2.33891
1235	FBLN2	Fibulin 2	GeneCard	2.33756
1236	YWHAB	Tyrosine 3-Monooxygenase/Tryptophan 5-Monooxygenase Activation Protein Beta	GeneCard	2.33702
1237	TFRC	Transferrin Receptor	GeneCard	2.33699
1238	ERBIN	Erbb2 Interacting Protein	GeneCard	2.33417
1239	QRSL1	Glutaminyl-TRNA Amidotransferase Subunit QRSL1	GeneCard	2.33241
1240	NUP133	Nucleoporin 133	GeneCard	2.33241
1241	SHROOM3	Shroom Family Member 3	GeneCard	2.33034
1242	HFE	Homeostatic Iron Regulator	GeneCard	2.33019
1243	UBE3A	Ubiquitin Protein Ligase E3A	GeneCard	2.32708
1244	PRKN	Parkin RBR E3 Ubiquitin Protein Ligase	GeneCard	2.32618
1245	COL6A2	Collagen Type VI Alpha 2 Chain	GeneCard	2.32102
1246	FUT2	Fucosyltransferase 2	GeneCard	2.31999
1247	SGCE	Sarcoglycan Epsilon	GeneCard	2.31864
1248	FGF10	Fibroblast Growth Factor 10	GeneCard	2.31573
1249	SMN2	Survival Of Motor Neuron 2, Centromeric	GeneCard	2.31484
1250	AHSP	Alpha Hemoglobin Stabilizing Protein	GeneCard	2.31327
1251	CYCS	Cytochrome C, Somatic	GeneCard	2.31161
1252	TNFRSF1B	TNF Receptor Superfamily Member 1B	GeneCard	2.30909
1253	RBM10	RNA Binding Motif Protein 10	GeneCard	2.30672
1254	GATAD2B	GATA Zinc Finger Domain Containing 2B	GeneCard	2.30606
1255	YWHAQ	Tyrosine 3-Monooxygenase/Tryptophan 5-Monooxygenase Activation Protein Theta	GeneCard	2.30552
1256	EGFLAM	EGF Like, Fibronectin Type III And Laminin G Domains	GeneCard	2.30325
1257	CTCF	CCCTC-Binding Factor	GeneCard	2.30047
1258	LGALS2	Galectin 2	GeneCard	2.29943
1259	AHSG	Alpha 2-HS Glycoprotein	GeneCard	2.29813
1260	JMJD1C	Jumonji Domain Containing 1C	GeneCard	2.2971
1261	HNF1B	HNF1 Homeobox B	GeneCard	2.28741
1262	CREB1	CAMP Responsive Element Binding Protein 1	GeneCard	2.28661
1263	EDNRB	Endothelin Receptor Type B	GeneCard	2.28497
1264	RPL18	Ribosomal Protein L18	GeneCard	2.28053
1265	RNASEH2A	Ribonuclease H2 Subunit A	GeneCard	2.28036
1266	CST3	Cystatin C	GeneCard	2.2766
1267	SLPI	Secretory Leukocyte Peptidase Inhibitor	GeneCard	2.27247
1268	ERGIC1	Endoplasmic Reticulum-Golgi Intermediate Compartment 1	GeneCard	2.26537
1269	CYFIP1	Cytoplasmic FMR1 Interacting Protein 1	GeneCard	2.2646
1270	AZU1	Azurocidin 1	GeneCard	2.26419
1271	MARVELD2	MARVEL Domain Containing 2	GeneCard	2.26101
1272	CAMP	Cathelicidin Antimicrobial Peptide	GeneCard	2.2598
1273	COX15	Cytochrome C Oxidase Assembly Homolog COX15	GeneCard	2.2596
1274	SPTAN1	Spectrin Alpha, Non-Erythrocytic 1	GeneCard	2.2561
1275	STX1A	Syntaxin 1A	GeneCard	2.25557
1276	SLC2A4	Solute Carrier Family 2 Member 4	GeneCard	2.2548
1277	TSC2	TSC Complex Subunit 2	GeneCard	2.25264
1278	LRP5	LDL Receptor Related Protein 5	GeneCard	2.25101
1279	MSH3	MutS Homolog 3	GeneCard	2.25022
1280	PDCD10	Programmed Cell Death 10	GeneCard	2.24841
1281	XRCC6	X-Ray Repair Cross Complementing 6	GeneCard	2.24653
1282	PPARGC1A	PPARG Coactivator 1 Alpha	GeneCard	2.24337
1283	SMARCD1	SWI/SNF Related, Matrix Associated, Actin Dependent Regulator Of Chromatin, Subfamily D, Member 1	GeneCard	2.24243
1284	GATA5	GATA Binding Protein 5	GeneCard	2.24243
1285	XRCC5	X-Ray Repair Cross Complementing 5	GeneCard	2.24035
1286	SUSD2	Sushi Domain Containing 2	GeneCard	2.23957
1287	LRRC32	Leucine Rich Repeat Containing 32	GeneCard	2.2377
1288	WWOX	WW Domain Containing Oxidoreductase	GeneCard	2.23425
1289	RPL31	Ribosomal Protein L31	GeneCard	2.2339
1290	FGFR4	Fibroblast Growth Factor Receptor 4	GeneCard	2.2311
1291	ARAF	A-Raf Proto-Oncogene, Serine/Threonine Kinase	GeneCard	2.22962
1292	RPL9	Ribosomal Protein L9	GeneCard	2.22907
1293	MT-CYB	Mitochondrially Encoded Cytochrome B	GeneCard	2.22496
1294	MRPS34	Mitochondrial Ribosomal Protein S34	GeneCard	2.22495
1295	BTK	Bruton Tyrosine Kinase	GeneCard	2.22418
1296	B3GNT2	UDP-GlcNAc:BetaGal Beta-1,3-N-Acetylglucosaminyltransferase 2	GeneCard	2.22171
1297	SEMA3C	Semaphorin 3C	GeneCard	2.21773
1298	TENM4	Teneurin Transmembrane Protein 4	GeneCard	2.21711
1299	KRT8	Keratin 8	GeneCard	2.21652
1300	FOXC2	Forkhead Box C2	GeneCard	2.21295
1301	RPGRIP1L	RPGRIP1 Like	GeneCard	2.21202
1302	PTK6	Protein Tyrosine Kinase 6	GeneCard	2.21182
1303	ADAMTS9	ADAM Metallopeptidase With Thrombospondin Type 1 Motif 9	GeneCard	2.20883
1304	PEX2	Peroxisomal Biogenesis Factor 2	GeneCard	2.20043
1305	FLT3	Fms Related Receptor Tyrosine Kinase 3	GeneCard	2.19437
1306	PPP3CA	Protein Phosphatase 3 Catalytic Subunit Alpha	GeneCard	2.19289
1307	EPAS1	Endothelial PAS Domain Protein 1	GeneCard	2.19015
1308	RHO	Rhodopsin	GeneCard	2.18735
1309	SNU13	Small Nuclear Ribonucleoprotein 13	GeneCard	2.18695
1310	ZNF592	Zinc Finger Protein 592	GeneCard	2.18111
1311	ARL2	ADP Ribosylation Factor Like GTPase 2	GeneCard	2.1811
1312	ATP2A3	ATPase Sarcoplasmic/Endoplasmic Reticulum Ca2+ Transporting 3	GeneCard	2.1794
1313	GNB2	G Protein Subunit Beta 2	GeneCard	2.17901
1314	MYL6	Myosin Light Chain 6	GeneCard	2.17806
1315	PPP2CB	Protein Phosphatase 2 Catalytic Subunit Beta	GeneCard	2.17575
1316	CGNL1	Cingulin Like 1	GeneCard	2.17562
1317	SIN3A	SIN3 Transcription Regulator Family Member A	GeneCard	2.17408
1318	CTDP1	CTD Phosphatase Subunit 1	GeneCard	2.17408
1319	LEMD3	LEM Domain Containing 3	GeneCard	2.17408
1320	TRMT10A	TRNA Methyltransferase 10A	GeneCard	2.17408
1321	USB1	U6 SnRNA Biogenesis Phosphodiesterase 1	GeneCard	2.17408
1322	ADAT3	Adenosine Deaminase TRNA Specific 3	GeneCard	2.17408
1323	H4C1	H4 Clustered Histone 1	GeneCard	2.1723
1324	POMGNT2	Protein O-Linked Mannose N-Acetylglucosaminyltransferase 2 (Beta 1,4-)	GeneCard	2.17156
1325	PTGER4	Prostaglandin E Receptor 4	GeneCard	2.169
1326	CD69	CD69 Molecule	GeneCard	2.16705
1327	CDK4	Cyclin Dependent Kinase 4	GeneCard	2.16527
1328	CD38	CD38 Molecule	GeneCard	2.16504
1329	FCGR3B	Fc Gamma Receptor IIIb	GeneCard	2.16397
1330	IL18R1	Interleukin 18 Receptor 1	GeneCard	2.15988
1331	TH	Tyrosine Hydroxylase	GeneCard	2.1593
1332	SYP	Synaptophysin	GeneCard	2.15611
1333	RPL22	Ribosomal Protein L22	GeneCard	2.1561
1334	RPS4X	Ribosomal Protein S4 X-Linked	GeneCard	2.1561
1335	GLP1R	Glucagon Like Peptide 1 Receptor	GeneCard	2.15585
1336	STAR	Steroidogenic Acute Regulatory Protein	GeneCard	2.15542
1337	STAR	Steroidogenic Acute Regulatory Protein	GeneCard	2.15542
1338	RPL27	Ribosomal Protein L27	GeneCard	2.15532
1339	AURKA	Aurora Kinase A	GeneCard	2.15492
1340	KCNMA1	Potassium Calcium-Activated Channel Subfamily M Alpha 1	GeneCard	2.14512
1341	AKR1B1	Aldo-Keto Reductase Family 1 Member B	GeneCard	2.14501
1342	NDUFA13	NADH:Ubiquinone Oxidoreductase Subunit A13	GeneCard	2.14427
1343	APOC3	Apolipoprotein C3	GeneCard	2.14095
1344	NTRK2	Neurotrophic Receptor Tyrosine Kinase 2	GeneCard	2.13972
1345	TYMS	Thymidylate Synthetase	GeneCard	2.13922
1346	MECP2	Methyl-CpG Binding Protein 2	GeneCard	2.13767
1347	PDCD1	Programmed Cell Death 1	GeneCard	2.13734
1348	CBS	Cystathionine Beta-Synthase	GeneCard	2.13725
1349	TLR9	Toll Like Receptor 9	GeneCard	2.13408
1350	KCNQ1OT1	KCNQ1 Opposite Strand/Antisense Transcript 1	GeneCard	2.13389
1351	LOC107133510	Origin Of Replication At HBB	GeneCard	2.13328
1352	SEC23B	SEC23 Homolog B, COPII Coat Complex Component	GeneCard	2.13011
1353	SLC6A3	Solute Carrier Family 6 Member 3	GeneCard	2.12904
1354	XPA	XPA, DNA Damage Recognition And Repair Factor	GeneCard	2.12799
1355	MAP3K1	Mitogen-Activated Protein Kinase Kinase Kinase 1	GeneCard	2.12457
1356	PLXNA2	Plexin A2	GeneCard	2.1245
1357	LRP8	LDL Receptor Related Protein 8	GeneCard	2.12267
1358	MCM3	Minichromosome Maintenance Complex Component 3	GeneCard	2.12191
1359	SYDE1	Synapse Defective Rho GTPase Homolog 1	GeneCard	2.12011
1360	SNX9	Sorting Nexin 9	GeneCard	2.11869
1361	TUBB2A	Tubulin Beta 2A Class IIa	GeneCard	2.11658
1362	MYH2	Myosin Heavy Chain 2	GeneCard	2.11569
1363	RRAS2	RAS Related 2	GeneCard	2.1156
1364	DLAT	Dihydrolipoamide S-Acetyltransferase	GeneCard	2.11501
1365	AGRN	Agrin	GeneCard	2.11317
1366	IRAK1	Interleukin 1 Receptor Associated Kinase 1	GeneCard	2.11168
1367	ACP5	Acid Phosphatase 5, Tartrate Resistant	GeneCard	2.10997
1368	GAL	Galanin And GMAP Prepropeptide	GeneCard	2.10842
1369	RNASET2	Ribonuclease T2	GeneCard	2.10819
1370	MSTN	Myostatin	GeneCard	2.10639
1371	HLA-B	Major Histocompatibility Complex, Class I, B	GeneCard	2.10495
1372	TUBB4B	Tubulin Beta 4B Class IVb	GeneCard	2.09872
1373	NQO1	NAD(P)H Quinone Dehydrogenase 1	GeneCard	2.09666
1374	MYCN	MYCN Proto-Oncogene, BHLH Transcription Factor	GeneCard	2.09634
1375	TRIM28	Tripartite Motif Containing 28	GeneCard	2.09518
1376	KYNU	Kynureninase	GeneCard	2.0906
1377	NRAS	NRAS Proto-Oncogene, GTPase	GeneCard	2.08898
1378	ARFGEF1	ADP Ribosylation Factor Guanine Nucleotide Exchange Factor 1	GeneCard	2.08596
1379	NTRK1	Neurotrophic Receptor Tyrosine Kinase 1	GeneCard	2.08529
1380	SLC29A3	Solute Carrier Family 29 Member 3	GeneCard	2.079
1381	ADRB2	Adrenoceptor Beta 2	GeneCard	2.07879
1382	LBR	Lamin B Receptor	GeneCard	2.07841
1383	WNT7B	Wnt Family Member 7B	GeneCard	2.07684
1384	TBL2	Transducin Beta Like 2	GeneCard	2.07684
1385	GRB10	Growth Factor Receptor Bound Protein 10	GeneCard	2.07619
1386	EFTUD2	Elongation Factor Tu GTP Binding Domain Containing 2	GeneCard	2.07337
1387	RPL6	Ribosomal Protein L6	GeneCard	2.06918
1388	MRPL12	Mitochondrial Ribosomal Protein L12	GeneCard	2.06813
1389	APLN	Apelin	GeneCard	2.06739
1390	LRP2	LDL Receptor Related Protein 2	GeneCard	2.06562
1391	MMP26	Matrix Metallopeptidase 26	GeneCard	2.06477
1392	EIF4H	Eukaryotic Translation Initiation Factor 4H	GeneCard	2.0609
1393	MT-CO1	Mitochondrially Encoded Cytochrome C Oxidase I	GeneCard	2.05853
1394	RIN2	Ras And Rab Interactor 2	GeneCard	2.05795
1395	SLC2A3	Solute Carrier Family 2 Member 3	GeneCard	2.0563
1396	FCGR1A	Fc Gamma Receptor Ia	GeneCard	2.0552
1397	NKX3-2	NK3 Homeobox 2	GeneCard	2.05499
1398	CHEK1	Checkpoint Kinase 1	GeneCard	2.05433
1399	S100A10	S100 Calcium Binding Protein A10	GeneCard	2.04767
1400	KIF7	Kinesin Family Member 7	GeneCard	2.04739
1401	SREBF1	Sterol Regulatory Element Binding Transcription Factor 1	GeneCard	2.0473
1402	DES	Desmin	GeneCard	2.04553
1403	SIRT2	Sirtuin 2	GeneCard	2.04485
1404	AQP1	Aquaporin 1 (Colton Blood Group)	GeneCard	2.04439
1405	TUBG1	Tubulin Gamma 1	GeneCard	2.03684
1406	MAGI2	Membrane Associated Guanylate Kinase, WW And PDZ Domain Containing 2	GeneCard	2.03346
1407	F9	Coagulation Factor IX	GeneCard	2.03344
1408	CFI	Complement Factor I	GeneCard	2.03312
1409	SLC2A1	Solute Carrier Family 2 Member 1	GeneCard	2.03016
1410	FBL	Fibrillarin	GeneCard	2.02899
1411	PHB1	Prohibitin 1	GeneCard	2.02874
1412	WTIP	WT1 Interacting Protein	GeneCard	2.02869
1413	MIR210	MicroRNA 210	GeneCard	2.02683
1414	JPH4	Junctophilin 4	GeneCard	2.02602
1415	HSP90AB1	Heat Shock Protein 90 Alpha Family Class B Member 1	GeneCard	2.02534
1416	CASP1	Caspase 1	GeneCard	2.02354
1417	MCM6	Minichromosome Maintenance Complex Component 6	GeneCard	2.02294
1418	EIF2B5	Eukaryotic Translation Initiation Factor 2B Subunit Epsilon	GeneCard	2.02271
1419	VDR	Vitamin D Receptor	GeneCard	2.01943
1420	EIF2AK2	Eukaryotic Translation Initiation Factor 2 Alpha Kinase 2	GeneCard	2.01415
1421	YARS1	Tyrosyl-TRNA Synthetase 1	GeneCard	2.01044
1422	DBH	Dopamine Beta-Hydroxylase	GeneCard	2.00792
1423	PON1	Paraoxonase 1	GeneCard	2.00722
1424	SPECC1L	Sperm Antigen With Calponin Homology And Coiled-Coil Domains 1 Like	GeneCard	2.00579
1425	PLA2G6	Phospholipase A2 Group VI	GeneCard	2.00486
1426	NPAP1	Nuclear Pore Associated Protein 1	GeneCard	2.00302
1427	GALNS	Galactosamine (N-Acetyl)-6-Sulfatase	GeneCard	1.99881
1428	CALCR	Calcitonin Receptor	GeneCard	1.99732
1429	PRKACA	Protein Kinase CAMP-Activated Catalytic Subunit Alpha	GeneCard	1.99677
1430	SOD2	Superoxide Dismutase 2	GeneCard	1.99492
1431	PAG1	Phosphoprotein Membrane Anchor With Glycosphingolipid Microdomains 1	GeneCard	1.99422
1432	NR3C2	Nuclear Receptor Subfamily 3 Group C Member 2	GeneCard	1.99249
1433	PIGF	Phosphatidylinositol Glycan Anchor Biosynthesis Class F	GeneCard	1.98806
1434	ELMO1	Engulfment And Cell Motility 1	GeneCard	1.98682
1435	CDX1	Caudal Type Homeobox 1	GeneCard	1.98677
1436	NLRP5	NLR Family Pyrin Domain Containing 5	GeneCard	1.98532
1437	ESM1	Endothelial Cell Specific Molecule 1	GeneCard	1.985
1438	CFDP1	Craniofacial Development Protein 1	GeneCard	1.98428
1439	CDK6	Cyclin Dependent Kinase 6	GeneCard	1.98348
1440	PPP1R13L	Protein Phosphatase 1 Regulatory Subunit 13 Like	GeneCard	1.98091
1441	PTGER1	Prostaglandin E Receptor 1	GeneCard	1.98042
1442	CLIP2	CAP-Gly Domain Containing Linker Protein 2	GeneCard	1.98022
1443	SERPINA3	Serpin Family A Member 3	GeneCard	1.98018
1444	NDRG1	N-Myc Downstream Regulated 1	GeneCard	1.97898
1445	SEMA4D	Semaphorin 4D	GeneCard	1.97889
1446	CDK13	Cyclin Dependent Kinase 13	GeneCard	1.976
1447	CAPN3	Calpain 3	GeneCard	1.97344
1448	IL33	Interleukin 33	GeneCard	1.97211
1449	NOD1	Nucleotide Binding Oligomerization Domain Containing 1	GeneCard	1.97158
1450	FOXO1	Forkhead Box O1	GeneCard	1.97123
1451	PROS1	Protein S	GeneCard	1.96914
1452	ENO2	Enolase 2	GeneCard	1.96906
1453	USP34	Ubiquitin Specific Peptidase 34	GeneCard	1.96792
1454	BIVM-ERCC5	BIVM-ERCC5 Readthrough	GeneCard	1.96792
1455	ADAMTSL4	ADAMTS Like 4	GeneCard	1.96785
1456	TGFBR2	Transforming Growth Factor Beta Receptor 2	GeneCard	1.96705
1457	ADAMTS4	ADAM Metallopeptidase With Thrombospondin Type 1 Motif 4	GeneCard	1.96436
1458	TCF7L2	Transcription Factor 7 Like 2	GeneCard	1.96324
1459	MIR675	MicroRNA 675	GeneCard	1.95899
1460	CSN1S1	Casein Alpha S1	GeneCard	1.95851
1461	SLC12A2	Solute Carrier Family 12 Member 2	GeneCard	1.95399
1462	LGALS4	Galectin 4	GeneCard	1.95265
1463	UNK	Unk Zinc Finger	GeneCard	1.95174
1464	MIR584	MicroRNA 584	GeneCard	1.95174
1465	SBDS	SBDS Ribosome Maturation Factor	GeneCard	1.95172
1466	TSHR	Thyroid Stimulating Hormone Receptor	GeneCard	1.95169
1467	TFPI	Tissue Factor Pathway Inhibitor	GeneCard	1.95104
1468	DDB1	Damage Specific DNA Binding Protein 1	GeneCard	1.94728
1469	ROR2	Receptor Tyrosine Kinase Like Orphan Receptor 2	GeneCard	1.94403
1470	NANOG	Nanog Homeobox	GeneCard	1.94123
1471	TRPV4	Transient Receptor Potential Cation Channel Subfamily V Member 4	GeneCard	1.94109
1472	SFTPD	Surfactant Protein D	GeneCard	1.93981
1473	ADAR	Adenosine Deaminase RNA Specific	GeneCard	1.93499
1474	EPB41L3	Erythrocyte Membrane Protein Band 4.1 Like 3	GeneCard	1.93333
1475	HDAC9	Histone Deacetylase 9	GeneCard	1.93285
1476	GRIP1	Glutamate Receptor Interacting Protein 1	GeneCard	1.93124
1477	GRIP1	Glutamate Receptor Interacting Protein 1	GeneCard	1.93124
1478	SOST	Sclerostin	GeneCard	1.92878
1479	MIR9-1	MicroRNA 9-1	GeneCard	1.92861
1480	KRT5	Keratin 5	GeneCard	1.9261
1481	IL4R	Interleukin 4 Receptor	GeneCard	1.92492
1482	ZNF436	Zinc Finger Protein 436	GeneCard	1.9226
1483	CGB7	Chorionic Gonadotropin Subunit Beta 7	GeneCard	1.92159
1484	MCM2	Minichromosome Maintenance Complex Component 2	GeneCard	1.91792
1485	S100A12	S100 Calcium Binding Protein A12	GeneCard	1.91786
1486	CFP	Complement Factor Properdin	GeneCard	1.9157
1487	BMP10	Bone Morphogenetic Protein 10	GeneCard	1.91361
1488	NUMB	NUMB Endocytic Adaptor Protein	GeneCard	1.91134
1489	CHST3	Carbohydrate Sulfotransferase 3	GeneCard	1.90945
1490	RBP4	Retinol Binding Protein 4	GeneCard	1.90527
1491	DEFB4A	Defensin Beta 4A	GeneCard	1.90499
1492	CD79A	CD79a Molecule	GeneCard	1.9035
1493	H4C11	H4 Clustered Histone 11	GeneCard	1.90289
1494	H4C12	H4 Clustered Histone 12	GeneCard	1.90289
1495	G3BP1	G3BP Stress Granule Assembly Factor 1	GeneCard	1.89631
1496	HBS1L	HBS1 Like Translational GTPase	GeneCard	1.89469
1497	CTSD	Cathepsin D	GeneCard	1.89181
1498	CRB1	Crumbs Cell Polarity Complex Component 1	GeneCard	1.88504
1499	ALYREF	Aly/REF Export Factor	GeneCard	1.88438
1500	STX3	Syntaxin 3	GeneCard	1.88414
1501	VLDLR	Very Low Density Lipoprotein Receptor	GeneCard	1.88133
1502	CCL7	C-C Motif Chemokine Ligand 7	GeneCard	1.88027
1503	MARVELD3	MARVEL Domain Containing 3	GeneCard	1.87959
1504	BCL11A	BAF Chromatin Remodeling Complex Subunit BCL11A	GeneCard	1.87956
1505	GNRH2	Gonadotropin Releasing Hormone 2	GeneCard	1.87907
1506	LOC117307477	CD209 Promoter Region	GeneCard	1.87611
1507	SNRNP200	Small Nuclear Ribonucleoprotein U5 Subunit 200	GeneCard	1.87197
1508	WDR62	WD Repeat Domain 62	GeneCard	1.87131
1509	ABCB1	ATP Binding Cassette Subfamily B Member 1	GeneCard	1.87123
1510	MT-CO3	Mitochondrially Encoded Cytochrome C Oxidase III	GeneCard	1.87002
1511	HMGA1	High Mobility Group AT-Hook 1	GeneCard	1.86491
1512	NES	Nestin	GeneCard	1.86456
1513	NCOA3	Nuclear Receptor Coactivator 3	GeneCard	1.86203
1514	CDC25A	Cell Division Cycle 25A	GeneCard	1.86127
1515	CHN2	Chimerin 2	GeneCard	1.85998
1516	CHN2	Chimerin 2	GeneCard	1.85998
1517	LAP3	Leucine Aminopeptidase 3	GeneCard	1.85985
1518	STAP2	Signal Transducing Adaptor Family Member 2	GeneCard	1.85934
1519	SOCS3	Suppressor Of Cytokine Signaling 3	GeneCard	1.85755
1520	ATP2B3	ATPase Plasma Membrane Ca2+ Transporting 3	GeneCard	1.85644
1521	TPM2	Tropomyosin 2	GeneCard	1.85501
1522	LAMP1	Lysosomal Associated Membrane Protein 1	GeneCard	1.85384
1523	LIMK2	LIM Domain Kinase 2	GeneCard	1.85222
1524	KANK2	KN Motif And Ankyrin Repeat Domains 2	GeneCard	1.84882
1525	PWAR1	Prader Willi/Angelman Region RNA 1	GeneCard	1.84822
1526	IMMT	Inner Membrane Mitochondrial Protein	GeneCard	1.84595
1527	SYNJ2	Synaptojanin 2	GeneCard	1.84593
1528	MYH6	Myosin Heavy Chain 6	GeneCard	1.84573
1529	PPP2R5C	Protein Phosphatase 2 Regulatory Subunit B'Gamma	GeneCard	1.84497
1530	TMEM231	Transmembrane Protein 231	GeneCard	1.84425
1531	TYRO3	TYRO3 Protein Tyrosine Kinase	GeneCard	1.83797
1532	TERF2IP	TERF2 Interacting Protein	GeneCard	1.83656
1533	SLC4A2	Solute Carrier Family 4 Member 2	GeneCard	1.83558
1534	RPL7	Ribosomal Protein L7	GeneCard	1.83431
1535	PLEKHG5	Pleckstrin Homology And RhoGEF Domain Containing G5	GeneCard	1.83328
1536	IGFBP6	Insulin Like Growth Factor Binding Protein 6	GeneCard	1.83073
1537	IL16	Interleukin 16	GeneCard	1.82979
1538	WHAMM	WASP Homolog Associated With Actin, Golgi Membranes And Microtubules	GeneCard	1.82758
1539	NACA	Nascent Polypeptide Associated Complex Subunit Alpha	GeneCard	1.82678
1540	MKLN1	Muskelin 1	GeneCard	1.82505
1541	HSD11B1	Hydroxysteroid 11-Beta Dehydrogenase 1	GeneCard	1.82475
1542	APEX1	Apurinic/Apyrimidinic Endodeoxyribonuclease 1	GeneCard	1.82457
1543	H4C13	H4 Clustered Histone 13	GeneCard	1.82423
1544	CP	Ceruloplasmin	GeneCard	1.81932
1545	EPX	Eosinophil Peroxidase	GeneCard	1.81725
1546	RPS15	Ribosomal Protein S15	GeneCard	1.81565
1547	LRP6	LDL Receptor Related Protein 6	GeneCard	1.81277
1548	IL12B	Interleukin 12B	GeneCard	1.81251
1549	SMAD6	SMAD Family Member 6	GeneCard	1.81156
1550	LRRK2	Leucine Rich Repeat Kinase 2	GeneCard	1.8098
1551	RUVBL2	RuvB Like AAA ATPase 2	GeneCard	1.8097
1552	CYP21A2	Cytochrome P450 Family 21 Subfamily A Member 2	GeneCard	1.80608
1553	MALT1	MALT1 Paracaspase	GeneCard	1.80526
1554	SLC16A1	Solute Carrier Family 16 Member 1	GeneCard	1.80337
1555	EPRS1	Glutamyl-Prolyl-TRNA Synthetase 1	GeneCard	1.80263
1556	PGBD3	PiggyBac Transposable Element Derived 3	GeneCard	1.80166
1557	CNN1	Calponin 1	GeneCard	1.80021
1558	FBXO11	F-Box Protein 11	GeneCard	1.8
1559	SIRT1	Sirtuin 1	GeneCard	1.7999
1560	SGO1	Shugoshin 1	GeneCard	1.7994
1561	CXCR5	C-X-C Motif Chemokine Receptor 5	GeneCard	1.7991
1562	RTN4R	Reticulon 4 Receptor	GeneCard	1.79634
1563	COL11A1	Collagen Type XI Alpha 1 Chain	GeneCard	1.79534
1564	EGR1	Early Growth Response 1	GeneCard	1.79192
1565	DYNC1H1	Dynein Cytoplasmic 1 Heavy Chain 1	GeneCard	1.78999
1566	STX16	Syntaxin 16	GeneCard	1.78849
1567	GDF15	Growth Differentiation Factor 15	GeneCard	1.78556
1568	MXRA5	Matrix Remodeling Associated 5	GeneCard	1.78462
1569	TUBB3	Tubulin Beta 3 Class III	GeneCard	1.77978
1570	TYMP	Thymidine Phosphorylase	GeneCard	1.77903
1571	CHRNA7	Cholinergic Receptor Nicotinic Alpha 7 Subunit	GeneCard	1.77565
1572	CAV3	Caveolin 3	GeneCard	1.7717
1573	PRRC2A	Proline Rich Coiled-Coil 2A	GeneCard	1.76593
1574	VSX2	Visual System Homeobox 2	GeneCard	1.76397
1575	H4C16	H4 Histone 16	GeneCard	1.7634
1576	NSUN5	NOP2/Sun RNA Methyltransferase 5	GeneCard	1.76182
1577	CBLB	Cbl Proto-Oncogene B	GeneCard	1.76025
1578	NOTCH4	Notch Receptor 4	GeneCard	1.75899
1579	KMT2B	Lysine Methyltransferase 2B	GeneCard	1.75874
1580	CPE	Carboxypeptidase E	GeneCard	1.75867
1581	RPS15A	Ribosomal Protein S15a	GeneCard	1.75804
1582	C12orf57	Chromosome 12 Open Reading Frame 57	GeneCard	1.75704
1583	CCL17	C-C Motif Chemokine Ligand 17	GeneCard	1.75678
1584	DIS3	DIS3 Homolog, Exosome Endoribonuclease And 3'-5' Exoribonuclease	GeneCard	1.75585
1585	KLF2	KLF Transcription Factor 2	GeneCard	1.75386
1586	MIR30A	MicroRNA 30a	GeneCard	1.75375
1587	USP7	Ubiquitin Specific Peptidase 7	GeneCard	1.75341
1588	H4C15	H4 Clustered Histone 15	GeneCard	1.75289
1589	RECQL	RecQ Like Helicase	GeneCard	1.75175
1590	MT-CO2	Mitochondrially Encoded Cytochrome C Oxidase II	GeneCard	1.7507
1591	OTOA	Otoancorin	GeneCard	1.74656
1592	EXOSC6	Exosome Component 6	GeneCard	1.74239
1593	DOCK5	Dedicator Of Cytokinesis 5	GeneCard	1.73564
1594	PIK3C3	Phosphatidylinositol 3-Kinase Catalytic Subunit Type 3	GeneCard	1.73504
1595	NTN4	Netrin 4	GeneCard	1.73348
1596	TPM4	Tropomyosin 4	GeneCard	1.73166
1597	UPF1	UPF1 RNA Helicase And ATPase	GeneCard	1.73105
1598	H4C8	H4 Clustered Histone 8	GeneCard	1.73009
1599	CNR1	Cannabinoid Receptor 1	GeneCard	1.72808
1600	GPC5	Glypican 5	GeneCard	1.72771
1601	ALDH1A1	Aldehyde Dehydrogenase 1 Family Member A1	GeneCard	1.72697
1602	TXNDC15	Thioredoxin Domain Containing 15	GeneCard	1.72672
1603	BIN1	Bridging Integrator 1	GeneCard	1.72182
1604	H4C2	H4 Clustered Histone 2	GeneCard	1.72173
1605	H4C3	H4 Clustered Histone 3	GeneCard	1.72173
1606	H4C9	H4 Clustered Histone 9	GeneCard	1.72173
1607	H4C14	H4 Clustered Histone 14	GeneCard	1.72173
1608	H4C4	H4 Clustered Histone 4	GeneCard	1.72173
1609	H4C5	H4 Clustered Histone 5	GeneCard	1.72173
1610	H4C6	H4 Clustered Histone 6	GeneCard	1.72173
1611	EYA1	EYA Transcriptional Coactivator And Phosphatase 1	GeneCard	1.72123
1612	NPPC	Natriuretic Peptide C	GeneCard	1.72117
1613	PNPLA2	Patatin Like Phospholipase Domain Containing 2	GeneCard	1.72105
1614	MIR590	MicroRNA 590	GeneCard	1.72105
1615	STK39	Serine/Threonine Kinase 39	GeneCard	1.72004
1616	BCL6	BCL6 Transcription Repressor	GeneCard	1.71645
1617	RPL26	Ribosomal Protein L26	GeneCard	1.71616
1618	MYO5B	Myosin VB	GeneCard	1.71476
1619	MIR17	MicroRNA 17	GeneCard	1.71376
1620	YBX1	Y-Box Binding Protein 1	GeneCard	1.71146
1621	ACAD9	Acyl-CoA Dehydrogenase Family Member 9	GeneCard	1.71093
1622	TSR1	TSR1 Ribosome Maturation Factor	GeneCard	1.71057
1623	MC1R	Melanocortin 1 Receptor	GeneCard	1.70808
1624	SOS2	SOS Ras/Rho Guanine Nucleotide Exchange Factor 2	GeneCard	1.70508
1625	NTF4	Neurotrophin 4	GeneCard	1.7029
1626	SLC7A8	Solute Carrier Family 7 Member 8	GeneCard	1.70265
1627	HACD3	3-Hydroxyacyl-CoA Dehydratase 3	GeneCard	1.70242
1628	HCFC1	Host Cell Factor C1	GeneCard	1.70187
1629	NEK1	NIMA Related Kinase 1	GeneCard	1.69841
1630	RAB6A	RAB6A, Member RAS Oncogene Family	GeneCard	1.69739
1631	ECM2	Extracellular Matrix Protein 2	GeneCard	1.69469
1632	CYBA	Cytochrome B-245 Alpha Chain	GeneCard	1.69306
1633	WRN	WRN RecQ Like Helicase	GeneCard	1.69296
1634	BNIP3	BCL2 Interacting Protein 3	GeneCard	1.69041
1635	PPIH	Peptidylprolyl Isomerase H	GeneCard	1.68901
1636	WNK1	WNK Lysine Deficient Protein Kinase 1	GeneCard	1.68882
1637	H2AX	H2A.X Variant Histone	GeneCard	1.68764
1638	VAMP7	Vesicle Associated Membrane Protein 7	GeneCard	1.68759
1639	SALL1	Spalt Like Transcription Factor 1	GeneCard	1.6867
1640	EIF6	Eukaryotic Translation Initiation Factor 6	GeneCard	1.68661
1641	SSTR2	Somatostatin Receptor 2	GeneCard	1.68632
1642	HAND2	Heart And Neural Crest Derivatives Expressed 2	GeneCard	1.68532
1643	PRNP	Prion Protein	GeneCard	1.68476
1644	ITSN1	Intersectin 1	GeneCard	1.68288
1645	KIF23	Kinesin Family Member 23	GeneCard	1.68206
1646	LEFTY2	Left-Right Determination Factor 2	GeneCard	1.68116
1647	HLA-A	Major Histocompatibility Complex, Class I, A	GeneCard	1.6807
1648	HP	Haptoglobin	GeneCard	1.68051
1649	LGALS13	Galectin 13	GeneCard	1.67911
1650	HBG2	Hemoglobin Subunit Gamma 2	GeneCard	1.67749
1651	HLA-DQB1	Major Histocompatibility Complex, Class II, DQ Beta 1	GeneCard	1.67667
1652	TUBA8	Tubulin Alpha 8	GeneCard	1.67666
1653	IHH	Indian Hedgehog Signaling Molecule	GeneCard	1.67343
1654	NR1H4	Nuclear Receptor Subfamily 1 Group H Member 4	GeneCard	1.67331
1655	LOXL3	Lysyl Oxidase Like 3	GeneCard	1.67172
1656	TBCD	Tubulin Folding Cofactor D	GeneCard	1.66831
1657	NFAT5	Nuclear Factor Of Activated T Cells 5	GeneCard	1.66709
1658	RPS28	Ribosomal Protein S28	GeneCard	1.66488
1659	SLC38A2	Solute Carrier Family 38 Member 2	GeneCard	1.6631
1660	HPGD	15-Hydroxyprostaglandin Dehydrogenase	GeneCard	1.66302
1661	SFXN2	Sideroflexin 2	GeneCard	1.66118
1662	MYH7	Myosin Heavy Chain 7	GeneCard	1.66094
1663	DRD2	Dopamine Receptor D2	GeneCard	1.65995
1664	RAB11A	RAB11A, Member RAS Oncogene Family	GeneCard	1.65944
1665	PPP2R5E	Protein Phosphatase 2 Regulatory Subunit B'Epsilon	GeneCard	1.65916
1666	RXRA	Retinoid X Receptor Alpha	GeneCard	1.65818
1667	HPX	Hemopexin	GeneCard	1.65812
1668	ADAMTS2	ADAM Metallopeptidase With Thrombospondin Type 1 Motif 2	GeneCard	1.65717
1669	PTGER3	Prostaglandin E Receptor 3	GeneCard	1.65689
1670	CEBPB	CCAAT Enhancer Binding Protein Beta	GeneCard	1.65557
1671	SERPINF2	Serpin Family F Member 2	GeneCard	1.65068
1672	DLG2	Discs Large MAGUK Scaffold Protein 2	GeneCard	1.65065
1673	APC2	APC Regulator Of WNT Signaling Pathway 2	GeneCard	1.65009
1674	MSX2	Msh Homeobox 2	GeneCard	1.6475
1675	CKB	Creatine Kinase B	GeneCard	1.64605
1676	PDE5A	Phosphodiesterase 5A	GeneCard	1.64576
1677	KAT6B	Lysine Acetyltransferase 6B	GeneCard	1.64257
1678	NCOA2	Nuclear Receptor Coactivator 2	GeneCard	1.64234
1679	IRS4	Insulin Receptor Substrate 4	GeneCard	1.64225
1680	SPTB	Spectrin Beta, Erythrocytic	GeneCard	1.6413
1681	CDK2	Cyclin Dependent Kinase 2	GeneCard	1.64106
1682	ATP5F1B	ATP Synthase F1 Subunit Beta	GeneCard	1.63832
1683	CDK5RAP2	CDK5 Regulatory Subunit Associated Protein 2	GeneCard	1.6361
1684	PRKAA1	Protein Kinase AMP-Activated Catalytic Subunit Alpha 1	GeneCard	1.63597
1685	LOC106099062	HBB Recombination Region	GeneCard	1.6343
1686	RPL15	Ribosomal Protein L15	GeneCard	1.63346
1687	GCG	Glucagon	GeneCard	1.63317
1688	PRTN3	Proteinase 3	GeneCard	1.63208
1689	INHBB	Inhibin Subunit Beta B	GeneCard	1.63048
1690	KRT16	Keratin 16	GeneCard	1.62973
1691	CEP63	Centrosomal Protein 63	GeneCard	1.62967
1692	GRIN2A	Glutamate Ionotropic Receptor NMDA Type Subunit 2A	GeneCard	1.62907
1693	MYL4	Myosin Light Chain 4	GeneCard	1.62757
1694	CCND2	Cyclin D2	GeneCard	1.62616
1695	PSMC6	Proteasome 26S Subunit, ATPase 6	GeneCard	1.62573
1696	IGF2BP2	Insulin Like Growth Factor 2 MRNA Binding Protein 2	GeneCard	1.62457
1697	RIGI	RNA Sensor RIG-I	GeneCard	1.62404
1698	MYH8	Myosin Heavy Chain 8	GeneCard	1.62213
1699	TG	Thyroglobulin	GeneCard	1.62168
1700	ICOSLG	Inducible T Cell Costimulator Ligand	GeneCard	1.62119
1701	SUB1	SUB1 Regulator Of Transcription	GeneCard	1.61931
1702	PRF1	Perforin 1	GeneCard	1.61911
1703	FABP1	Fatty Acid Binding Protein 1	GeneCard	1.61745
1704	AURKB	Aurora Kinase B	GeneCard	1.61616
1705	PLOD2	Procollagen-Lysine,2-Oxoglutarate 5-Dioxygenase 2	GeneCard	1.61336
1706	PRPF8	Pre-MRNA Processing Factor 8	GeneCard	1.61268
1707	SIK2	Salt Inducible Kinase 2	GeneCard	1.60756
1708	BLOC1S1	Biogenesis Of Lysosomal Organelles Complex 1 Subunit 1	GeneCard	1.6075
1709	CDK7	Cyclin Dependent Kinase 7	GeneCard	1.60509
1710	PITX1	Paired Like Homeodomain 1	GeneCard	1.6048
1711	PTGS1	Prostaglandin-Endoperoxide Synthase 1	GeneCard	1.60372
1712	MTIF2	Mitochondrial Translational Initiation Factor 2	GeneCard	1.60325
1713	SFRP1	Secreted Frizzled Related Protein 1	GeneCard	1.60308
1714	MEPE	Matrix Extracellular Phosphoglycoprotein	GeneCard	1.60258
1715	TIMM50	Translocase Of Inner Mitochondrial Membrane 50	GeneCard	1.59953
1716	GRIN2B	Glutamate Ionotropic Receptor NMDA Type Subunit 2B	GeneCard	1.59801
1717	INHBA	Inhibin Subunit Beta A	GeneCard	1.59773
1718	CHRD	Chordin	GeneCard	1.59743
1719	PAX3	Paired Box 3	GeneCard	1.59707
1720	RASGRF1	Ras Protein Specific Guanine Nucleotide Releasing Factor 1	GeneCard	1.59682
1721	IFI27	Interferon Alpha Inducible Protein 27	GeneCard	1.59143
1722	KLF1	KLF Transcription Factor 1	GeneCard	1.59128
1723	GPX1	Glutathione Peroxidase 1	GeneCard	1.58952
1724	RAPGEF2	Rap Guanine Nucleotide Exchange Factor 2	GeneCard	1.58797
1725	LTBP4	Latent Transforming Growth Factor Beta Binding Protein 4	GeneCard	1.58617
1726	RPE65	Retinoid Isomerohydrolase RPE65	GeneCard	1.58598
1727	PLA2R1	Phospholipase A2 Receptor 1	GeneCard	1.58521
1728	PPL	Periplakin	GeneCard	1.58424
1729	SOCS1	Suppressor Of Cytokine Signaling 1	GeneCard	1.5835
1730	ZCCHC8	Zinc Finger CCHC-Type Containing 8	GeneCard	1.58144
1731	ATP5MK	ATP Synthase Membrane Subunit K	GeneCard	1.58144
1732	MYL11	Myosin Light Chain 11	GeneCard	1.57862
1733	TECTA	Tectorin Alpha	GeneCard	1.5776
1734	EIF2B4	Eukaryotic Translation Initiation Factor 2B Subunit Delta	GeneCard	1.57745
1735	HAX1	HCLS1 Associated Protein X-1	GeneCard	1.57624
1736	C3	Complement C3	GeneCard	1.57472
1737	OCA2	OCA2 Melanosomal Transmembrane Protein	GeneCard	1.5744
1738	PWRN1	Prader-Willi Region Non-Protein Coding RNA 1	GeneCard	1.5744
1739	MAP3K3	Mitogen-Activated Protein Kinase Kinase Kinase 3	GeneCard	1.57097
1740	LATS1	Large Tumor Suppressor Kinase 1	GeneCard	1.57073
1741	PLOD1	Procollagen-Lysine,2-Oxoglutarate 5-Dioxygenase 1	GeneCard	1.56989
1742	AGPAT1	1-Acylglycerol-3-Phosphate O-Acyltransferase 1	GeneCard	1.56817
1743	NTF3	Neurotrophin 3	GeneCard	1.56675
1744	ENPP1	Ectonucleotide Pyrophosphatase/Phosphodiesterase 1	GeneCard	1.56669
1745	DZANK1	Double Zinc Ribbon And Ankyrin Repeat Domains 1	GeneCard	1.56341
1746	COQ8A	Coenzyme Q8A	GeneCard	1.56031
1747	TSPAN8	Tetraspanin 8	GeneCard	1.56017
1748	TLR5	Toll Like Receptor 5	GeneCard	1.56012
1749	ARHGEF5	Rho Guanine Nucleotide Exchange Factor 5	GeneCard	1.55899
1750	ABCA1	ATP Binding Cassette Subfamily A Member 1	GeneCard	1.55823
1751	YIPF2	Yip1 Domain Family Member 2	GeneCard	1.55812
1752	SEPTIN9	Septin 9	GeneCard	1.55783
1753	TP73	Tumor Protein P73	GeneCard	1.55707
1754	RPS27	Ribosomal Protein S27	GeneCard	1.55647
1755	PROK1	Prokineticin 1	GeneCard	1.55576
1756	NAP1L1	Nucleosome Assembly Protein 1 Like 1	GeneCard	1.55367
1757	HIC1	HIC ZBTB Transcriptional Repressor 1	GeneCard	1.55227
1758	LORICRIN	Loricrin Cornified Envelope Precursor Protein	GeneCard	1.55209
1759	MIR206	MicroRNA 206	GeneCard	1.55184
1760	CCL22	C-C Motif Chemokine Ligand 22	GeneCard	1.55122
1761	COL6A3	Collagen Type VI Alpha 3 Chain	GeneCard	1.55038
1762	DMP1	Dentin Matrix Acidic Phosphoprotein 1	GeneCard	1.5478
1763	ARHGEF16	Rho Guanine Nucleotide Exchange Factor 16	GeneCard	1.54734
1764	MAP2	Microtubule Associated Protein 2	GeneCard	1.54464
1765	GNAZ	G Protein Subunit Alpha Z	GeneCard	1.54418
1766	E2F1	E2F Transcription Factor 1	GeneCard	1.54398
1767	SELENOP	Selenoprotein P	GeneCard	1.54368
1768	PTTG1	PTTG1 Regulator Of Sister Chromatid Separation, Securin	GeneCard	1.54185
1769	NR4A1	Nuclear Receptor Subfamily 4 Group A Member 1	GeneCard	1.54177
1770	SFXN1	Sideroflexin 1	GeneCard	1.54064
1771	CSPP1	Centrosome And Spindle Pole Associated Protein 1	GeneCard	1.54007
1772	QRICH1	Glutamine Rich 1	GeneCard	1.54007
1773	POMT1	Protein O-Mannosyltransferase 1	GeneCard	1.53516
1774	POMT2	Protein O-Mannosyltransferase 2	GeneCard	1.53516
1775	PLA2G7	Phospholipase A2 Group VII	GeneCard	1.53392
1776	CTSL	Cathepsin L	GeneCard	1.53272
1777	WDR37	WD Repeat Domain 37	GeneCard	1.53248
1778	CHTF18	Chromosome Transmission Fidelity Factor 18	GeneCard	1.53181
1779	KEAP1	Kelch Like ECH Associated Protein 1	GeneCard	1.53119
1780	GDF5	Growth Differentiation Factor 5	GeneCard	1.53075
1781	RAB8A	RAB8A, Member RAS Oncogene Family	GeneCard	1.53045
1782	FST	Follistatin	GeneCard	1.52952
1783	VRK2	VRK Serine/Threonine Kinase 2	GeneCard	1.52893
1784	VARS1	Valyl-TRNA Synthetase 1	GeneCard	1.52813
1785	VPS35	VPS35 Retromer Complex Component	GeneCard	1.52813
1786	ACAN	Aggrecan	GeneCard	1.52753
1787	BANF1	BAF Nuclear Assembly Factor 1	GeneCard	1.5274
1788	TWF1	Twinfilin Actin Binding Protein 1	GeneCard	1.52705
1789	CEP97	Centrosomal Protein 97	GeneCard	1.52564
1790	CEP170	Centrosomal Protein 170	GeneCard	1.5244
1791	MIR543	MicroRNA 543	GeneCard	1.52414
1792	SCUBE1	Signal Peptide, CUB Domain And EGF Like Domain Containing 1	GeneCard	1.5225
1793	PDP1	Pyruvate Dehydrogenase Phosphatase Catalytic Subunit 1	GeneCard	1.52172
1794	TRPC3	Transient Receptor Potential Cation Channel Subfamily C Member 3	GeneCard	1.5202
1795	GNRHR	Gonadotropin Releasing Hormone Receptor	GeneCard	1.51861
1796	WNT3	Wnt Family Member 3	GeneCard	1.51857
1797	CTNNBIP1	Catenin Beta Interacting Protein 1	GeneCard	1.51798
1798	GHRH	Growth Hormone Releasing Hormone	GeneCard	1.51771
1799	TMBIM4	Transmembrane BAX Inhibitor Motif Containing 4	GeneCard	1.51649
1800	PROX1	Prospero Homeobox 1	GeneCard	1.51549
1801	RARS1	Arginyl-TRNA Synthetase 1	GeneCard	1.5145
1802	PDS5A	PDS5 Cohesin Associated Factor A	GeneCard	1.51442
1803	NOG	Noggin	GeneCard	1.51387
1804	CETN2	Centrin 2	GeneCard	1.51221
1805	MTMR2	Myotubularin Related Protein 2	GeneCard	1.51044
1806	PTPN22	Protein Tyrosine Phosphatase Non-Receptor Type 22	GeneCard	1.50979
1807	NOSTRIN	Nitric Oxide Synthase Trafficking	GeneCard	1.50928
1808	LINC00309	Long Intergenic Non-Protein Coding RNA 309	GeneCard	1.50879
1809	ZEB2	Zinc Finger E-Box Binding Homeobox 2	GeneCard	1.50533
1810	TMEM199	Transmembrane Protein 199	GeneCard	1.50323
1811	PET117	PET117 Cytochrome C Oxidase Chaperone	GeneCard	1.50259
1812	ODC1	Ornithine Decarboxylase 1	GeneCard	1.50072
1813	GSTT1	Glutathione S-Transferase Theta 1	GeneCard	1.49941
1814	SLC4A7	Solute Carrier Family 4 Member 7	GeneCard	1.49924
1815	TUBA1C	Tubulin Alpha 1c	GeneCard	1.49892
1816	CCDC85B	Coiled-Coil Domain Containing 85B	GeneCard	1.49802
1817	COX5A	Cytochrome C Oxidase Subunit 5A	GeneCard	1.49657
1818	GTF3A	General Transcription Factor IIIA	GeneCard	1.49637
1819	XRCC1	X-Ray Repair Cross Complementing 1	GeneCard	1.4952
1820	FCGR2B	Fc Gamma Receptor IIb	GeneCard	1.49458
1821	IKBKG	Inhibitor Of Nuclear Factor Kappa B Kinase Regulatory Subunit Gamma	GeneCard	1.49404
1822	TUG1	Taurine Up-Regulated 1	GeneCard	1.49356
1823	MLH1	MutL Homolog 1	GeneCard	1.49186
1824	NUP205	Nucleoporin 205	GeneCard	1.48944
1825	BBS1	Bardet-Biedl Syndrome 1	GeneCard	1.48921
1826	DYRK1B	Dual Specificity Tyrosine Phosphorylation Regulated Kinase 1B	GeneCard	1.48891
1827	KIF1C	Kinesin Family Member 1C	GeneCard	1.48701
1828	DNAH8	Dynein Axonemal Heavy Chain 8	GeneCard	1.48547
1829	EXOSC8	Exosome Component 8	GeneCard	1.48536
1830	SLC25A5	Solute Carrier Family 25 Member 5	GeneCard	1.48527
1831	NOP2	NOP2 Nucleolar Protein	GeneCard	1.48293
1832	STK25	Serine/Threonine Kinase 25	GeneCard	1.48142
1833	MPDU1	Mannose-P-Dolichol Utilization Defect 1	GeneCard	1.48053
1834	CKAP4	Cytoskeleton Associated Protein 4	GeneCard	1.48013
1835	ADAMTS10	ADAM Metallopeptidase With Thrombospondin Type 1 Motif 10	GeneCard	1.47857
1836	MYO1C	Myosin IC	GeneCard	1.47829
1837	IL7R	Interleukin 7 Receptor	GeneCard	1.47653
1838	FASN	Fatty Acid Synthase	GeneCard	1.47611
1839	ANG	Angiogenin	GeneCard	1.47599
1840	INVS	Inversin	GeneCard	1.47569
1841	PSAP	Prosaposin	GeneCard	1.47469
1842	SMARCA5	SWI/SNF Related, Matrix Associated, Actin Dependent Regulator Of Chromatin, Subfamily A, Member 5	GeneCard	1.47339
1843	FKBP4	FKBP Prolyl Isomerase 4	GeneCard	1.47081
1844	ATP10A	ATPase Phospholipid Transporting 10A (Putative)	GeneCard	1.47033
1845	NOTCH2	Notch Receptor 2	GeneCard	1.46922
1846	TMEM87A	Transmembrane Protein 87A	GeneCard	1.46891
1847	TBCB	Tubulin Folding Cofactor B	GeneCard	1.46865
1848	NLRP2	NLR Family Pyrin Domain Containing 2	GeneCard	1.46534
1849	ARAP1	ArfGAP With RhoGAP Domain, Ankyrin Repeat And PH Domain 1	GeneCard	1.46505
1850	F11	Coagulation Factor XI	GeneCard	1.46454
1851	TLR7	Toll Like Receptor 7	GeneCard	1.4642
1852	CUL5	Cullin 5	GeneCard	1.46405
1853	LBP	Lipopolysaccharide Binding Protein	GeneCard	1.46253
1854	HNRNPD	Heterogeneous Nuclear Ribonucleoprotein D	GeneCard	1.45942
1855	RPS26	Ribosomal Protein S26	GeneCard	1.45921
1856	PRPF6	Pre-MRNA Processing Factor 6	GeneCard	1.45886
1857	AREG	Amphiregulin	GeneCard	1.45646
1858	LRAT	Lecithin Retinol Acyltransferase	GeneCard	1.45636
1859	PKD2	Polycystin 2, Transient Receptor Potential Cation Channel	GeneCard	1.45634
1860	LGI4	Leucine Rich Repeat LGI Family Member 4	GeneCard	1.45467
1861	ITPR1	Inositol 1,4,5-Trisphosphate Receptor Type 1	GeneCard	1.45432
1862	CD68	CD68 Molecule	GeneCard	1.45331
1863	NDEL1	NudE Neurodevelopment Protein 1 Like 1	GeneCard	1.45326
1864	SKIC8	SKI8 Subunit Of Superkiller Complex	GeneCard	1.45287
1865	RBX1	Ring-Box 1	GeneCard	1.45019
1866	CDKL5	Cyclin Dependent Kinase Like 5	GeneCard	1.44885
1867	MRAS	Muscle RAS Oncogene Homolog	GeneCard	1.44676
1868	FRS2	Fibroblast Growth Factor Receptor Substrate 2	GeneCard	1.44548
1869	HOXA13	Homeobox A13	GeneCard	1.44394
1870	HBE1	Hemoglobin Subunit Epsilon 1	GeneCard	1.44344
1871	SETD5	SET Domain Containing 5	GeneCard	1.44302
1872	EIF2B1	Eukaryotic Translation Initiation Factor 2B Subunit Alpha	GeneCard	1.44292
1873	EIF2B2	Eukaryotic Translation Initiation Factor 2B Subunit Beta	GeneCard	1.44292
1874	ORC5	Origin Recognition Complex Subunit 5	GeneCard	1.44167
1875	HTRA1	HtrA Serine Peptidase 1	GeneCard	1.43748
1876	RPL35A	Ribosomal Protein L35a	GeneCard	1.4366
1877	KHDRBS1	KH RNA Binding Domain Containing, Signal Transduction Associated 1	GeneCard	1.43466
1878	SYNE1	Spectrin Repeat Containing Nuclear Envelope Protein 1	GeneCard	1.4346
1879	LMX1B	LIM Homeobox Transcription Factor 1 Beta	GeneCard	1.43363
1880	RUVBL1	RuvB Like AAA ATPase 1	GeneCard	1.43112
1881	HDAC1	Histone Deacetylase 1	GeneCard	1.4302
1882	MAEA	Macrophage Erythroblast Attacher, E3 Ubiquitin Ligase	GeneCard	1.42993
1883	MTHFD1	Methylenetetrahydrofolate Dehydrogenase, Cyclohydrolase And Formyltetrahydrofolate Synthetase 1	GeneCard	1.42793
1884	SMPD3	Sphingomyelin Phosphodiesterase 3	GeneCard	1.4279
1885	LARGE1	LARGE Xylosyl- And Glucuronyltransferase 1	GeneCard	1.42767
1886	DEFB103A	Defensin Beta 103A	GeneCard	1.42752
1887	B4GALT7	Beta-1,4-Galactosyltransferase 7	GeneCard	1.42682
1888	ABCC9	ATP Binding Cassette Subfamily C Member 9	GeneCard	1.42459
1889	TYR	Tyrosinase	GeneCard	1.42283
1890	NKX2-1	NK2 Homeobox 1	GeneCard	1.42238
1891	SLITRK1	SLIT And NTRK Like Family Member 1	GeneCard	1.4198
1892	ETAA1	ETAA1 Activator Of ATR Kinase	GeneCard	1.41941
1893	DLX6	Distal-Less Homeobox 6	GeneCard	1.41844
1894	ARHGAP32	Rho GTPase Activating Protein 32	GeneCard	1.41735
1895	ENAM	Enamelin	GeneCard	1.41616
1896	TCTN1	Tectonic Family Member 1	GeneCard	1.41563
1897	MT-ND5	Mitochondrially Encoded NADH:Ubiquinone Oxidoreductase Core Subunit 5	GeneCard	1.41563
1898	TONSL-AS1	TONSL Antisense RNA 1	GeneCard	1.41563
1899	SLC26A5-AS1	SLC26A5 Antisense RNA 1	GeneCard	1.41563
1900	HOXA9	Homeobox A9	GeneCard	1.41344
1901	TRIP11	Thyroid Hormone Receptor Interactor 11	GeneCard	1.41069
1902	TGFBR3	Transforming Growth Factor Beta Receptor 3	GeneCard	1.40951
1903	RPL35	Ribosomal Protein L35	GeneCard	1.40906
1904	HGK	Mitogen-activated protein kinase kinase kinase kinase 4	OMIM	-
1905	NPH1	Nephrocystin-1	OMIM	-
1906	TM14	Transmembrane protein 14	OMIM	-
1907	RADMIS	Cytoskeleton-associated protein 2-like	OMIM	-
1908	CTRP10	Complement C1q-like protein 2	OMIM	-
1909	U4ATAC	RNA, U4ATAC small nuclear	OMIM	-
1910	CASPR5	Contactin-associated protein-like 5	OMIM	-
1911	GE	Glycophorin-C	OMIM	-
1912	PINCH2	LIM and senescent cell antigen-like-containing domain protein 2	OMIM	-
1913	NSMASE3	Sphingomyelin phosphodiesterase 4, neutral membrane	OMIM	-
1914	ASEF	RHO guanine nucleotide exchange factor 4	OMIM	-
1915	D2S201E	Chemokine (C-X-C motif) receptor 4 (neuropeptide Y receptor Y3)	OMIM	-
1916	ZFHX1B	Zinc finger E box-binding homeobox 2	OMIM	-
1917	ORC4L	Origin recognition complex, subunit 4	OMIM	-
1918	NKHC2	Kinesin family member 5C	OMIM	-
1919	RHOE	Rho-related GTP-binding protein RhoE	OMIM	-
1920	NEM2	Nebulin	OMIM	-
1921	PSCDBP	Cytohesin-interacting protein	OMIM	-
1922	DCL1	CD302 antigen	OMIM	-
1923	AI1H	Amelogenesis imperfecta, type IH	OMIM	-
1924	MDA5	Interferon induced with helicase C domain 1	OMIM	-
1925	GEFSP2	Generalized epilepsy with febrile seizures plus, type 2	OMIM	-
1926	JEB6	Epidermolysis bullosa, junctional 6, with pyloric atresia	OMIM	-
1927	ZAK	Mitogen-activated protein kinase kinase kinase 20	OMIM	-
1928	JPO1	Cell division cycle-associated protein 7	OMIM	-
1929	ACHRD	Acetylcholine receptor subunit delta	OMIM	-
1930	HOX4I	Homeobox protein Hox-D13	OMIM	-
1931	HOX4A	Homeobox protein Hox-D3	OMIM	-
1932	CAMDI	Coiled-coil domain-containing protein 141	OMIM	-
1933	CD49D	Integrin, alpha-4 (antigen CD49D, alpha-4 subunit of VLA-4 receptor)	OMIM	-
1934	VNRA	Integrin alpha-V	OMIM	-
1935	EDSVASC	Collagen III	OMIM	-
1936	CANDF7	Signal transducer and activator of transcription 1-alpha/beta	OMIM	-
1937	MC1DN25	NADH dehydrogenase [ubiquinone] 1 beta subcomplex subunit 3	OMIM	-
1938	MCH5	Caspase-8	OMIM	-
1939	MDC3	Disintegrin and metalloproteinase domain-containing protein 23	OMIM	-
1940	C2orf21	Protein unc-80 homolog	OMIM	-
1941	ARCI4A	ATP-binding cassette sub-family A member 12	OMIM	-
1942	FN	Fibronectin	OMIM	-
1943	HARP	SWI/SNF-related matrix-associated actin-dependent regulator of chromatin subfamily A-like protein 1	OMIM	-
1944	TNS	Tensin-1	OMIM	-
1945	IL8RB	C-X-C chemokine receptor type 2	OMIM	-
1946	IL8RA	C-X-C chemokine receptor type 1	OMIM	-
1947	NRAMP	Natural resistance-associated macrophage protein 2	OMIM	-
1948	FLNMS	Mitochondrial chaperone BCS1	OMIM	-
1949	WS1	Paired box protein Pax-3	OMIM	-
1950	FARSLB	phenylalanyl-tRNA synthetase subunit beta	OMIM	-
1951	KIAA1486	Neuronal tyrosine-phosphorylated phosphoinositide-3-kinase adapter 2	OMIM	-
1952	ATS2	Collagen alpha-3(IV) chain	OMIM	-
1953	SLI5	Transmembrane 4 L6 family member 20	OMIM	-
1954	JBTS22	Retinal rod rhodopsin-sensitive cGMP 3',5'-cyclic phosphodiesterase subunit delta	OMIM	-
1955	ACHRG	Acetylcholine receptor subunit gamma	OMIM	-
1956	CXCR7	Atypical chemokine receptor 3	OMIM	-
1957	DYT27	Collagen alpha-3(VI) chain	OMIM	-
1958	MC1DN22	NADH dehydrogenase [ubiquinone] 1 alpha subcomplex subunit 10, mitochondrial	OMIM	-
1959	SLEB2	Programmed cell death protein 1	OMIM	-
1960	C3DELpterp25	3p- syndrome (chromosome 3pter-p25 deletion syndrome)	OMIM	-
1961	CALL	Neural cell adhesion molecule L1-like protein	OMIM	-
1962	NB3	Contactin 6	OMIM	-
1963	BR140	Peregrin	OMIM	-
1964	SCN6	Sodium channel protein type 7 subunit alpha	OMIM	-
1965	AVSD2	Cysteine-rich protein with EGF-like domains 1	OMIM	-
1966	KIAA0121	Vestigial-like family member 4	OMIM	-
1967	PPARG1	Peroxisome proliferator activated receptor, gamma	OMIM	-
1968	KIAA0763	IQ motif- and Sec7 domain-containing protein 1	OMIM	-
1969	COXPD50	Mitochondrial ribosomal protein S25	OMIM	-
1970	ERBA2	Thyroid hormone receptor beta	OMIM	-
1971	SIMP	Dolichyl-diphosphooligosaccharide--protein glycosyltransferase subunit STT3B	OMIM	-
1972	CKR4	Chemokine (C-C) receptor-4	OMIM	-
1973	MYD88D	MYD88 innate immune signal transduction adaptor	OMIM	-
1974	LQT3	Sodium channel, voltage-gated, type V, alpha polypeptide	OMIM	-
1975	GPR13	CX3C chemokine receptor 1	OMIM	-
1976	LAMR1	40S ribosomal protein SA	OMIM	-
1977	NEDSDV	Catenin beta-1	OMIM	-
1978	DHHC3	Zinc finger DHHC domain-containing protein 3	OMIM	-
1979	SIMA135	CUB domain-containing protein 1	OMIM	-
1980	PRLTS4	Leucyl-tRNA synthetase, mitochondrial	OMIM	-
1981	KIAA1471	Tyrosine-protein phosphatase non-receptor type 23	OMIM	-
1982	SEP	Plexin B1	OMIM	-
1983	AGS1	Dexamethasone-induced Ras-related protein 1	OMIM	-
1984	NDNC8	Collagen VII, alpha-1 polypeptide	OMIM	-
1985	EGFL1	Cadherin EGF LAG seven-pass G-type receptor 3	OMIM	-
1986	AF3P21	NCK-interacting protein with SH3 domain	OMIM	-
1987	VERBRAS	Glutamine-rich protein 1	OMIM	-
1988	LAMS	Laminin subunit beta-2	OMIM	-
1989	NIK	Mitogen-activated protein kinase kinase kinase kinase 4	OMIM	-
1990	SLSN1	Nephrocystin	OMIM	-
1991	C1QTNF10	Complement component 1, q subcomponent-like 2	OMIM	-
1992	MOPD1	RNA, U4ATAC small nuclear	OMIM	-
1993	GPC	Glycophorin C	OMIM	-
1994	MDRCMTT	LIM zinc finger domain-containing protein 2	OMIM	-
1995	KIAA1418	Sphingomyelin phosphodiesterase 4	OMIM	-
1996	NPY3R	Chemokine (C-X-C motif) receptor 4 (neuropeptide Y receptor Y3)	OMIM	-
1997	SMADIP1	Chemokine (C-X-C motif) receptor 4 (neuropeptide Y receptor Y3)	OMIM	-
1998	CDCBM2	Kinesin family member 5C	OMIM	-
[truncated: 3,836 more rows]
