# Supplementary material for: Mechanism of Smilax china L. in the treatment of intrauterine adhesions based on network pharmacology, molecular docking and experimental validation
Source: BMC Complement Med Ther. 2024 Apr 5;24:150. doi: 10.1186/s12906-024-04414-4 (PMC10996135; doi:10.1186/s12906-024-04414-4)
Supplement: Supplementary file 4 — Supplementary Material 4 [file 12906_2024_4414_MOESM4_ESM.xlsx]

## Sheet: Sheet1
Supplementary Table 4 Information of 93 common targets
NO.	Targets	Gene symbol	Protein name
1	ABCB1	ABCB1	ATP Binding Cassette Subfamily B Member 1
2	ACHE	ACHE	Acetylcholinesterase (Cartwright Blood Group)
3	ADAM17	ADAM17	ADAM Metallopeptidase Domain 17
4	ADRB2	ADRB2	Adrenoceptor Beta 2
5	AKR1B1	AKR1B1	Aldo-Keto Reductase Family 1 Member B
6	AKT1	AKT1	AKT Serine/Threonine Kinase 1
7	APOB	APOB	Apolipoprotein B
8	AR	AR	Androgen Receptor
9	AURKB	AURKB	Aurora Kinase B
10	AXL	AXL	AXL Receptor Tyrosine Kinase
11	BAX	BAX	BCL2 Associated X, Apoptosis Regulator
12	BCL2L1	BCL2L1	BCL2 Like 1
13	CALM1	CALM1	Calmodulin 1
14	CASP3	CASP3	Caspase 3
15	CASP8	CASP8	Caspase 8
16	CASP9	CASP9	Caspase 9
17	CAT	CAT	Catalase
18	CDK1	CDK1	Cyclin Dependent Kinase 1
19	CDK2	CDK2	Cyclin Dependent Kinase 2
20	CDK5	CDK5	Cyclin Dependent Kinase 5
21	CDK6	CDK6	Cyclin Dependent Kinase 6
22	CDKN1A	CDKN1A	Cyclin Dependent Kinase Inhibitor 1A
23	CHEK1	CHEK1	Checkpoint Kinase 1
24	CHRNA7	CHRNA7	Cholinergic Receptor Nicotinic Alpha 7 Subunit
25	CSNK2A1	CSNK2A1	Casein Kinase 2 Alpha 1
26	CYP19A1	CYP19A1	Cytochrome P450 Family 19 Subfamily A Member 1
27	CYP1B1	CYP1B1	Cytochrome P450 Family 1 Subfamily B Member 1
28	DNMT1	DNMT1	DNA Methyltransferase 1
29	DPP4	DPP4	Dipeptidyl Peptidase 4
30	DYRK1A	DYRK1A	Dual Specificity Tyrosine Phosphorylation Regulated Kinase 1A
31	EGFR	EGFR	Epidermal Growth Factor Receptor
32	ESR1	ESR1	Estrogen Receptor 1
33	ESR2	ESR2	Estrogen Receptor 2
34	F2	F2	Coagulation Factor II, Thrombin
35	FASN	FASN	Fatty Acid Synthase
36	FLT3	FLT3	Fms Related Receptor Tyrosine Kinase 3
37	FOS	FOS	Fos Proto-Oncogene, AP-1 Transcription Factor Subunit
38	FUT4	FUT4	Fucosyltransferase 4
39	FUT7	FUT7	Alpha-(1,3)-fucosyltransferase 7				1
40	GSK3B	GSK3B	Glycogen Synthase Kinase 3 Beta
41	HIF1A	HIF1A	Hypoxia Inducible Factor 1 Subunit Alpha
42	HRAS	HRAS	HRas Proto-Oncogene, GTPase
43	HSP90AB1	HSP90AB1	Heat Shock Protein 90 Alpha Family Class B Member 1
44	ICAM1	ICAM1	Intercellular Adhesion Molecule 1
45	IFNG	IFNG	Interferon Gamma
46	IGF1R	IGF1R	Insulin Like Growth Factor 1 Receptor
47	IL10	IL10	Interleukin 10
48	KCNH2	KCNH2	Potassium Voltage-Gated Channel Subfamily H Member 2
49	KDR	KDR	Kinase Insert Domain Receptor
50	KIT	KIT	v-kit Hardy-Zuckerman 4 feline sarcoma viral oncogene
51	MAP2	MAP2	Microtubule Associated Protein 2
52	MAPK14	MAPK14	Mitogen-Activated Protein Kinase 14
53	MET	MET	MET Proto-Oncogene, Receptor Tyrosine Kinase
54	MMP12	MMP12	Matrix Metallopeptidase 12
55	MMP2	MMP2	Matrix Metallopeptidase 2
56	MMP3	MMP3	Matrix Metallopeptidase 3
57	MMP7	MMP7	Matrix Metallopeptidase 7
58	MMP8	MMP8	Matrix Metallopeptidase 8
59	MMP9	MMP9	Matrix Metallopeptidase 9
60	MPO	MPO	Myeloperoxidase
61	MTOR	MTOR	Mechanistic Target Of Rapamycin Kinase
62	NCOA2	NCOA2	Nuclear Receptor Coactivator 2
63	NOS2	NOS2	Nitric Oxide Synthase 2
64	NR3C1	NR3C1	Nuclear Receptor Subfamily 3 Group C Member 1
65	NR3C2	NR3C2	Nuclear Receptor Subfamily 3 Group C Member 2
66	PIK3CG	PIK3CG	Phosphatidylinositol-4,5-Bisphosphate 3-Kinase Catalytic Subunit Gamma
67	PIK3R1	PIK3R1	Phosphoinositide-3-Kinase Regulatory Subunit 1
68	PKN1	PKN1	Serine/threonine-protein kinase N1
69	PLK1	PLK1	Polo Like Kinase 1
70	PON1	PON1	Paraoxonase 1
71	PPARG	PPARG	Peroxisome Proliferator Activated Receptor Gamma
72	PRKACA	PRKACA	Protein Kinase CAMP-Activated Catalytic Subunit Alpha
73	PRKCA	PRKCA	Protein Kinase C Alpha
74	PTGS1	PTGS1	Prostaglandin-Endoperoxide Synthase 1
75	PTGS2	PTGS2	Prostaglandin-Endoperoxide Synthase 2
76	PTK2	PTK2	Protein-tyrosine kinase 2
77	PTPN1	PTPN1	Protein Tyrosine Phosphatase Non-Receptor Type 1
78	PTPRS	PTPRS	Receptor-type tyrosine-protein phosphatase S
79	RELA	RELA	RELA Proto-Oncogene, NF-KB Subunit
80	RXRA	RXRA	Retinoid X Receptor Alpha
81	SCN5A	SCN5A	Sodium Voltage-Gated Channel Alpha Subunit 5
82	SLC6A4	SLC6A4	Solute Carrier Family 6 Member 4
83	SOD1	SOD1	Superoxide Dismutase 1
84	SRC	SRC	SRC Proto-Oncogene, Non-Receptor Tyrosine Kinase
85	STAT1	STAT1	Signal Transducer And Activator Of Transcription 1
86	TERT	TERT	Telomerase Reverse Transcriptase
87	TGFB1	TGFB1	Transforming Growth Factor Beta 1
88	TNFRSF1A	TNFRSF1A	TNF Receptor Superfamily Member 1A
89	TOP1	TOP1	DNA Topoisomerase I
90	TP53	TP53	Tumor Protein P53
91	TYR	TYR	Tyrosinase
92	VEGFA	VEGFA	Vascular Endothelial Growth Factor A
93	XDH	XDH	Xanthine Dehydrogenase
