# Supplementary material for: Mechanism of Smilax china L. in the treatment of intrauterine adhesions based on network pharmacology, molecular docking and experimental validation
Source: BMC Complement Med Ther. 2024 Apr 5;24:150. doi: 10.1186/s12906-024-04414-4 (PMC10996135; doi:10.1186/s12906-024-04414-4)
Supplement: Supplementary file 5 — Supplementary Material 5 [file 12906_2024_4414_MOESM5_ESM.xlsx]

## Sheet: Sheet1
Supplementary Table 5 Result of the biological process category terms from GO analysis
Category	Term	Count	%	PValue	Genes	List Total	Pop Hits	Pop Total	Fold Enrichment	Bonferroni	Benjamini	FDR
GOTERM_BP_DIRECT	GO:0042493~response to drug	22	21.3592	3.16486e-18	IL10, BCHE, CDKN1A, TGFB1, ABCB1, HSP90AB1, STAT1, SRC, FOS, PTGS2, RELA, SLC6A4, ICAM1, SOD1, ADAM17, CASP3, CAT, PDE3A, CDK1, PPARG, TOP1, TP53	103	293	19308	14.0752	7.23487e-15	7.23487e-15	6.45948e-15
GOTERM_BP_DIRECT	GO:0043066~negative regulation of apoptotic process	25	24.2718	2.89538e-16	GSK3B, CDKN1A, SRC, AKR1B1, PIK3R1, MPO, RELA, EGFR, IGF1R, CASP3, KDR, AKT1, MCL1, IL10, PLK1, MMP9, MTOR, PTK2, VEGFA, AXL, CAT, PDE3A, CDK1, TP53, BCL2L1	103	526	19308	8.90952	7.61391e-13	3.30942e-13	2.95473e-13
GOTERM_BP_DIRECT	GO:0018105~peptidyl-serine phosphorylation	16	15.534	3.61719e-14	GSK3B, CSNK2A1, SRC, PLK1, DYRK1A, PRKCA, MAPK14, MTOR, CDK5, CDK2, CDK1, BAX, AKT1, TOP1, PKN1, PRKACA	103	181	19308	16.5707	8.27378e-11	2.2305e-11	1.99145e-11
GOTERM_BP_DIRECT	GO:0010629~negative regulation of gene expression	19	18.4466	3.90289e-14	GSK3B, CDKN1A, DNMT1, TGFB1, ABCC2, NOS2, MMP8, HIF1A, ESR1, VEGFA, IFNG, TERT, KDR, CDK1, AKT1, PPARG, MAPT, HRAS, XDH	103	309	19308	11.5264	8.93365e-11	2.2305e-11	1.99145e-11
GOTERM_BP_DIRECT	GO:0009410~response to xenobiotic stimulus	16	15.534	2.25257e-12	IL10, ABCB1, HSP90AB1, STAT1, SRC, MMP2, FOS, PTGS2, SLC6A4, SOD1, ADAM17, CASP3, CAT, PDE3A, CDK1, TOP1	103	240	19308	12.4971	5.14929e-09	1.02988e-09	9.195e-10
GOTERM_BP_DIRECT	GO:0008284~positive regulation of cell proliferation	21	20.3883	8.33611e-12	TGFB1, CSNK2A1, PLA2G1B, FLT3, CHRNA7, F2, EGFR, RELA, PTK2, IGF1R, VEGFA, DPP4, AR, ADAM17, IFNG, KIT, CDK2, KDR, AKT1, HRAS, BCL2L1	103	550	19308	7.15742	1.90563e-08	3.17606e-09	2.83567e-09
GOTERM_BP_DIRECT	GO:0046777~protein autophosphorylation	14	13.5922	1.26613e-11	GSK3B, FLT3, SRC, DYRK1A, EGFR, MTOR, PTK2, AURKB, IGF1R, CDK5, KIT, KDR, AKT1, PRKACA	103	181	19308	14.4994	2.89438e-08	4.13483e-09	3.69168e-09
GOTERM_BP_DIRECT	GO:0032355~response to estradiol	12	11.6505	1.73728e-11	CASP9, TGFB1, CASP8, ABCC2, CASP3, CAT, CYP1B1, APOB, PTGS2, ESR1, CYP19A1, SLC6A4	103	112	19308	20.0846	3.97142e-08	4.96427e-09	4.43223e-09
GOTERM_BP_DIRECT	GO:0007568~aging	14	13.5922	3.03998e-11	IL10, TGFB1, MMP7, MMP2, FOS, PTGS2, MPO, RELA, AURKB, SOD1, IGF1R, CASP9, CAT, AKT1	103	194	19308	13.5278	6.94939e-08	7.72155e-09	6.894e-09
GOTERM_BP_DIRECT	GO:0001934~positive regulation of protein phosphorylation	14	13.5922	8.20751e-11	CDKN1A, TGFB1, CHRNA7, F2, MMP9, EGFR, PTK2, AURKB, VEGFA, ADAM17, IFNG, KDR, AKT1, HRAS	103	210	19308	12.4971	1.87624e-07	1.87624e-08	1.67515e-08
GOTERM_BP_DIRECT	GO:0018107~peptidyl-threonine phosphorylation	10	9.70874	1.27003e-10	GSK3B, CSNK2A1, CDK5, CHEK1, DYRK1A, CDK1, AKT1, PRKCA, PRKACA, MTOR	103	71	19308	26.4023	2.90328e-07	2.42215e-08	2.16256e-08
GOTERM_BP_DIRECT	GO:0006468~protein phosphorylation	19	18.4466	1.27147e-10	GSK3B, TGFB1, CSNK2A1, PLK1, DYRK1A, PRKCA, PIK3R1, MTOR, PIK3CG, PTK2, AURKB, CDK6, CDK5, CHEK1, CDK2, CDK1, AKT1, PKN1, PRKACA	103	501	19308	7.10912	2.90658e-07	2.42215e-08	2.16256e-08
GOTERM_BP_DIRECT	GO:1902895~positive regulation of pri-miRNA transcription from RNA polymerase II promoter	9	8.73786	1.45434e-10	IL10, TGFB1, TERT, PPARG, FOS, NR3C1, HIF1A, TP53, RELA	103	48	19308	35.1481	3.32462e-07	2.5574e-08	2.28331e-08
GOTERM_BP_DIRECT	GO:0010628~positive regulation of gene expression	19	18.4466	2.04857e-10	GSK3B, DNMT1, TGFB1, NR1I2, MAPK14, MMP8, HIF1A, MTOR, RELA, SLC6A4, VEGFA, AR, CDK6, IFNG, CDK1, AKT1, PPARG, APOB, TP53	103	516	19308	6.90246	4.68303e-07	3.34502e-08	2.98652e-08
GOTERM_BP_DIRECT	GO:0007165~signal transduction	28	27.1845	2.60848e-10	GSK3B, PLA2G1B, SRC, CHRNA7, NR1I2, PIK3R1, NR3C1, HIF1A, EGFR, NR3C2, IGF1R, AKT1, HRAS, IL10, CSNK2A1, STAT1, MAPK14, ESR1, ESR2, TNFRSF1A, AR, AXL, KIT, CDK2, PDE3A, PPARG, PKN1, MET	103	1267	19308	4.14268	5.96297e-07	3.97532e-08	3.54927e-08
GOTERM_BP_DIRECT	GO:0030335~positive regulation of cell migration	14	13.5922	1.04132e-09	TGFB1, MMP7, MMP2, PRKCA, PIK3R1, MMP9, EGFR, PTK2, IGF1R, VEGFA, ADAM17, KIT, KDR, HRAS	103	258	19308	10.172	2.38046e-06	1.48779e-07	1.32834e-07
GOTERM_BP_DIRECT	GO:0051897~positive regulation of protein kinase B signaling	11	10.6796	1.5775e-09	TGFB1, HSP90AB1, SRC, AXL, MET, PTK2, EGFR, MTOR, PIK3CG, IGF1R, VEGFA	103	129	19308	15.9846	3.60616e-06	2.12128e-07	1.89393e-07
GOTERM_BP_DIRECT	GO:0043065~positive regulation of apoptotic process	15	14.5631	1.95727e-09	TGFB1, SRC, MMP2, PTGS2, MMP9, SOD1, CASP9, CASP8, CASP3, BAX, CYP1B1, AKT1, PPARG, TP53, MCL1	103	328	19308	8.5727	4.47431e-06	2.48573e-07	2.21933e-07
GOTERM_BP_DIRECT	GO:0045944~positive regulation of transcription from RNA polymerase II promoter	26	25.2427	2.39093e-09	PLA2G1B, NR1I2, ADRB2, PIK3R1, NR3C1, HIF1A, RELA, EGFR, RXRA, AKT1, HRAS, IL10, NCOA2, TGFB1, STAT1, FOS, MAPK14, ESR1, ESR2, TNFRSF1A, VEGFA, MMP12, AR, PPARG, MET, TP53	103	1204	19308	4.04806	5.46565e-06	2.87667e-07	2.56836e-07
GOTERM_BP_DIRECT	GO:0001541~ovarian follicle development	8	7.76699	3.04259e-09	MMP2, KIT, KDR, BAX, BCL2L1, ICAM1, SOD1, VEGFA	103	44	19308	34.083	6.95534e-06	3.47768e-07	3.10497e-07
GOTERM_BP_DIRECT	GO:0048661~positive regulation of smooth muscle cell proliferation	9	8.73786	3.30731e-09	TGFB1, STAT1, MMP2, AKR1B1, AKT1, PTGS2, EGFR, MTOR, IGF1R	103	70	19308	24.1015	7.56049e-06	3.60025e-07	3.21439e-07
GOTERM_BP_DIRECT	GO:0071456~cellular response to hypoxia	11	10.6796	4.31079e-09	TERT, SRC, AKT1, PPARG, FOS, PTGS2, HIF1A, TP53, MTOR, ICAM1, VEGFA	103	143	19308	14.4197	9.85442e-06	4.29307e-07	3.83297e-07
GOTERM_BP_DIRECT	GO:0006954~inflammatory response	16	15.534	4.31937e-09	TGFB1, ABCC2, NOS2, FOS, PTGS2, MTOR, PIK3CG, RELA, FUT4, PTGS1, TNFRSF1A, FUT7, AXL, FASN, KIT, AKT1	103	412	19308	7.27986	9.87402e-06	4.29307e-07	3.83297e-07
GOTERM_BP_DIRECT	GO:0051402~neuron apoptotic process	9	8.73786	5.18932e-09	CASP9, CDK5, AXL, CASP3, BAX, HRAS, HIF1A, TP53, BCL2L1	103	74	19308	22.7987	1.18627e-05	4.94282e-07	4.41308e-07
GOTERM_BP_DIRECT	GO:0045429~positive regulation of nitric oxide biosynthetic process	8	7.76699	6.6749e-09	HSP90AB1, IFNG, AKT1, MMP8, PTGS2, ESR1, MTOR, ICAM1	103	49	19308	30.6051	1.52587e-05	6.10352e-07	5.44939e-07
GOTERM_BP_DIRECT	GO:0045893~positive regulation of transcription, DNA-templated	20	19.4175	7.02495e-09	IL10, KCNH2, TGFB1, STAT1, SRC, NR1I2, DYRK1A, FOS, HIF1A, ESR1, EGFR, RELA, ESR2, AR, RXRA, CDK2, AKT1, PPARG, PKN1, TP53	103	725	19308	5.17121	1.60589e-05	6.17655e-07	5.51458e-07
GOTERM_BP_DIRECT	GO:0043406~positive regulation of MAP kinase activity	9	8.73786	9.7245e-09	TGFB1, FLT3, PLA2G1B, SRC, KIT, HRAS, EGFR, PIK3CG, VEGFA	103	80	19308	21.0888	2.223e-05	8.23341e-07	7.351e-07
GOTERM_BP_DIRECT	GO:0043410~positive regulation of MAPK cascade	11	10.6796	1.27482e-08	AR, FLT3, CHRNA7, KIT, KDR, ADRB2, MMP8, HRAS, SOD1, IGF1R, VEGFA	103	160	19308	12.8876	2.91419e-05	1.02957e-06	9.19231e-07
GOTERM_BP_DIRECT	GO:0014068~positive regulation of phosphatidylinositol 3-kinase signaling	9	8.73786	1.30611e-08	FLT3, SRC, KIT, CAT, KDR, F2, PTK2, IGF1R, VEGFA	103	83	19308	20.3266	2.98572e-05	1.02957e-06	9.19231e-07
GOTERM_BP_DIRECT	GO:0071260~cellular response to mechanical stimulus	9	8.73786	1.90168e-08	TGFB1, CASP8, MMP7, CHEK1, AKT1, PTGS2, EGFR, IGF1R, TNFRSF1A	103	87	19308	19.392	4.34715e-05	1.44908e-06	1.29378e-06
GOTERM_BP_DIRECT	GO:0071549~cellular response to dexamethasone stimulus	7	6.79612	3.81393e-08	CASP9, TGFB1, ABCC2, NR3C1, EGFR, ICAM1, IGF1R	103	37	19308	35.4647	8.71826e-05	2.81247e-06	2.51104e-06
GOTERM_BP_DIRECT	GO:0001666~response to hypoxia	11	10.6796	4.35252e-08	DPP4, ADAM17, TGFB1, NOS2, CHRNA7, CASP3, MMP2, CAT, HIF1A, SLC6A4, VEGFA	103	182	19308	11.3298	9.94937e-05	3.10933e-06	2.77609e-06
GOTERM_BP_DIRECT	GO:0042307~positive regulation of protein import into nucleus	7	6.79612	1.12401e-07	TGFB1, HSP90AB1, IFNG, CDK1, PIK3R1, MAPK14, PTGS2	103	44	19308	29.8226	0.000256915	7.7863e-06	6.95181e-06
GOTERM_BP_DIRECT	GO:0043524~negative regulation of neuron apoptotic process	10	9.70874	1.56654e-07	IL10, HSP90AB1, TERT, AXL, KDR, BAX, HRAS, HIF1A, BCL2L1, SOD1	103	158	19308	11.8643	0.000358046	1.05327e-05	9.40383e-06
GOTERM_BP_DIRECT	GO:0030518~intracellular steroid hormone receptor signaling pathway	5	4.85437	2.35445e-07	AR, NR3C1, ESR1, ESR2, NR3C2	103	11	19308	85.2074	0.000538082	1.53779e-05	1.37298e-05
GOTERM_BP_DIRECT	GO:0043536~positive regulation of blood vessel endothelial cell migration	7	6.79612	2.46634e-07	ADAM17, TGFB1, KDR, AKT1, PRKCA, HIF1A, VEGFA	103	50	19308	26.2439	0.000563648	1.56613e-05	1.39828e-05
GOTERM_BP_DIRECT	GO:0071407~cellular response to organic cyclic compound	7	6.79612	4.4045e-07	TGFB1, CASP8, HSP90AB1, STAT1, CDK1, CYP1B1, AKT1	103	55	19308	23.8581	0.00100636	2.72127e-05	2.42962e-05
GOTERM_BP_DIRECT	GO:0048010~vascular endothelial growth factor receptor signaling pathway	6	5.82524	4.78228e-07	SRC, AXL, KDR, MAPK14, PTK2, VEGFA	103	30	19308	37.4913	0.00109263	2.87692e-05	2.56859e-05
GOTERM_BP_DIRECT	GO:0007169~transmembrane receptor protein tyrosine kinase signaling pathway	9	8.73786	5.22375e-07	FLT3, SRC, AXL, KIT, KDR, MET, PTK2, EGFR, IGF1R	103	133	19308	12.685	0.00119344	3.06192e-05	2.73376e-05
GOTERM_BP_DIRECT	GO:0048146~positive regulation of fibroblast proliferation	7	6.79612	5.4666e-07	CDKN1A, TGFB1, CDK6, PLA2G1B, HRAS, ESR1, EGFR	103	57	19308	23.021	0.00124888	3.12416e-05	2.78933e-05
GOTERM_BP_DIRECT	GO:0042981~regulation of apoptotic process	11	10.6796	5.71906e-07	CASP9, CASP8, CDK5, FLT3, STAT1, BAX, AKT1, ESR1, TP53, BCL2L1, MCL1	103	240	19308	8.59175	0.00130652	3.18872e-05	2.84698e-05
GOTERM_BP_DIRECT	GO:0000122~negative regulation of transcription from RNA polymerase II promoter	20	19.4175	6.58975e-07	NCOA2, DNMT1, TGFB1, STAT1, PLK1, NR1I2, NR3C1, ESR1, RELA, ESR2, AURKB, VEGFA, MMP12, AR, RXRA, CDK6, IFNG, CDK2, PPARG, TP53	103	969	19308	3.86907	0.00150528	3.58671e-05	3.20231e-05
GOTERM_BP_DIRECT	GO:0006915~apoptotic process	16	15.534	6.79156e-07	CSNK2A1, MAPK14, NR3C1, MMP9, SOD1, TNFRSF1A, CASP9, CASP8, IFNG, CASP3, CHEK1, CDK1, BAX, TP53, MCL1, BCL2L1	103	607	19308	4.94119	0.00155135	3.61058e-05	3.22362e-05
GOTERM_BP_DIRECT	GO:0000086~G2/M transition of mitotic cell cycle	7	6.79612	7.44599e-07	CDKN1A, ABCB1, PLK1, CHEK1, CDK2, CDK1, CALM1	103	60	19308	21.8699	0.00170071	3.86853e-05	3.45393e-05
GOTERM_BP_DIRECT	GO:1900182~positive regulation of protein localization to nucleus	6	5.82524	7.86518e-07	TGFB1, SRC, PLK1, CDK1, AKT1, F2	103	33	19308	34.083	0.00179637	3.99551e-05	3.5673e-05
GOTERM_BP_DIRECT	GO:0001525~angiogenesis	11	10.6796	8.9232e-07	CASP8, MMP2, KDR, CYP1B1, PRKCA, MAPK14, PTGS2, HIF1A, PTK2, PIK3CG, VEGFA	103	252	19308	8.18262	0.00203777	4.41221e-05	3.93933e-05
GOTERM_BP_DIRECT	GO:0018108~peptidyl-tyrosine phosphorylation	9	8.73786	9.07146e-07	FLT3, SRC, AXL, KIT, DYRK1A, KDR, MET, PTK2, EGFR	103	143	19308	11.7979	0.00207159	4.41221e-05	3.93933e-05
GOTERM_BP_DIRECT	GO:1904645~response to beta-amyloid	5	4.85437	9.58178e-07	MMP12, CHRNA7, MMP2, MMP3, MMP9	103	15	19308	62.4854	0.002188	4.56332e-05	4.07425e-05
GOTERM_BP_DIRECT	GO:2000379~positive regulation of reactive oxygen species metabolic process	6	5.82524	1.06684e-06	CDKN1A, CYP1B1, F2, MAPK14, TP53, XDH	103	35	19308	32.1354	0.00243583	4.97714e-05	4.44372e-05
GOTERM_BP_DIRECT	GO:0051726~regulation of cell cycle	12	11.6505	1.14842e-06	CDKN1A, TGFB1, CDK6, HSP90AB1, CSNK2A1, IFNG, CDK5, PLK1, BAX, PRKACA, HRAS, TP53	103	324	19308	6.94283	0.00262185	5.25059e-05	4.68786e-05
GOTERM_BP_DIRECT	GO:0034614~cellular response to reactive oxygen species	6	5.82524	1.62895e-06	MMP2, AKT1, FOS, MAPT, MMP9, EGFR	103	38	19308	29.5984	0.00371686	7.30153e-05	6.51899e-05
GOTERM_BP_DIRECT	GO:0032496~response to lipopolysaccharide	9	8.73786	1.83525e-06	CASP9, ADAM17, CASP8, NOS2, CASP3, FOS, APOB, PTGS2, MPO	103	157	19308	10.7459	0.00418659	8.06803e-05	7.20334e-05
GOTERM_BP_DIRECT	GO:0033674~positive regulation of kinase activity	7	6.79612	2.39543e-06	FLT3, AXL, KIT, KDR, MET, EGFR, IGF1R	103	73	19308	17.9753	0.00546099	0.000101671	9.07743e-05
GOTERM_BP_DIRECT	GO:0030574~collagen catabolic process	6	5.82524	2.40167e-06	MMP12, MMP7, MMP2, MMP3, MMP8, MMP9	103	41	19308	27.4326	0.00547518	0.000101671	9.07743e-05
GOTERM_BP_DIRECT	GO:0071392~cellular response to estradiol stimulus	6	5.82524	2.71484e-06	IL10, MMP2, ESR1, ESR2, EGFR, IGF1R	103	42	19308	26.7795	0.00618691	0.000112839	0.000100745
GOTERM_BP_DIRECT	GO:1901216~positive regulation of neuron death	6	5.82524	3.05923e-06	GSK3B, CASP8, IFNG, FOS, MAPT, MTOR	103	43	19308	26.1567	0.006969	0.000124882	0.000111498
GOTERM_BP_DIRECT	GO:0048511~rhythmic process	7	6.79612	3.27996e-06	GSK3B, CSNK2A1, CDK5, CDK1, PPARG, TP53, MTOR	103	77	19308	17.0415	0.00746996	0.000129276	0.000115421
GOTERM_BP_DIRECT	GO:0001938~positive regulation of endothelial cell proliferation	7	6.79612	3.27996e-06	IL10, KDR, AKT1, PRKCA, HIF1A, MTOR, VEGFA	103	77	19308	17.0415	0.00746996	0.000129276	0.000115421
GOTERM_BP_DIRECT	GO:0022617~extracellular matrix disassembly	6	5.82524	4.30205e-06	MMP12, MMP7, MMP2, MMP3, MMP8, MMP9	103	46	19308	24.4508	0.00978631	0.000166686	0.000148822
GOTERM_BP_DIRECT	GO:0038083~peptidyl-tyrosine autophosphorylation	5	4.85437	4.99089e-06	SRC, DYRK1A, KDR, EGFR, IGF1R	103	22	19308	42.6037	0.0113444	0.000190153	0.000169774
GOTERM_BP_DIRECT	GO:0032868~response to insulin	7	6.79612	5.84777e-06	IL10, CAT, FOS, MAPK14, RELA, MTOR, ICAM1	103	85	19308	15.4376	0.0132791	0.000217909	0.000194555
GOTERM_BP_DIRECT	GO:0007173~epidermal growth factor receptor signaling pathway	6	5.82524	5.91004e-06	ADAM17, TGFB1, SRC, AKT1, PTK2, EGFR	103	49	19308	22.9538	0.0134195	0.000217909	0.000194555
GOTERM_BP_DIRECT	GO:0008630~intrinsic apoptotic signaling pathway in response to DNA damage	6	5.82524	6.53931e-06	CASP9, BAX, PIK3R1, BCL2L1, MCL1, TNFRSF1A	103	50	19308	22.4948	0.0148377	0.000237284	0.000211853
GOTERM_BP_DIRECT	GO:0009636~response to toxic substance	7	6.79612	6.69478e-06	CDKN1A, PON1, CDK1, BAX, CYP1B1, FOS, SLC6A4	103	87	19308	15.0827	0.0151878	0.000239129	0.000213501
GOTERM_BP_DIRECT	GO:0007569~cell aging	5	4.85437	8.52639e-06	CDK1, TP53, MTOR, ICAM1, SOD1	103	25	19308	37.4913	0.0193027	0.000299867	0.000267729
GOTERM_BP_DIRECT	GO:0090398~cellular senescence	6	5.82524	9.59885e-06	CDKN1A, CDK2, MAPK14, HRAS, TP53, IGF1R	103	54	19308	20.8285	0.0217041	0.000327507	0.000292407
GOTERM_BP_DIRECT	GO:0010507~negative regulation of autophagy	6	5.82524	9.59885e-06	IL10, AKT1, MET, MTOR, BCL2L1, MCL1	103	54	19308	20.8285	0.0217041	0.000327507	0.000292407
GOTERM_BP_DIRECT	GO:0051000~positive regulation of nitric-oxide synthase activity	5	4.85437	1.00358e-05	TERT, AKT1, CALM1, HIF1A, ESR1	103	26	19308	36.0493	0.0226808	0.000337381	0.000301222
GOTERM_BP_DIRECT	GO:0031334~positive regulation of protein complex assembly	6	5.82524	1.05147e-05	GSK3B, TGFB1, IFNG, MMP3, BAX, VEGFA	103	55	19308	20.4498	0.0237501	0.00034338	0.000306578
GOTERM_BP_DIRECT	GO:1904707~positive regulation of vascular smooth muscle cell proliferation	6	5.82524	1.05147e-05	IL10, DNMT1, TERT, SRC, MMP2, MMP9	103	55	19308	20.4498	0.0237501	0.00034338	0.000306578
GOTERM_BP_DIRECT	GO:0071356~cellular response to tumor necrosis factor	8	7.76699	1.24072e-05	ABCC2, CYP1B1, AKT1, FOS, APOB, MAPK14, RELA, ICAM1	103	146	19308	10.2716	0.0279647	0.000399478	0.000356665
GOTERM_BP_DIRECT	GO:2001243~negative regulation of intrinsic apoptotic signaling pathway	5	4.85437	1.36336e-05	SRC, AKT1, MMP9, BCL2L1, MCL1	103	28	19308	33.4743	0.030686	0.000428298	0.000382395
GOTERM_BP_DIRECT	GO:0014823~response to activity	6	5.82524	1.36771e-05	IL10, MMP2, CAT, CDK1, FOS, MTOR	103	58	19308	19.392	0.0307822	0.000428298	0.000382395
GOTERM_BP_DIRECT	GO:0034644~cellular response to UV	6	5.82524	1.48811e-05	CASP9, BAX, PIK3R1, PTGS2, TP53, AURKB	103	59	19308	19.0634	0.0334464	0.000459706	0.000410438
GOTERM_BP_DIRECT	GO:0043525~positive regulation of neuron apoptotic process	6	5.82524	2.05465e-05	CASP9, CDK5, CASP3, BAX, NR3C1, TP53	103	63	19308	17.853	0.0458838	0.000626257	0.000559139
GOTERM_BP_DIRECT	GO:1903799~negative regulation of production of miRNAs involved in gene silencing by miRNA	4	3.8835	2.29025e-05	TGFB1, TERT, ESR1, TP53	103	11	19308	68.1659	0.0510087	0.000688883	0.000615052
GOTERM_BP_DIRECT	GO:0046677~response to antibiotic	5	4.85437	2.35592e-05	CASP9, CASP8, CASP3, TP53, SOD1	103	32	19308	29.29	0.0524324	0.000690466	0.000616466
GOTERM_BP_DIRECT	GO:0043552~positive regulation of phosphatidylinositol 3-kinase activity	5	4.85437	2.35592e-05	TGFB1, FLT3, SRC, KIT, PTK2	103	32	19308	29.29	0.0524324	0.000690466	0.000616466
GOTERM_BP_DIRECT	GO:0042127~regulation of cell proliferation	8	7.76699	2.63369e-05	TGFB1, NOS2, STAT1, CHEK1, KIT, HRAS, PTK2, PTGS1	103	164	19308	9.14421	0.0584303	0.000762103	0.000680425
GOTERM_BP_DIRECT	GO:0070374~positive regulation of ERK1 and ERK2 cascade	9	8.73786	2.91643e-05	TGFB1, SRC, CHRNA7, KDR, PRKCA, HRAS, EGFR, ICAM1, VEGFA	103	229	19308	7.36728	0.0644966	0.000833369	0.000744054
GOTERM_BP_DIRECT	GO:0035924~cellular response to vascular endothelial growth factor stimulus	5	4.85437	3.01379e-05	KDR, AKT1, MAPK14, RELA, VEGFA	103	34	19308	27.5671	0.0665765	0.000840185	0.000750139
GOTERM_BP_DIRECT	GO:0097193~intrinsic apoptotic signaling pathway	5	4.85437	3.01379e-05	CASP9, CDKN1A, BAX, HRAS, TP53	103	34	19308	27.5671	0.0665765	0.000840185	0.000750139
GOTERM_BP_DIRECT	GO:0007623~circadian rhythm	6	5.82524	3.43599e-05	GSK3B, NOS2, DYRK1A, TOP1, EGFR, SLC6A4	103	70	19308	16.0677	0.0755424	0.000946347	0.000844923
GOTERM_BP_DIRECT	GO:0046427~positive regulation of JAK-STAT cascade	5	4.85437	4.24012e-05	IL10, KIT, AKR1B1, CYP1B1, F2	103	37	19308	25.3319	0.0923816	0.00115392	0.00103025
GOTERM_BP_DIRECT	GO:0001890~placenta development	5	4.85437	5.23794e-05	HSP90AB1, PPARG, MAPK14, PTK2, SOD1	103	39	19308	24.0329	0.112851	0.0014087	0.00125772
GOTERM_BP_DIRECT	GO:0006508~proteolysis	11	10.6796	6.12903e-05	MMP12, DPP4, ADAM17, CASP8, MMP7, CASP3, MMP2, MMP3, F2, MMP8, MMP9	103	409	19308	5.04161	0.130741	0.00162918	0.00145458
GOTERM_BP_DIRECT	GO:0071276~cellular response to cadmium ion	5	4.85437	6.39707e-05	AKT1, FOS, MMP9, EGFR, SOD1	103	41	19308	22.8605	0.136051	0.00168089	0.00150074
GOTERM_BP_DIRECT	GO:0006919~activation of cysteine-type endopeptidase activity involved in apoptotic process	6	5.82524	7.36787e-05	CASP9, CASP8, BAX, PPARG, MAPT, XDH	103	82	19308	13.7163	0.155014	0.00190422	0.00170013
GOTERM_BP_DIRECT	GO:0071222~cellular response to lipopolysaccharide	8	7.76699	7.41362e-05	IL10, ABCC2, NOS2, SRC, AXL, MAPK14, RELA, ICAM1	103	193	19308	7.77021	0.155898	0.00190422	0.00170013
GOTERM_BP_DIRECT	GO:0090399~replicative senescence	4	3.8835	7.62495e-05	CDKN1A, TERT, CHEK1, TP53	103	16	19308	46.8641	0.159966	0.00193674	0.00172917
GOTERM_BP_DIRECT	GO:0045471~response to ethanol	7	6.79612	8.4597e-05	CASP8, CAT, CDK1, FOS, ICAM1, SOD1, IGF1R	103	136	19308	9.64849	0.175845	0.00210502	0.00187942
GOTERM_BP_DIRECT	GO:0007566~embryo implantation	5	4.85437	8.47164e-05	FUT7, MMP2, PTGS2, MMP9, SOD1	103	44	19308	21.3019	0.17607	0.00210502	0.00187942
GOTERM_BP_DIRECT	GO:0048009~insulin-like growth factor receptor signaling pathway	4	3.8835	9.22336e-05	AR, AKT1, PIK3R1, IGF1R	103	17	19308	44.1074	0.190109	0.00225209	0.00201073
GOTERM_BP_DIRECT	GO:0031100~animal organ regeneration	5	4.85437	9.26058e-05	CDKN1A, FLT3, AXL, CDK1, PPARG	103	45	19308	20.8285	0.190798	0.00225209	0.00201073
GOTERM_BP_DIRECT	GO:1904646~cellular response to beta-amyloid	5	4.85437	0.000109967	GSK3B, CDK5, ADRB2, ICAM1, IGF1R	103	47	19308	19.9422	0.222287	0.00262547	0.00234409
GOTERM_BP_DIRECT	GO:0035234~ectopic germ cell programmed cell death	4	3.8835	0.000110256	KIT, BAX, BCL2L1, SOD1	103	18	19308	41.657	0.222801	0.00262547	0.00234409
GOTERM_BP_DIRECT	GO:0033138~positive regulation of peptidyl-serine phosphorylation	6	5.82524	0.000120952	TGFB1, HSP90AB1, AKT1, PTGS2, EGFR, VEGFA	103	91	19308	12.3598	0.241576	0.00285048	0.00254498
GOTERM_BP_DIRECT	GO:0030307~positive regulation of cell growth	6	5.82524	0.000127371	ADAM17, CSNK2A1, AKT1, F2, EGFR, MTOR	103	92	19308	12.2254	0.252626	0.00297113	0.0026527
GOTERM_BP_DIRECT	GO:0050673~epithelial cell proliferation	5	4.85437	0.000129574	AR, KIT, KDR, EGFR, BCL2L1	103	49	19308	19.1282	0.25638	0.00298156	0.00266201
GOTERM_BP_DIRECT	GO:2000811~negative regulation of anoikis	4	3.8835	0.000130427	SRC, PTK2, BCL2L1, MCL1	103	19	19308	39.4645	0.257829	0.00298156	0.00266201
GOTERM_BP_DIRECT	GO:0050731~positive regulation of peptidyl-tyrosine phosphorylation	6	5.82524	0.000148205	TGFB1, SRC, TP53, MTOR, ICAM1, VEGFA	103	95	19308	11.8393	0.287391	0.00335442	0.00299491
GOTERM_BP_DIRECT	GO:0034097~response to cytokine	5	4.85437	0.000151596	STAT1, FOS, RELA, BCL2L1, MCL1	103	51	19308	18.3781	0.292895	0.00339754	0.00303341
GOTERM_BP_DIRECT	GO:0007275~multicellular organism development	8	7.76699	0.000153802	FLT3, AXL, KIT, KDR, F2, MET, EGFR, IGF1R	103	217	19308	6.91083	0.296451	0.00341351	0.00304767
GOTERM_BP_DIRECT	GO:0097191~extrinsic apoptotic signaling pathway	5	4.85437	0.000163566	GSK3B, TGFB1, CASP8, IFNG, BAX	103	52	19308	18.0246	0.311984	0.00359532	0.00320999
GOTERM_BP_DIRECT	GO:0042542~response to hydrogen peroxide	5	4.85437	0.000176205	STAT1, CASP3, MMP2, CAT, SOD1	103	53	19308	17.6846	0.331581	0.00379536	0.00338859
GOTERM_BP_DIRECT	GO:1902004~positive regulation of beta-amyloid formation	4	3.8835	0.000177648	IFNG, CHRNA7, CASP3, RELA	103	21	19308	35.706	0.333783	0.00379536	0.00338859
GOTERM_BP_DIRECT	GO:0032930~positive regulation of superoxide anion generation	4	3.8835	0.000177648	TGFB1, MAPT, EGFR, SOD1	103	21	19308	35.706	0.333783	0.00379536	0.00338859
GOTERM_BP_DIRECT	GO:0019221~cytokine-mediated signaling pathway	7	6.79612	0.000179607	FLT3, STAT1, KIT, AKT1, PRKACA, RELA, TNFRSF1A	103	156	19308	8.4115	0.33676	0.00380168	0.00339424
GOTERM_BP_DIRECT	GO:0034605~cellular response to heat	5	4.85437	0.000189533	CDKN1A, HSP90AB1, MAPT, PRKACA, PTGS2	103	54	19308	17.3571	0.351643	0.00397498	0.00354897
GOTERM_BP_DIRECT	GO:0031667~response to nutrient levels	5	4.85437	0.000203574	MMP7, SRC, PON1, MTOR, SOD1	103	55	19308	17.0415	0.372127	0.00423064	0.00377722
GOTERM_BP_DIRECT	GO:0045766~positive regulation of angiogenesis	7	6.79612	0.000235503	TERT, CHRNA7, KDR, CYP1B1, PRKCA, HIF1A, VEGFA	103	164	19308	8.00118	0.416332	0.00485009	0.00433029
GOTERM_BP_DIRECT	GO:0045861~negative regulation of proteolysis	4	3.8835	0.000267251	CDK5, AKT1, F2, TP53	103	24	19308	31.2427	0.457201	0.00540763	0.00482807
GOTERM_BP_DIRECT	GO:0071230~cellular response to amino acid stimulus	5	4.85437	0.000267306	DNMT1, MMP2, EGFR, MTOR, BCL2L1	103	59	19308	15.8861	0.45727	0.00540763	0.00482807
GOTERM_BP_DIRECT	GO:0032869~cellular response to insulin stimulus	6	5.82524	0.000281914	STAT1, PLA2G1B, SRC, AKT1, PPARG, PIK3R1	103	109	19308	10.3187	0.475099	0.00565311	0.00504724
GOTERM_BP_DIRECT	GO:0008286~insulin receptor signaling pathway	5	4.85437	0.000285245	GSK3B, PTPN1, AKT1, PIK3R1, IGF1R	103	60	19308	15.6214	0.479082	0.00567017	0.00506247
GOTERM_BP_DIRECT	GO:0097194~execution phase of apoptosis	4	3.8835	0.000302531	CASP9, CASP8, CASP3, AKT1	103	25	19308	29.993	0.499272	0.005911	0.00527749
GOTERM_BP_DIRECT	GO:0030225~macrophage differentiation	4	3.8835	0.000302531	CASP8, IFNG, MMP9, VEGFA	103	25	19308	29.993	0.499272	0.005911	0.00527749
GOTERM_BP_DIRECT	GO:0071902~positive regulation of protein serine/threonine kinase activity	5	4.85437	0.000344241	HSP90AB1, IFNG, SRC, ADRB2, CALM1	103	63	19308	14.8775	0.544824	0.00666894	0.0059542
GOTERM_BP_DIRECT	GO:0009612~response to mechanical stimulus	5	4.85437	0.000388122	STAT1, SRC, MMP2, PPARG, MPO	103	65	19308	14.4197	0.588283	0.00745585	0.00665677
GOTERM_BP_DIRECT	GO:0032025~response to cobalt ion	3	2.91262	0.000408842	CASP9, CASP8, CASP3	103	6	19308	93.7282	0.607337	0.00752546	0.00671893
GOTERM_BP_DIRECT	GO:1990962~drug transport across blood-brain barrier	3	2.91262	0.000408842	ABCB1, ABCC2, ABCG2	103	6	19308	93.7282	0.607337	0.00752546	0.00671893
GOTERM_BP_DIRECT	GO:0071393~cellular response to progesterone stimulus	3	2.91262	0.000408842	SRC, CYP1B1, IGF1R	103	6	19308	93.7282	0.607337	0.00752546	0.00671893
GOTERM_BP_DIRECT	GO:0061419~positive regulation of transcription from RNA polymerase II promoter in response to hypoxia	3	2.91262	0.000408842	HIF1A, TP53, VEGFA	103	6	19308	93.7282	0.607337	0.00752546	0.00671893
GOTERM_BP_DIRECT	GO:0001819~positive regulation of cytokine production	5	4.85437	0.000411497	IL10, IFNG, SRC, PIK3CG, SOD1	103	66	19308	14.2012	0.609714	0.00752546	0.00671893
GOTERM_BP_DIRECT	GO:0007611~learning or memory	5	4.85437	0.000411497	SRC, CHRNA7, CASP3, MAPT, EGFR	103	66	19308	14.2012	0.609714	0.00752546	0.00671893
GOTERM_BP_DIRECT	GO:0051091~positive regulation of sequence-specific DNA binding transcription factor activity	6	5.82524	0.000422763	IL10, KIT, AKT1, PPARG, ESR1, ESR2	103	119	19308	9.45158	0.619641	0.00766767	0.0068459
GOTERM_BP_DIRECT	GO:0046686~response to cadmium ion	4	3.8835	0.000425982	TERT, KIT, CAT, CDK1	103	28	19308	26.7795	0.622431	0.00766767	0.0068459
GOTERM_BP_DIRECT	GO:0035690~cellular response to drug	5	4.85437	0.000435861	KCNH2, ABCC2, NOS2, TP53, EGFR	103	67	19308	13.9893	0.630866	0.00778421	0.00694994
GOTERM_BP_DIRECT	GO:0006979~response to oxidative stress	6	5.82524	0.000456349	ABCC2, AKT1, PTGS2, MPO, TP53, PTGS1	103	121	19308	9.29535	0.647763	0.00804877	0.00718615
GOTERM_BP_DIRECT	GO:0030163~protein catabolic process	5	4.85437	0.000461237	CASP3, MMP2, AKT1, RELA, MTOR	103	68	19308	13.7836	0.651679	0.00804877	0.00718615
GOTERM_BP_DIRECT	GO:0010595~positive regulation of endothelial cell migration	5	4.85437	0.000461237	KDR, AKT1, PRKCA, PIK3CG, VEGFA	103	68	19308	13.7836	0.651679	0.00804877	0.00718615
GOTERM_BP_DIRECT	GO:0043154~negative regulation of cysteine-type endopeptidase activity involved in apoptotic process	5	4.85437	0.00048765	CSNK2A1, SRC, AKT1, PTGS2, VEGFA	103	69	19308	13.5838	0.672098	0.00844521	0.0075401
GOTERM_BP_DIRECT	GO:0010575~positive regulation of vascular endothelial growth factor production	4	3.8835	0.000523896	TGFB1, CYP1B1, PTGS2, HIF1A	103	30	19308	24.9942	0.698185	0.0090047	0.00803963
GOTERM_BP_DIRECT	GO:0010742~macrophage derived foam cell differentiation	3	2.91262	0.000570405	TGFB1, STAT1, PPARG	103	7	19308	80.3384	0.728642	0.00957155	0.00854572
GOTERM_BP_DIRECT	GO:0021766~hippocampus development	5	4.85437	0.000573342	GSK3B, PTPRS, CDK5, CASP3, IGF1R	103	72	19308	13.0178	0.730459	0.00957155	0.00854572
GOTERM_BP_DIRECT	GO:0050679~positive regulation of epithelial cell proliferation	5	4.85437	0.000573342	TGFB1, SCN5A, HRAS, EGFR, VEGFA	103	72	19308	13.0178	0.730459	0.00957155	0.00854572
GOTERM_BP_DIRECT	GO:0043200~response to amino acid	4	3.8835	0.00057781	CASP3, RELA, MTOR, ICAM1	103	31	19308	24.1879	0.7332	0.00957155	0.00854572
GOTERM_BP_DIRECT	GO:0071480~cellular response to gamma radiation	4	3.8835	0.00057781	CDKN1A, HRAS, TP53, BCL2L1	103	31	19308	24.1879	0.7332	0.00957155	0.00854572
GOTERM_BP_DIRECT	GO:0070301~cellular response to hydrogen peroxide	5	4.85437	0.00063609	SRC, AXL, CDK1, CYP1B1, RELA	103	74	19308	12.666	0.766498	0.0104612	0.00933999
GOTERM_BP_DIRECT	GO:0032091~negative regulation of protein binding	5	4.85437	0.000669222	GSK3B, CDKN1A, BAX, AKT1, AURKB	103	75	19308	12.4971	0.783541	0.0109274	0.00975631
GOTERM_BP_DIRECT	GO:0043388~positive regulation of DNA binding	4	3.8835	0.000695991	PPARG, CALM1, MMP8, MMP9	103	33	19308	22.722	0.796398	0.0112471	0.0100417
GOTERM_BP_DIRECT	GO:0097190~apoptotic signaling pathway	5	4.85437	0.00070356	CASP8, CASP3, PDE3A, BAX, PRKCA	103	76	19308	12.3327	0.799893	0.0112471	0.0100417
GOTERM_BP_DIRECT	GO:0007584~response to nutrient	5	4.85437	0.00070356	STAT1, CYP1B1, PPARG, MTOR, SLC6A4	103	76	19308	12.3327	0.799893	0.0112471	0.0100417
GOTERM_BP_DIRECT	GO:0051093~negative regulation of developmental process	3	2.91262	0.000757919	KIT, BCL2L1, SOD1	103	8	19308	70.2961	0.823292	0.0119885	0.0107037
GOTERM_BP_DIRECT	GO:0048144~fibroblast proliferation	4	3.8835	0.000760428	CDK1, HRAS, ESR1, TP53	103	34	19308	22.0537	0.824304	0.0119885	0.0107037
GOTERM_BP_DIRECT	GO:0008285~negative regulation of cell proliferation	10	9.70874	0.000786226	IL10, BCHE, AR, CDKN1A, TGFB1, CDK6, CYP1B1, PTGS2, HRAS, TP53	103	464	19308	4.04001	0.834373	0.0123104	0.010991
GOTERM_BP_DIRECT	GO:0030010~establishment of cell polarity	4	3.8835	0.000828541	GSK3B, HSP90AB1, PTK2, IGF1R	103	35	19308	21.4236	0.849656	0.0127976	0.011426
GOTERM_BP_DIRECT	GO:0097192~extrinsic apoptotic signaling pathway in absence of ligand	4	3.8835	0.000828541	GSK3B, BAX, BCL2L1, MCL1	103	35	19308	21.4236	0.849656	0.0127976	0.011426
GOTERM_BP_DIRECT	GO:2000352~negative regulation of endothelial cell apoptotic process	4	3.8835	0.000900411	IL10, TERT, KDR, ICAM1	103	36	19308	20.8285	0.872453	0.0137223	0.0122516
GOTERM_BP_DIRECT	GO:0007095~mitotic G2 DNA damage checkpoint	4	3.8835	0.000900411	CDKN1A, PLK1, CHEK1, CDK1	103	36	19308	20.8285	0.872453	0.0137223	0.0122516
GOTERM_BP_DIRECT	GO:0035357~peroxisome proliferator activated receptor signaling pathway	3	2.91262	0.00097111	NCOA2, RXRA, PPARG	103	9	19308	62.4854	0.891503	0.0145843	0.0130213
GOTERM_BP_DIRECT	GO:2000242~negative regulation of reproductive process	3	2.91262	0.00097111	KIT, BCL2L1, SOD1	103	9	19308	62.4854	0.891503	0.0145843	0.0130213
GOTERM_BP_DIRECT	GO:0032570~response to progesterone	4	3.8835	0.000976118	NCOA2, TGFB1, FOS, RELA	103	37	19308	20.2655	0.89274	0.0145843	0.0130213
GOTERM_BP_DIRECT	GO:0048678~response to axon injury	4	3.8835	0.00105574	AXL, CDK1, BAX, SOD1	103	38	19308	19.7322	0.910605	0.0154706	0.0138126
GOTERM_BP_DIRECT	GO:0045907~positive regulation of vasoconstriction	4	3.8835	0.00105574	AKT1, PTGS2, EGFR, ICAM1	103	38	19308	19.7322	0.910605	0.0154706	0.0138126
GOTERM_BP_DIRECT	GO:2001240~negative regulation of extrinsic apoptotic signaling pathway in absence of ligand	4	3.8835	0.00105574	TERT, AKT1, BCL2L1, MCL1	103	38	19308	19.7322	0.910605	0.0154706	0.0138126
GOTERM_BP_DIRECT	GO:0098586~cellular response to virus	5	4.85437	0.00111854	MMP12, IFNG, BAX, MAPK14, HIF1A	103	86	19308	10.8986	0.922573	0.0162866	0.0145411
GOTERM_BP_DIRECT	GO:0008625~extrinsic apoptotic signaling pathway via death domain receptors	4	3.8835	0.00113935	CASP8, BAX, PIK3R1, TNFRSF1A	103	39	19308	19.2263	0.926174	0.0163809	0.0146253
GOTERM_BP_DIRECT	GO:0046326~positive regulation of glucose import	4	3.8835	0.00113935	TERT, AKT1, PIK3R1, MAPK14	103	39	19308	19.2263	0.926174	0.0163809	0.0146253
GOTERM_BP_DIRECT	GO:0007166~cell surface receptor signaling pathway	8	7.76699	0.00117638	IFNG, CXCR1, ADRB2, F2, MAPK14, HRAS, MET, EGFR	103	305	19308	4.91689	0.932173	0.0168076	0.0150063
GOTERM_BP_DIRECT	GO:0010863~positive regulation of phospholipase C activity	3	2.91262	0.00120971	KIT, HRAS, ESR1	103	10	19308	56.2369	0.937154	0.0168976	0.0150866
GOTERM_BP_DIRECT	GO:0070633~transepithelial transport	3	2.91262	0.00120971	ABCB1, ABCC2, ABCG2	103	10	19308	56.2369	0.937154	0.0168976	0.0150866
GOTERM_BP_DIRECT	GO:0060068~vagina development	3	2.91262	0.00120971	AXL, BAX, ESR1	103	10	19308	56.2369	0.937154	0.0168976	0.0150866
GOTERM_BP_DIRECT	GO:0030183~B cell differentiation	5	4.85437	0.00121844	IL10, ADAM17, FLT3, KIT, PIK3R1	103	88	19308	10.6509	0.938397	0.0168976	0.0150866
GOTERM_BP_DIRECT	GO:0035094~response to nicotine	4	3.8835	0.00122703	CHRNA7, CASP3, MMP2, IGF1R	103	40	19308	18.7456	0.939597	0.0168976	0.0150866
GOTERM_BP_DIRECT	GO:0010634~positive regulation of epithelial cell migration	4	3.8835	0.00122703	IFNG, SRC, HIF1A, PTK2	103	40	19308	18.7456	0.939597	0.0168976	0.0150866
GOTERM_BP_DIRECT	GO:0030316~osteoclast differentiation	4	3.8835	0.00131885	TGFB1, FOS, PIK3R1, MAPK14	103	41	19308	18.2884	0.951047	0.0177053	0.0158077
GOTERM_BP_DIRECT	GO:1901796~regulation of signal transduction by p53 class mediator	4	3.8835	0.00131885	CHEK1, AKT1, MTOR, AURKB	103	41	19308	18.2884	0.951047	0.0177053	0.0158077
GOTERM_BP_DIRECT	GO:0071479~cellular response to ionizing radiation	4	3.8835	0.00131885	CDKN1A, TGFB1, MAPK14, TP53	103	41	19308	18.2884	0.951047	0.0177053	0.0158077
GOTERM_BP_DIRECT	GO:0007265~Ras protein signal transduction	5	4.85437	0.00132441	CDKN1A, DNMT1, CDK2, HRAS, TP53	103	90	19308	10.4142	0.951666	0.0177053	0.0158077
GOTERM_BP_DIRECT	GO:0071347~cellular response to interleukin-1	5	4.85437	0.00132441	ABCC2, MMP2, HIF1A, RELA, ICAM1	103	90	19308	10.4142	0.951666	0.0177053	0.0158077
GOTERM_BP_DIRECT	GO:0008360~regulation of cell shape	6	5.82524	0.00139255	KIT, KDR, F2, PTK2, ICAM1, VEGFA	103	155	19308	7.25637	0.958646	0.0185079	0.0165244
GOTERM_BP_DIRECT	GO:0032465~regulation of cytokinesis	4	3.8835	0.00141489	PLK1, CALM1, AURKB, BCL2L1	103	42	19308	17.853	0.960708	0.0186961	0.0166924
GOTERM_BP_DIRECT	GO:0071492~cellular response to UV-A	3	2.91262	0.00147344	MMP2, MMP3, MMP9	103	11	19308	51.1244	0.965637	0.0192474	0.0171845
GOTERM_BP_DIRECT	GO:0009651~response to salt stress	3	2.91262	0.00147344	HSP90AB1, BAX, TP53	103	11	19308	51.1244	0.965637	0.0192474	0.0171845
GOTERM_BP_DIRECT	GO:0009409~response to cold	4	3.8835	0.0015152	CASP8, PPARG, FOS, ADRB2	103	43	19308	17.4378	0.96877	0.0195692	0.0174719
GOTERM_BP_DIRECT	GO:0007281~germ cell development	4	3.8835	0.0015152	BAX, AKT1, MTOR, BCL2L1	103	43	19308	17.4378	0.96877	0.0195692	0.0174719
GOTERM_BP_DIRECT	GO:0051092~positive regulation of NF-kappaB transcription factor activity	6	5.82524	0.00160196	AR, TGFB1, PLA2G1B, CAT, RELA, ICAM1	103	160	19308	7.02961	0.974396	0.0205735	0.0183685
GOTERM_BP_DIRECT	GO:0014065~phosphatidylinositol 3-kinase signaling	4	3.8835	0.00172896	AKT1, PIK3R1, PIK3CG, IGF1R	103	45	19308	16.6628	0.980857	0.0218915	0.0195453
GOTERM_BP_DIRECT	GO:0090557~establishment of endothelial intestinal barrier	3	2.91262	0.00176205	PTPRS, FASN, ICAM1	103	12	19308	46.8641	0.982254	0.0218915	0.0195453
GOTERM_BP_DIRECT	GO:0043117~positive regulation of vascular permeability	3	2.91262	0.00176205	TGFB1, PDE3A, VEGFA	103	12	19308	46.8641	0.982254	0.0218915	0.0195453
GOTERM_BP_DIRECT	GO:2000273~positive regulation of receptor activity	3	2.91262	0.00176205	IL10, IFNG, HIF1A	103	12	19308	46.8641	0.982254	0.0218915	0.0195453
GOTERM_BP_DIRECT	GO:1903800~positive regulation of production of miRNAs involved in gene silencing by miRNA	3	2.91262	0.00176205	TGFB1, TP53, EGFR	103	12	19308	46.8641	0.982254	0.0218915	0.0195453
GOTERM_BP_DIRECT	GO:0060333~interferon-gamma-mediated signaling pathway	3	2.91262	0.00176205	IFNG, STAT1, TP53	103	12	19308	46.8641	0.982254	0.0218915	0.0195453
GOTERM_BP_DIRECT	GO:0030198~extracellular matrix organization	6	5.82524	0.00183366	MMP12, MMP7, MMP2, MMP3, MMP8, MMP9	103	165	19308	6.81659	0.984938	0.0226079	0.0201849
GOTERM_BP_DIRECT	GO:0006366~transcription from RNA polymerase II promoter	7	6.79612	0.00183949	AR, FOS, ADRB2, PIK3R1, MAPK14, ESR1, TNFRSF1A	103	243	19308	5.39998	0.985138	0.0226079	0.0201849
GOTERM_BP_DIRECT	GO:0051591~response to cAMP	4	3.8835	0.00196067	STAT1, FOS, TYR, RELA	103	47	19308	15.9537	0.98874	0.0239684	0.0213996
GOTERM_BP_DIRECT	GO:0007179~transforming growth factor beta receptor signaling pathway	5	4.85437	0.00202474	TGFB1, SRC, FOS, TP53, PTK2	103	101	19308	9.28002	0.990277	0.02462	0.0219814
GOTERM_BP_DIRECT	GO:2001020~regulation of response to DNA damage stimulus	3	2.91262	0.00207526	CASP9, MAPT, MCL1	103	13	19308	43.2591	0.991339	0.0249686	0.0222926
GOTERM_BP_DIRECT	GO:0051974~negative regulation of telomerase activity	3	2.91262	0.00207526	SRC, PPARG, TP53	103	13	19308	43.2591	0.991339	0.0249686	0.0222926
GOTERM_BP_DIRECT	GO:0046718~viral entry into host cell	5	4.85437	0.00209894	DPP4, AXL, CDK1, EGFR, ICAM1	103	102	19308	9.18903	0.991797	0.0249905	0.0223121
GOTERM_BP_DIRECT	GO:0006805~xenobiotic metabolic process	5	4.85437	0.00209894	BCHE, ABCB1, ABCC2, NR1I2, CYP1B1	103	102	19308	9.18903	0.991797	0.0249905	0.0223121
GOTERM_BP_DIRECT	GO:0006606~protein import into nucleus	5	4.85437	0.00217499	MMP12, CDKN1A, AKT1, PIK3R1, TP53	103	103	19308	9.09982	0.993108	0.025629	0.0228823
GOTERM_BP_DIRECT	GO:0042060~wound healing	5	4.85437	0.00217499	CDKN1A, TGFB1, CASP3, EGFR, MTOR	103	103	19308	9.09982	0.993108	0.025629	0.0228823
GOTERM_BP_DIRECT	GO:0021549~cerebellum development	4	3.8835	0.00221084	PTPRS, SCN5A, TP53, IGF1R	103	49	19308	15.3026	0.993652	0.0259179	0.0231402
GOTERM_BP_DIRECT	GO:1904996~positive regulation of leukocyte adhesion to vascular endothelial cell	3	2.91262	0.00241281	FUT7, RELA, ICAM1	103	14	19308	40.1692	0.996004	0.0281412	0.0251252
GOTERM_BP_DIRECT	GO:0008542~visual learning	4	3.8835	0.00247997	CDK5, KIT, HIF1A, MTOR	103	51	19308	14.7025	0.996574	0.0284885	0.0254353
GOTERM_BP_DIRECT	GO:0048013~ephrin receptor signaling pathway	4	3.8835	0.00247997	SRC, MMP2, MMP9, PTK2	103	51	19308	14.7025	0.996574	0.0284885	0.0254353
GOTERM_BP_DIRECT	GO:1900087~positive regulation of G1/S transition of mitotic cell cycle	4	3.8835	0.00247997	ADAM17, TERT, AKT1, EGFR	103	51	19308	14.7025	0.996574	0.0284885	0.0254353
GOTERM_BP_DIRECT	GO:0045737~positive regulation of cyclin-dependent protein serine/threonine kinase activity	4	3.8835	0.00262179	ADAM17, SRC, AKT1, EGFR	103	52	19308	14.4197	0.997524	0.0299671	0.0267554
GOTERM_BP_DIRECT	GO:0035556~intracellular signal transduction	9	8.73786	0.00269275	GSK3B, PLA2G1B, SRC, CHEK1, KIT, AKT1, PRKCA, PKN1, MAPK14	103	451	19308	3.74081	0.997896	0.0304922	0.0272242
GOTERM_BP_DIRECT	GO:0009408~response to heat	4	3.8835	0.00276853	ABCC2, AKT1, MTOR, SOD1	103	53	19308	14.1476	0.998232	0.0304922	0.0272242
GOTERM_BP_DIRECT	GO:0043491~protein kinase B signaling	4	3.8835	0.00276853	TGFB1, AXL, KDR, AKT1	103	53	19308	14.1476	0.998232	0.0304922	0.0272242
GOTERM_BP_DIRECT	GO:0071498~cellular response to fluid shear stress	3	2.91262	0.00277444	SRC, MMP2, PTGS2	103	15	19308	37.4913	0.998255	0.0304922	0.0272242
GOTERM_BP_DIRECT	GO:0097435~supramolecular fiber organization	3	2.91262	0.00277444	HSP90AB1, BAX, MAPT	103	15	19308	37.4913	0.998255	0.0304922	0.0272242
GOTERM_BP_DIRECT	GO:0046626~regulation of insulin receptor signaling pathway	3	2.91262	0.00277444	PTPN1, FUT7, PIK3R1	103	15	19308	37.4913	0.998255	0.0304922	0.0272242
GOTERM_BP_DIRECT	GO:0046685~response to arsenic-containing substance	3	2.91262	0.00277444	CDKN1A, ABCC2, CYP1B1	103	15	19308	37.4913	0.998255	0.0304922	0.0272242
GOTERM_BP_DIRECT	GO:1900034~regulation of cellular response to heat	3	2.91262	0.00277444	GSK3B, MAPT, MTOR	103	15	19308	37.4913	0.998255	0.0304922	0.0272242
GOTERM_BP_DIRECT	GO:0009615~response to virus	5	4.85437	0.00285314	CDK6, IFNG, SRC, APOB, BCL2L1	103	111	19308	8.44398	0.998543	0.0312071	0.0278625
GOTERM_BP_DIRECT	GO:0016477~cell migration	7	6.79612	0.00294213	TGFB1, AXL, CDK1, KDR, MET, PTK2, PIK3CG	103	267	19308	4.91458	0.998812	0.0319279	0.028506
GOTERM_BP_DIRECT	GO:0008584~male gonad development	5	4.85437	0.00294697	AR, KIT, CYP1B1, ESR1, BCL2L1	103	112	19308	8.36859	0.998825	0.0319279	0.028506
GOTERM_BP_DIRECT	GO:0016241~regulation of macroautophagy	4	3.8835	0.00307696	CDK5, CASP3, PRKACA, MTOR	103	55	19308	13.6332	0.999128	0.0328342	0.0293152
GOTERM_BP_DIRECT	GO:0033209~tumor necrosis factor-mediated signaling pathway	4	3.8835	0.00307696	STAT1, TP53, RELA, TNFRSF1A	103	55	19308	13.6332	0.999128	0.0328342	0.0293152
GOTERM_BP_DIRECT	GO:0010763~positive regulation of fibroblast migration	3	2.91262	0.0031599	TGFB1, AKT1, PTK2	103	16	19308	35.1481	0.999279	0.0328342	0.0293152
GOTERM_BP_DIRECT	GO:0038084~vascular endothelial growth factor signaling pathway	3	2.91262	0.0031599	FLT3, KDR, VEGFA	103	16	19308	35.1481	0.999279	0.0328342	0.0293152
GOTERM_BP_DIRECT	GO:0051146~striated muscle cell differentiation	3	2.91262	0.0031599	CASP3, AKT1, MAPK14	103	16	19308	35.1481	0.999279	0.0328342	0.0293152
GOTERM_BP_DIRECT	GO:1904019~epithelial cell apoptotic process	3	2.91262	0.0031599	CASP9, CASP3, BAX	103	16	19308	35.1481	0.999279	0.0328342	0.0293152
GOTERM_BP_DIRECT	GO:0046688~response to copper ion	3	2.91262	0.0031599	CDK1, ICAM1, SOD1	103	16	19308	35.1481	0.999279	0.0328342	0.0293152
GOTERM_BP_DIRECT	GO:0032516~positive regulation of phosphoprotein phosphatase activity	3	2.91262	0.0031599	HSP90AB1, CALM1, MTOR	103	16	19308	35.1481	0.999279	0.0328342	0.0293152
GOTERM_BP_DIRECT	GO:0043129~surfactant homeostasis	3	2.91262	0.0031599	TGFB1, KDR, VEGFA	103	16	19308	35.1481	0.999279	0.0328342	0.0293152
GOTERM_BP_DIRECT	GO:1903078~positive regulation of protein localization to plasma membrane	4	3.8835	0.00340571	IFNG, AKT1, PIK3R1, EGFR	103	57	19308	13.1548	0.99959	0.0350696	0.031311
GOTERM_BP_DIRECT	GO:0045786~negative regulation of cell cycle	4	3.8835	0.00340571	TGFB1, CDK6, CDK5, PTGS2	103	57	19308	13.1548	0.99959	0.0350696	0.031311
GOTERM_BP_DIRECT	GO:0060065~uterus development	3	2.91262	0.00356892	SRC, ESR1, CYP19A1	103	17	19308	33.0805	0.999718	0.0362602	0.0323741
GOTERM_BP_DIRECT	GO:0008637~apoptotic mitochondrial changes	3	2.91262	0.00356892	BAX, AKT1, BCL2L1	103	17	19308	33.0805	0.999718	0.0362602	0.0323741
GOTERM_BP_DIRECT	GO:0048143~astrocyte activation	3	2.91262	0.00356892	IFNG, MAPT, EGFR	103	17	19308	33.0805	0.999718	0.0362602	0.0323741
GOTERM_BP_DIRECT	GO:0006974~cellular response to DNA damage stimulus	7	6.79612	0.00358707	CASP9, CDKN1A, CASP3, CHEK1, AKT1, TP53, MTOR	103	278	19308	4.72012	0.999729	0.0362834	0.0323948
GOTERM_BP_DIRECT	GO:0035162~embryonic hemopoiesis	3	2.91262	0.00400125	KIT, KDR, HIF1A	103	18	19308	31.2427	0.999895	0.039769	0.0355068
GOTERM_BP_DIRECT	GO:0033280~response to vitamin D	3	2.91262	0.00400125	TGFB1, TYR, PTGS2	103	18	19308	31.2427	0.999895	0.039769	0.0355068
GOTERM_BP_DIRECT	GO:0051770~positive regulation of nitric-oxide synthase biosynthetic process	3	2.91262	0.00400125	IFNG, STAT1, KDR	103	18	19308	31.2427	0.999895	0.039769	0.0355068
GOTERM_BP_DIRECT	GO:0060749~mammary gland alveolus development	3	2.91262	0.00400125	AR, ESR1, VEGFA	103	18	19308	31.2427	0.999895	0.039769	0.0355068
GOTERM_BP_DIRECT	GO:0030224~monocyte differentiation	3	2.91262	0.00445664	FASN, PPARG, VEGFA	103	19	19308	29.5984	0.999963	0.043538	0.0388718
GOTERM_BP_DIRECT	GO:2000573~positive regulation of DNA biosynthetic process	3	2.91262	0.00445664	SRC, CYP1B1, VEGFA	103	19	19308	29.5984	0.999963	0.043538	0.0388718
GOTERM_BP_DIRECT	GO:0021954~central nervous system neuron development	3	2.91262	0.00445664	CDK5, MAP2, MAPT	103	19	19308	29.5984	0.999963	0.043538	0.0388718
GOTERM_BP_DIRECT	GO:0031668~cellular response to extracellular stimulus	3	2.91262	0.00445664	CDKN1A, AXL, FOS	103	19	19308	29.5984	0.999963	0.043538	0.0388718
GOTERM_BP_DIRECT	GO:0030308~negative regulation of cell growth	5	4.85437	0.00461775	CDKN1A, TGFB1, PPARG, TP53, ESR2	103	127	19308	7.38017	0.999975	0.0449199	0.0401057
GOTERM_BP_DIRECT	GO:0030168~platelet activation	4	3.8835	0.00472203	SRC, AXL, F2, MAPK14	103	64	19308	11.716	0.99998	0.0457397	0.0408376
GOTERM_BP_DIRECT	GO:0051412~response to corticosterone	3	2.91262	0.00493484	CDKN1A, FOS, CALM1	103	20	19308	28.1184	0.999988	0.0466159	0.0416199
GOTERM_BP_DIRECT	GO:0055093~response to hyperoxia	3	2.91262	0.00493484	CDKN1A, MMP2, CAT	103	20	19308	28.1184	0.999988	0.0466159	0.0416199
GOTERM_BP_DIRECT	GO:0044849~estrous cycle	3	2.91262	0.00493484	MMP7, CYP1B1, IGF1R	103	20	19308	28.1184	0.999988	0.0466159	0.0416199
GOTERM_BP_DIRECT	GO:0010165~response to X-ray	3	2.91262	0.00493484	CDKN1A, CASP3, TP53	103	20	19308	28.1184	0.999988	0.0466159	0.0416199
GOTERM_BP_DIRECT	GO:0035994~response to muscle stretch	3	2.91262	0.00493484	FOS, MAPK14, RELA	103	20	19308	28.1184	0.999988	0.0466159	0.0416199
GOTERM_BP_DIRECT	GO:0030889~negative regulation of B cell proliferation	3	2.91262	0.00493484	IL10, CASP3, PKN1	103	20	19308	28.1184	0.999988	0.0466159	0.0416199
GOTERM_BP_DIRECT	GO:0016310~phosphorylation	5	4.85437	0.00501488	CDK5, AKT1, TOP1, MTOR, PIK3CG	103	130	19308	7.20986	0.99999	0.047177	0.0421209
GOTERM_BP_DIRECT	GO:0042752~regulation of circadian rhythm	4	3.8835	0.00514698	GSK3B, CDK1, PPARG, MTOR	103	66	19308	11.361	0.999992	0.0482213	0.0430533
GOTERM_BP_DIRECT	GO:0051384~response to glucocorticoid	4	3.8835	0.00536782	IL10, BCHE, CASP3, PTGS2	103	67	19308	11.1914	0.999995	0.050085	0.0447172
GOTERM_BP_DIRECT	GO:1902894~negative regulation of pri-miRNA transcription from RNA polymerase II promoter	3	2.91262	0.0054356	TGFB1, PPARG, RELA	103	21	19308	26.7795	0.999996	0.0503068	0.0449152
GOTERM_BP_DIRECT	GO:0002042~cell migration involved in sprouting angiogenesis	3	2.91262	0.0054356	KDR, AKT1, VEGFA	103	21	19308	26.7795	0.999996	0.0503068	0.0449152
GOTERM_BP_DIRECT	GO:0071560~cellular response to transforming growth factor beta stimulus	4	3.8835	0.0058264	TGFB1, PDE3A, NR3C1, IGF1R	103	69	19308	10.867	0.999998	0.053002	0.0473216
GOTERM_BP_DIRECT	GO:0042531~positive regulation of tyrosine phosphorylation of STAT protein	4	3.8835	0.0058264	IFNG, FLT3, KIT, TNFRSF1A	103	69	19308	10.867	0.999998	0.053002	0.0473216
GOTERM_BP_DIRECT	GO:0030517~negative regulation of axon extension	3	2.91262	0.00595867	PTPRS, CDK5, MAP2	103	22	19308	25.5622	0.999999	0.053002	0.0473216
GOTERM_BP_DIRECT	GO:0031929~TOR signaling	3	2.91262	0.00595867	AKT1, HIF1A, MTOR	103	22	19308	25.5622	0.999999	0.053002	0.0473216
GOTERM_BP_DIRECT	GO:0071354~cellular response to interleukin-6	3	2.91262	0.00595867	ABCC2, RELA, ICAM1	103	22	19308	25.5622	0.999999	0.053002	0.0473216
GOTERM_BP_DIRECT	GO:1903076~regulation of protein localization to plasma membrane	3	2.91262	0.00595867	AR, CDK5, PIK3R1	103	22	19308	25.5622	0.999999	0.053002	0.0473216
GOTERM_BP_DIRECT	GO:0006809~nitric oxide biosynthetic process	3	2.91262	0.00595867	NOS2, CYP1B1, AKT1	103	22	19308	25.5622	0.999999	0.053002	0.0473216
GOTERM_BP_DIRECT	GO:0001836~release of cytochrome c from mitochondria	3	2.91262	0.00595867	BAX, TP53, BCL2L1	103	22	19308	25.5622	0.999999	0.053002	0.0473216
GOTERM_BP_DIRECT	GO:0045780~positive regulation of bone resorption	3	2.91262	0.00595867	SRC, PRKCA, EGFR	103	22	19308	25.5622	0.999999	0.053002	0.0473216
GOTERM_BP_DIRECT	GO:0030520~intracellular estrogen receptor signaling pathway	3	2.91262	0.00595867	AR, ESR1, ESR2	103	22	19308	25.5622	0.999999	0.053002	0.0473216
GOTERM_BP_DIRECT	GO:1901224~positive regulation of NIK/NF-kappaB signaling	4	3.8835	0.00606421	MMP8, RELA, EGFR, NR3C2	103	70	19308	10.7118	0.999999	0.0537318	0.0479731
GOTERM_BP_DIRECT	GO:0007507~heart development	6	5.82524	0.00613654	CDKN1A, TGFB1, CASP8, CASP3, MMP2, PPARG	103	219	19308	5.13579	0.999999	0.0541627	0.0483579
GOTERM_BP_DIRECT	GO:0043627~response to estrogen	4	3.8835	0.00630777	ABCC2, MMP2, PPARG, ESR1	103	71	19308	10.5609	0.999999	0.0554598	0.049516
