# Supplementary material for: Mechanism of Smilax china L. in the treatment of intrauterine adhesions based on network pharmacology, molecular docking and experimental validation
Source: BMC Complement Med Ther. 2024 Apr 5;24:150. doi: 10.1186/s12906-024-04414-4 (PMC10996135; doi:10.1186/s12906-024-04414-4)
Supplement: Supplementary file 7 — Supplementary Material 7 [file 12906_2024_4414_MOESM7_ESM.xlsx]

## Sheet: Sheet1
Supplementary Table 7 Results of the cellular component category terms from GO analysis
Category	Term	Count	%	PValue	Genes	List Total	Pop Hits	Pop Total	Fold Enrichment	Bonferroni	Benjamini	FDR
GOTERM_CC_DIRECT	GO:0032991~macromolecular complex	21	20.3883	2.18172e-10	NCOA2, PTPN1, CDKN1A, HSP90AB1, STAT1, PIK3R1, PTGS2, NR3C1, HIF1A, ESR1, EGFR, SOD1, CASP9, AR, CASP8, CAT, CHEK1, AKT1, PKN1, CALM1, TP53	103	703	20562	5.96337	6.82878e-08	6.82878e-08	6.04336e-08
GOTERM_CC_DIRECT	GO:0005654~nucleoplasm	48	46.6019	6.79037e-10	GSK3B, CDKN1A, DNMT1, ABCB1, HSP90AB1, SRC, NR1I2, AKR1B1, NR3C1, MPO, HIF1A, RELA, AURKB, NR3C2, CASP8, RXRA, TERT, CASP3, CHEK1, AKT1, SCN5A, PRKACA, HRAS, MCL1, NCOA2, NOS2, CSNK2A1, STAT1, PLK1, DYRK1A, PRKCA, FOS, MAPK14, ESR1, MTOR, ESR2, SOD1, AR, CDK6, CDK5, CDK2, CDK1, PPARG, PKN1, TOP1, CALM1, TP53, ABCG2	103	3963	20562	2.41794	2.12539e-07	1.06269e-07	9.40467e-08
GOTERM_CC_DIRECT	GO:0005829~cytosol	57	55.3398	1.72566e-09	GSK3B, CDKN1A, PTPRS, HSP90AB1, FLT3, AKR1B1, NR3C1, PIK3CG, NR3C2, CASP9, CASP8, CASP3, CHEK1, AKT1, PRKACA, HRAS, DGAT2, CSNK2A1, PRKCA, FOS, AR, ADAM17, CAT, PPARG, MAPT, TP53, SRC, PIK3R1, HIF1A, RELA, AURKB, RXRA, TERT, MAP2, APOB, XDH, MCL1, PTPN1, NOS2, STAT1, PLK1, TYR, MAPK14, ESR1, MTOR, PTK2, SOD1, CDK6, CDK5, FASN, CDK2, PDE3A, CDK1, BAX, PKN1, CALM1, BCL2L1	103	5510	20562	2.06515	5.4013e-07	1.80043e-07	1.59336e-07
GOTERM_CC_DIRECT	GO:0043235~receptor complex	12	11.6505	1.07884e-08	RXRA, FLT3, AXL, KIT, KDR, PPARG, ADRB2, MET, EGFR, NR3C2, IGF1R, TNFRSF1A	103	217	20562	11.0395	3.37676e-06	8.44192e-07	7.47097e-07
GOTERM_CC_DIRECT	GO:0009986~cell surface	18	17.4757	1.5654e-08	KCNH2, ACHE, TGFB1, ABCB1, MMP7, ABCC2, HSP90AB1, PLA2G1B, EGFR, FUT4, ICAM1, TNFRSF1A, VEGFA, DPP4, ADAM17, AXL, SCN5A, MET	103	639	20562	5.62341	4.89969e-06	9.79941e-07	8.67232e-07
GOTERM_CC_DIRECT	GO:0005634~nucleus	57	55.3398	4.3158e-08	ACHE, GSK3B, CDKN1A, HSP90AB1, FLT3, NR3C1, MPO, IGF1R, NR3C2, CASP9, CASP3, CHEK1, KDR, CYP1B1, AKT1, PRKACA, NCOA2, CSNK2A1, MMP2, DYRK1A, PRKCA, FOS, MMP12, AR, PPARG, MAPT, TOP1, TP53, DNMT1, NR1I2, ADRB2, PIK3R1, HIF1A, EGFR, RELA, AURKB, RXRA, TERT, MCL1, TGFB1, NOS2, STAT1, PLK1, TYR, MAPK14, ESR1, MTOR, ESR2, PTK2, SOD1, CDK6, CDK5, CDK2, CDK1, BAX, PKN1, CALM1	103	5984	20562	1.90157	1.35084e-05	2.24644e-06	1.98806e-06
GOTERM_CC_DIRECT	GO:0045121~membrane raft	12	11.6505	5.02399e-08	DPP4, ADAM17, CASP8, SRC, CASP3, KDR, MAPT, EGFR, SLC6A4, ABCG2, ICAM1, TNFRSF1A	103	252	20562	9.50624	1.5725e-05	2.24644e-06	1.98806e-06
GOTERM_CC_DIRECT	GO:0005737~cytoplasm	54	52.4272	8.70311e-08	GSK3B, HSP90AB1, NR3C1, PIK3CG, IGF1R, CASP9, CASP8, CASP3, CHEK1, AKT1, PRKACA, HRAS, NCOA2, DYRK1A, PRKCA, MMP12, AR, ADAM17, CAT, PPARG, MAPT, TP53, SRC, PIK3R1, PTGS2, HIF1A, EGFR, RELA, PTGS1, TERT, MAP2, APOB, MCL1, PTPN1, TGFB1, NOS2, STAT1, PLK1, TYR, MAPK14, ESR1, MTOR, PTK2, SOD1, VEGFA, CDK6, CDK5, FASN, CDK2, CDK1, BAX, PKN1, CALM1, BCL2L1	103	5576	20562	1.9333	2.72404e-05	3.40509e-06	3.01345e-06
GOTERM_CC_DIRECT	GO:0016020~membrane	34	33.0097	1.04812e-07	ACHE, ABCB1, HSP90AB1, ADRB2, PIK3R1, NR3C1, CYP19A1, FUT4, EGFR, PIK3CG, IGF1R, ICAM1, DPP4, FUT7, PRKACA, HRAS, MCL1, BCHE, ABCC2, PRKCA, FOS, ESR1, MTOR, TNFRSF1A, VEGFA, ADAM17, CDK5, FASN, CAT, CDK1, BAX, MAPT, MET, ABCG2	103	2547	20562	2.66488	3.28056e-05	3.64513e-06	3.22588e-06
GOTERM_CC_DIRECT	GO:0005739~mitochondrion	24	23.301	4.32152e-07	GSK3B, DGAT2, HSP90AB1, SRC, MMP2, PRKCA, MAPK14, NR3C1, ESR2, SOD1, TNFRSF1A, CASP9, CASP8, RXRA, CAT, CDK1, BAX, CYP1B1, AKT1, MAPT, PRKACA, TP53, MCL1, BCL2L1	103	1437	20562	3.33413	0.000135254	1.35264e-05	1.19706e-05
GOTERM_CC_DIRECT	GO:0005886~plasma membrane	49	47.5728	7.27407e-07	ACHE, GSK3B, PTPRS, HSP90AB1, FLT3, PIK3CG, SLC6A4, IGF1R, ICAM1, KDR, AKT1, SCN5A, PRKACA, HRAS, KCNH2, ABCC2, CSNK2A1, MMP2, PRKCA, F2, TNFRSF1A, AR, ADAM17, CAT, KIT, MAPT, MET, ABCG2, ABCB1, SRC, CHRNA7, ADRB2, PIK3R1, EGFR, DPP4, TERT, CXCR1, APOB, PTPN1, BCHE, TGFB1, NOS2, ESR1, PTK2, SOD1, CDK5, AXL, FASN, CALM1	103	5071	20562	1.92899	0.000227652	2.0698e-05	1.83174e-05
GOTERM_CC_DIRECT	GO:0048471~perinuclear region of cytoplasm	17	16.5049	1.08459e-06	KCNH2, ACHE, CDKN1A, DGAT2, HSP90AB1, NOS2, STAT1, SRC, AKR1B1, PRKCA, PIK3R1, TYR, EGFR, PPARG, SCN5A, PRKACA, HRAS	103	764	20562	4.44205	0.00033942	2.82898e-05	2.5036e-05
GOTERM_CC_DIRECT	GO:0005615~extracellular space	27	26.2136	1.90889e-06	ACHE, PLA2G1B, PON1, AKR1B1, MPO, EGFR, ICAM1, CHEK1, APOB, XDH, IL10, BCHE, TGFB1, MMP7, MMP2, MMP3, MMP8, F2, MMP9, TNFRSF1A, SOD1, VEGFA, MMP12, IFNG, AXL, CAT, KIT	103	1938	20562	2.78124	0.000597304	4.59602e-05	4.0674e-05
GOTERM_CC_DIRECT	GO:0005576~extracellular region	27	26.2136	1.06397e-05	ACHE, HSP90AB1, PLA2G1B, PON1, MPO, DPP4, KDR, APOB, IL10, BCHE, TGFB1, MMP7, MMP2, MMP3, MAPK14, MMP8, F2, MMP9, TNFRSF1A, SOD1, VEGFA, MMP12, IFNG, CAT, MAPT, CALM1, MET	103	2129	20562	2.53172	0.00332472	0.000237874	0.000210515
GOTERM_CC_DIRECT	GO:0005667~transcription factor complex	9	8.73786	2.05212e-05	NCOA2, RXRA, NR1I2, CDK2, FOS, HIF1A, ESR1, TP53, RELA	103	232	20562	7.74431	0.00640262	0.00042821	0.000378959
GOTERM_CC_DIRECT	GO:0043025~neuronal cell body	11	10.6796	3.5578e-05	TGFB1, HSP90AB1, CDK5, MAP2, SRC, CASP3, MAPT, APOB, MTOR, SOD1, IGF1R	103	408	20562	5.38221	0.0110743	0.000695995	0.000615945
GOTERM_CC_DIRECT	GO:0000307~cyclin-dependent protein kinase holoenzyme complex	5	4.85437	4.54684e-05	CDKN1A, CDK6, CDK5, CDK2, CDK1	103	40	20562	24.9539	0.0141311	0.000837153	0.000740867
GOTERM_CC_DIRECT	GO:0043005~neuron projection	10	9.70874	0.000110927	CASP8, CDK5, MAP2, SRC, CHRNA7, FOS, MAPT, PTGS2, SLC6A4, PTGS1	103	378	20562	5.28125	0.0341262	0.0019289	0.00170704
GOTERM_CC_DIRECT	GO:0000785~chromatin	16	15.534	0.000223876	NCOA2, STAT1, PLK1, NR1I2, FOS, NR3C1, HIF1A, ESR1, RELA, ESR2, NR3C2, AR, RXRA, CHEK1, PPARG, TP53	103	1059	20562	3.01614	0.0676819	0.00368807	0.00326388
GOTERM_CC_DIRECT	GO:0090575~RNA polymerase II transcription factor complex	6	5.82524	0.000343119	NCOA2, RXRA, STAT1, PPARG, FOS, HIF1A	103	121	20562	9.89906	0.101847	0.00526117	0.00465605
GOTERM_CC_DIRECT	GO:0043231~intracellular membrane-bounded organelle	15	14.5631	0.000352986	DGAT2, PON1, TYR, PTGS2, MPO, PTK2, ESR2, PTGS1, IGF1R, AXL, CAT, CHEK1, CYP1B1, PPARG, APOB	103	984	20562	3.04316	0.104617	0.00526117	0.00465605
GOTERM_CC_DIRECT	GO:0097136~Bcl-2 family protein complex	3	2.91262	0.000669137	BAX, BCL2L1, MCL1	103	8	20562	74.8617	0.189018	0.00951999	0.00842504
GOTERM_CC_DIRECT	GO:0044294~dendritic growth cone	3	2.91262	0.00106845	HSP90AB1, MAP2, SRC	103	10	20562	59.8893	0.284379	0.0145402	0.0128679
GOTERM_CC_DIRECT	GO:0005876~spindle microtubule	4	3.8835	0.00144562	PLK1, CDK1, CALM1, AURKB	103	45	20562	17.745	0.364159	0.0188533	0.0166849
GOTERM_CC_DIRECT	GO:0005813~centrosome	10	9.70874	0.00161844	GSK3B, CDK6, PLK1, CHEK1, CDK2, CDK1, CALM1, PRKACA, TP53, BCL2L1	103	548	20562	3.6429	0.397689	0.0202628	0.0179323
GOTERM_CC_DIRECT	GO:0031012~extracellular matrix	7	6.79612	0.00188795	MMP12, TGFB1, MMP7, MMP2, MMP3, MMP8, VEGFA	103	260	20562	5.37468	0.446496	0.022728	0.0201139
GOTERM_CC_DIRECT	GO:0030424~axon	8	7.76699	0.00215107	GSK3B, TGFB1, PTPRS, CDK5, STAT1, DYRK1A, MAPT, IGF1R	103	361	20562	4.42396	0.49034	0.0249365	0.0220684
GOTERM_CC_DIRECT	GO:0098978~glutamatergic synapse	8	7.76699	0.00258237	GSK3B, PTPRS, CDK5, SRC, MAPK14, HRAS, RELA, MTOR	103	373	20562	4.28163	0.554843	0.0281693	0.0249294
GOTERM_CC_DIRECT	GO:0070062~extracellular exosome	22	21.3592	0.00262552	PTPRS, ABCB1, MMP7, HSP90AB1, SRC, PON1, AKR1B1, PRKCA, F2, MPO, MMP9, PTGS1, ICAM1, SOD1, DPP4, AXL, FASN, CAT, CDK1, BAX, APOB, PRKACA	103	2218	20562	1.98011	0.56083	0.0281693	0.0249294
GOTERM_CC_DIRECT	GO:0016324~apical plasma membrane	8	7.76699	0.00269993	DPP4, ADAM17, ABCB1, ABCC2, HSP90AB1, ADRB2, EGFR, ABCG2	103	376	20562	4.24747	0.570967	0.0281693	0.0249294
GOTERM_CC_DIRECT	GO:0005764~lysosome	7	6.79612	0.00442415	SRC, CAT, ADRB2, TYR, MPO, MTOR, SOD1	103	309	20562	4.52239	0.750384	0.0446696	0.0395319
GOTERM_CC_DIRECT	GO:0005925~focal adhesion	8	7.76699	0.00526625	DPP4, ADAM17, SRC, CAT, PTK2, EGFR, SLC6A4, ICAM1	103	425	20562	3.75776	0.808466	0.0515105	0.0455859
GOTERM_CC_DIRECT	GO:0016607~nuclear speck	8	7.76699	0.00574616	AR, TERT, DYRK1A, MAPT, MAPK14, NR3C1, PRKACA, HIF1A	103	432	20562	3.69687	0.835317	0.0545015	0.0482329
GOTERM_CC_DIRECT	GO:0005789~endoplasmic reticulum membrane	13	12.6214	0.00595571	DGAT2, PON1, PTGS2, CYP19A1, EGFR, MTOR, PTGS1, NR3C2, CDK1, BAX, CYP1B1, APOB, HRAS	103	1054	20562	2.46224	0.845832	0.0548276	0.0485216
