# Supplementary material for: Mechanism of Smilax china L. in the treatment of intrauterine adhesions based on network pharmacology, molecular docking and experimental validation
Source: BMC Complement Med Ther. 2024 Apr 5;24:150. doi: 10.1186/s12906-024-04414-4 (PMC10996135; doi:10.1186/s12906-024-04414-4)
Supplement: Supplementary file 8 — Supplementary Material 8 [file 12906_2024_4414_MOESM8_ESM.xlsx]

## Sheet: Sheet1
Supplementary Table 8 Information of the top 20 pathways based on KEGG enrichment analysis
NO.	Category	Term	Count	%	PValue	Genes	List Total	Pop Hits	Pop Total	Fold Enrichment	Bonferroni	Benjamini	FDR
1	KEGG_PATHWAY	hsa05200~Pathways in cancer	42	40.7767	4.93591e-25	GSK3B, CDKN1A, HSP90AB1, FLT3, PIK3R1, PTGS2, HIF1A, RELA, EGFR, IGF1R, CASP9, CASP8, RXRA, TERT, CASP3, AKT1, PRKACA, HRAS, TGFB1, NOS2, STAT1, MMP2, PRKCA, FOS, F2, MMP9, ESR1, MTOR, PTK2, ESR2, VEGFA, AR, CDK6, IFNG, KIT, CDK2, BAX, PPARG, CALM1, MET, TP53, BCL2L1	93	531	8164	6.94344	1.24385e-22	1.24385e-22	5.47886e-23
2	KEGG_PATHWAY	hsa04151~PI3K-Akt signaling pathway	26	25.2427	5.65921e-14	GSK3B, CDKN1A, HSP90AB1, FLT3, PIK3R1, RELA, EGFR, PIK3CG, IGF1R, CASP9, RXRA, KDR, AKT1, HRAS, MCL1, PRKCA, MTOR, PTK2, VEGFA, CDK6, KIT, CDK2, PKN1, MET, TP53, BCL2L1	93	354	8164	6.44748	1.42686e-11	2.03732e-12	8.97389e-13
3	KEGG_PATHWAY	hsa05417~Lipid and atherosclerosis	25	24.2718	5.39497e-18	GSK3B, HSP90AB1, SRC, PIK3R1, RELA, ICAM1, CASP9, CASP8, RXRA, CASP3, AKT1, APOB, HRAS, MMP3, PRKCA, FOS, MAPK14, MMP9, PTK2, TNFRSF1A, BAX, PPARG, CALM1, TP53, BCL2L1	93	215	8164	10.2076	1.35953e-15	6.36662e-16	2.80434e-16
4	KEGG_PATHWAY	hsa05167~Kaposi sarcoma-associated herpesvirus infection	24	23.301	7.57931e-18	GSK3B, CDKN1A, STAT1, SRC, PIK3R1, FOS, PTGS2, MAPK14, HIF1A, MTOR, PIK3CG, RELA, ICAM1, TNFRSF1A, VEGFA, CASP9, CASP8, CDK6, CASP3, BAX, AKT1, CALM1, HRAS, TP53	93	194	8164	10.86	1.90999e-15	6.36662e-16	2.80434e-16
5	KEGG_PATHWAY	hsa05163~Human cytomegalovirus infection	23	22.3301	2.92825e-15	GSK3B, CDKN1A, SRC, PRKCA, PIK3R1, PTGS2, MAPK14, EGFR, MTOR, RELA, PTK2, TNFRSF1A, VEGFA, CASP9, CASP8, CDK6, CASP3, BAX, AKT1, CALM1, PRKACA, HRAS, TP53	93	225	8164	8.97357	7.27418e-13	1.47584e-13	6.50072e-14
6	KEGG_PATHWAY	hsa05205~Proteoglycans in cancer	22	21.3592	5.41548e-15	CDKN1A, TGFB1, SRC, MMP2, PRKCA, PIK3R1, MAPK14, HIF1A, ESR1, MMP9, EGFR, MTOR, PTK2, IGF1R, VEGFA, CASP3, KDR, AKT1, PRKACA, HRAS, MET, TP53	93	205	8164	9.42082	1.3709e-12	2.2745e-13	1.00186e-13
7	KEGG_PATHWAY	hsa05165~Human papillomavirus infection	21	20.3883	4.74791e-10	GSK3B, CDKN1A, STAT1, PIK3R1, PTGS2, EGFR, MTOR, RELA, PTK2, TNFRSF1A, VEGFA, CASP8, CDK6, TERT, CASP3, CDK2, BAX, AKT1, PRKACA, HRAS, TP53	93	331	8164	5.56944	1.19647e-07	4.98531e-09	2.19591e-09
8	KEGG_PATHWAY	hsa05022~Pathways of neurodegeneration - multiple diseases	21	20.3883	2.28185e-07	GSK3B, NOS2, CSNK2A1, CHRNA7, PRKCA, PTGS2, MAPK14, MTOR, RELA, SOD1, TNFRSF1A, CASP9, CASP8, CDK5, CASP3, CAT, BAX, MAPT, CALM1, HRAS, BCL2L1	93	476	8164	3.87287	5.75011e-05	1.05827e-06	4.66141e-07
9	KEGG_PATHWAY	hsa05207~Chemical carcinogenesis - receptor activation	19	18.4466	1.51242e-11	HSP90AB1, SRC, CHRNA7, PRKCA, PIK3R1, FOS, ADRB2, ESR1, EGFR, MTOR, RELA, ESR2, VEGFA, AR, RXRA, CYP1B1, AKT1, PRKACA, HRAS	93	212	8164	7.86752	3.81128e-09	2.54086e-10	1.11919e-10
10	KEGG_PATHWAY	hsa04010~MAPK signaling pathway	19	18.4466	3.26034e-09	TGFB1, FLT3, PRKCA, FOS, MAPK14, EGFR, RELA, IGF1R, TNFRSF1A, VEGFA, CASP3, KIT, KDR, AKT1, MAPT, PRKACA, HRAS, MET, TP53	93	294	8164	5.67318	8.21605e-07	2.65034e-08	1.16741e-08
11	KEGG_PATHWAY	hsa01522~Endocrine resistance	18	17.4757	3.45281e-16	CDKN1A, SRC, MMP2, PIK3R1, FOS, MAPK14, ESR1, MMP9, EGFR, MTOR, PTK2, ESR2, IGF1R, BAX, AKT1, PRKACA, HRAS, TP53	93	98	8164	16.1238	8.39329e-14	2.17527e-14	9.58153e-15
12	KEGG_PATHWAY	hsa05160~Hepatitis C	18	17.4757	1.14796e-12	GSK3B, CDKN1A, STAT1, PIK3R1, EGFR, RELA, TNFRSF1A, CASP9, CASP8, RXRA, CDK6, IFNG, CASP3, CDK2, BAX, AKT1, HRAS, TP53	93	157	8164	10.0645	2.89289e-10	2.71955e-11	1.1979e-11
13	KEGG_PATHWAY	hsa05161~Hepatitis B	18	17.4757	1.92601e-12	CDKN1A, TGFB1, STAT1, SRC, PRKCA, PIK3R1, FOS, MAPK14, MMP9, RELA, CASP9, CASP8, CASP3, CDK2, BAX, AKT1, HRAS, TP53	93	162	8164	9.75388	4.85356e-10	3.7335e-11	1.64452e-11
14	KEGG_PATHWAY	hsa05170~Human immunodeficiency virus 1 infection	18	17.4757	1.47804e-10	PRKCA, PIK3R1, FOS, MAPK14, MTOR, RELA, PTK2, TNFRSF1A, CASP9, CASP8, CASP3, CHEK1, CDK1, BAX, AKT1, CALM1, HRAS, BCL2L1	93	212	8164	7.45344	3.72467e-08	2.06398e-09	9.09132e-10
15	KEGG_PATHWAY	hsa05010~Alzheimer disease	18	17.4757	1.04117e-06	GSK3B, NOS2, CSNK2A1, CHRNA7, PIK3R1, PTGS2, MTOR, RELA, TNFRSF1A, CASP9, ADAM17, CASP8, CDK5, CASP3, AKT1, MAPT, CALM1, HRAS	93	384	8164	4.11492	0.000262342	4.1647e-06	1.83445e-06
16	KEGG_PATHWAY	hsa05418~Fluid shear stress and atherosclerosis	17	16.5049	2.18654e-12	HSP90AB1, SRC, MMP2, PIK3R1, FOS, MAPK14, MMP9, RELA, PTK2, ICAM1, TNFRSF1A, VEGFA, IFNG, KDR, AKT1, CALM1, TP53	93	139	8164	10.7363	5.51019e-10	3.93577e-11	1.73361e-11
17	KEGG_PATHWAY	hsa05166~Human T-cell leukemia virus 1 infection	17	16.5049	2.63181e-09	CDKN1A, TGFB1, MMP7, PIK3R1, FOS, RELA, ICAM1, TNFRSF1A, TERT, CHEK1, CDK2, BAX, AKT1, PRKACA, HRAS, TP53, BCL2L1	93	222	8164	6.72227	6.63216e-07	2.21072e-08	9.7377e-09
18	KEGG_PATHWAY	hsa05206~MicroRNAs in cancer	17	16.5049	2.9237e-07	CDKN1A, DNMT1, ABCB1, PRKCA, PIK3R1, PTGS2, MMP9, EGFR, MTOR, VEGFA, CDK6, CASP3, CYP1B1, HRAS, MET, TP53, MCL1	93	310	8164	4.81401	7.36745e-05	1.31566e-06	5.79518e-07
19	KEGG_PATHWAY	hsa05215~Prostate cancer	16	15.534	1.354e-13	GSK3B, CDKN1A, HSP90AB1, MMP3, PIK3R1, MMP9, EGFR, MTOR, RELA, IGF1R, CASP9, AR, CDK2, AKT1, HRAS, TP53	93	97	8164	14.48	3.41327e-11	3.79121e-12	1.66994e-12
20	KEGG_PATHWAY	hsa05225~Hepatocellular carcinoma	16	15.534	4.45285e-10	GSK3B, CDKN1A, TGFB1, PRKCA, PIK3R1, EGFR, MTOR, IGF1R, CDK6, TERT, BAX, AKT1, HRAS, MET, TP53, BCL2L1	93	168	8164	8.36047	1.12212e-07	4.87878e-09	2.14899e-09
21	KEGG_PATHWAY	hsa05208~Chemical carcinogenesis - reactive oxygen species	16	15.534	2.23148e-08	PTPN1, SRC, PIK3R1, FOS, MAPK14, HIF1A, EGFR, RELA, PTK2, SOD1, VEGFA, CAT, CYP1B1, AKT1, HRAS, MET	93	223	8164	6.29847	5.62331e-06	1.47982e-07	6.51827e-08
22	KEGG_PATHWAY	hsa04014~Ras signaling pathway	16	15.534	4.76869e-08	PLA2G1B, FLT3, PRKCA, PIK3R1, EGFR, RELA, IGF1R, VEGFA, KIT, KDR, AKT1, CALM1, PRKACA, HRAS, MET, BCL2L1	93	236	8164	5.95152	1.2017e-05	2.86121e-07	1.2603e-07
23	KEGG_PATHWAY	hsa01521~EGFR tyrosine kinase inhibitor resistance	15	14.5631	1.31824e-13	GSK3B, SRC, PRKCA, PIK3R1, EGFR, MTOR, IGF1R, VEGFA, AXL, KDR, BAX, AKT1, HRAS, MET, BCL2L1	93	79	8164	16.668	3.32094e-11	3.79121e-12	1.66994e-12
24	KEGG_PATHWAY	hsa05222~Small cell lung cancer	15	14.5631	1.1871e-12	CDKN1A, NOS2, PIK3R1, PTGS2, RELA, PTK2, CASP9, RXRA, CDK6, CASP3, CDK2, BAX, AKT1, TP53, BCL2L1	93	92	8164	14.3128	2.99137e-10	2.71955e-11	1.1979e-11
25	KEGG_PATHWAY	hsa04919~Thyroid hormone signaling pathway	15	14.5631	5.48872e-11	NCOA2, GSK3B, STAT1, SRC, PRKCA, PIK3R1, HIF1A, ESR1, MTOR, CASP9, RXRA, AKT1, PRKACA, HRAS, TP53	93	121	8164	10.8824	1.38316e-08	8.64473e-10	3.8078e-10
26	KEGG_PATHWAY	hsa04926~Relaxin signaling pathway	15	14.5631	1.31569e-10	TGFB1, NOS2, SRC, MMP2, PRKCA, PIK3R1, FOS, MAPK14, MMP9, EGFR, RELA, VEGFA, AKT1, PRKACA, HRAS	93	129	8164	10.2076	3.31553e-08	1.95031e-09	8.59065e-10
27	KEGG_PATHWAY	hsa05162~Measles	15	14.5631	3.60947e-10	GSK3B, CSNK2A1, STAT1, PIK3R1, FOS, RELA, CASP9, CASP8, CDK6, CASP3, CDK2, BAX, AKT1, TP53, BCL2L1	93	139	8164	9.4732	9.09586e-08	4.13448e-09	1.82114e-09
28	KEGG_PATHWAY	hsa05224~Breast cancer	15	14.5631	7.63375e-10	GSK3B, CDKN1A, PIK3R1, FOS, ESR1, EGFR, MTOR, ESR2, IGF1R, CDK6, KIT, BAX, AKT1, HRAS, TP53	93	147	8164	8.95765	1.9237e-07	7.39886e-09	3.25902e-09
29	KEGG_PATHWAY	hsa05226~Gastric cancer	15	14.5631	9.13858e-10	GSK3B, CDKN1A, TGFB1, ABCB1, PIK3R1, EGFR, MTOR, RXRA, TERT, CDK2, BAX, AKT1, HRAS, MET, TP53	93	149	8164	8.83741	2.30292e-07	8.17388e-09	3.6004e-09
30	KEGG_PATHWAY	hsa05152~Tuberculosis	15	14.5631	1.08732e-08	IL10, TGFB1, NOS2, STAT1, SRC, MAPK14, RELA, TNFRSF1A, CASP9, CASP8, IFNG, CASP3, BAX, AKT1, CALM1	93	180	8164	7.31541	2.74004e-06	7.61123e-08	3.35257e-08
31	KEGG_PATHWAY	hsa05212~Pancreatic cancer	14	13.5922	1.69272e-12	CDKN1A, TGFB1, STAT1, PIK3R1, EGFR, MTOR, RELA, VEGFA, CASP9, CDK6, BAX, AKT1, TP53, BCL2L1	93	76	8164	16.1709	4.26575e-10	3.55472e-11	1.56577e-11
32	KEGG_PATHWAY	hsa05145~Toxoplasmosis	14	13.5922	2.71489e-10	IL10, TGFB1, NOS2, STAT1, MAPK14, PIK3CG, RELA, TNFRSF1A, CASP9, CASP8, IFNG, CASP3, AKT1, BCL2L1	93	112	8164	10.9731	6.84152e-08	3.42076e-09	1.50676e-09
33	KEGG_PATHWAY	hsa04915~Estrogen signaling pathway	14	13.5922	3.72106e-09	NCOA2, HSP90AB1, SRC, MMP2, PIK3R1, FOS, ESR1, MMP9, EGFR, ESR2, AKT1, CALM1, PRKACA, HRAS	93	138	8164	8.90572	9.37707e-07	2.84154e-08	1.25163e-08
34	KEGG_PATHWAY	hsa04218~Cellular senescence	14	13.5922	1.66581e-08	CDKN1A, TGFB1, PIK3R1, MAPK14, MTOR, RELA, CDK6, CHEK1, CDK2, CDK1, AKT1, CALM1, HRAS, TP53	93	156	8164	7.87814	4.19784e-06	1.13455e-07	4.99744e-08
35	KEGG_PATHWAY	hsa05202~Transcriptional misregulation in cancer	14	13.5922	2.09053e-07	CDKN1A, FLT3, MMP3, MPO, MMP9, RELA, PTK2, IGF1R, RXRA, BAX, PPARG, MET, TP53, BCL2L1	93	193	8164	6.36782	5.26799e-05	1.02869e-06	4.53112e-07
36	KEGG_PATHWAY	hsa05169~Epstein-Barr virus infection	14	13.5922	3.54816e-07	CDKN1A, STAT1, PIK3R1, MAPK14, RELA, ICAM1, CASP9, CASP8, CDK6, CASP3, CDK2, BAX, AKT1, TP53	93	202	8164	6.08411	8.94096e-05	1.54161e-06	6.79044e-07
37	KEGG_PATHWAY	hsa05203~Viral carcinogenesis	14	13.5922	3.97555e-07	CDKN1A, SRC, PIK3R1, RELA, CASP8, CDK6, CASP3, CHEK1, CDK2, CDK1, BAX, PRKACA, HRAS, TP53	93	204	8164	6.02446	0.000100179	1.68819e-06	7.43608e-07
38	KEGG_PATHWAY	hsa05168~Herpes simplex virus 1 infection	14	13.5922	0.00347489	STAT1, SRC, PIK3R1, MTOR, RELA, TNFRSF1A, CASP9, CASP8, IFNG, CASP3, BAX, AKT1, TP53, BCL2L1	93	495	8164	2.48281	0.584053	0.00761455	0.00347489
39	KEGG_PATHWAY	hsa05210~Colorectal cancer	13	12.6214	1.55617e-10	GSK3B, CDKN1A, TGFB1, PIK3R1, FOS, EGFR, MTOR, CASP9, CASP3, BAX, AKT1, HRAS, TP53	93	86	8164	13.2698	3.92155e-08	2.06398e-09	9.09132e-10
40	KEGG_PATHWAY	hsa04933~AGE-RAGE signaling pathway in diabetic complications	13	12.6214	9.40645e-10	TGFB1, STAT1, MMP2, PRKCA, PIK3R1, MAPK14, RELA, ICAM1, VEGFA, CASP3, BAX, AKT1, HRAS	93	100	8164	11.412	2.37043e-07	8.17388e-09	3.6004e-09
41	KEGG_PATHWAY	hsa04210~Apoptosis	13	12.6214	3.26676e-08	PIK3R1, FOS, RELA, TNFRSF1A, CASP9, CASP8, CASP3, BAX, AKT1, HRAS, TP53, MCL1, BCL2L1	93	136	8164	8.39121	8.23221e-06	2.05806e-07	9.06527e-08
42	KEGG_PATHWAY	hsa04932~Non-alcoholic fatty liver disease	13	12.6214	1.40374e-07	GSK3B, TGFB1, PIK3R1, FOS, MAPK14, RELA, TNFRSF1A, CASP8, RXRA, CASP3, BAX, AKT1, PPARG	93	155	8164	7.36261	3.53736e-05	7.36964e-07	3.24615e-07
43	KEGG_PATHWAY	hsa05164~Influenza A	13	12.6214	4.10847e-07	STAT1, PRKCA, PIK3R1, RELA, ICAM1, TNFRSF1A, CASP9, CASP8, CDK6, IFNG, CASP3, BAX, AKT1	93	171	8164	6.67371	0.000103528	1.69727e-06	7.47606e-07
44	KEGG_PATHWAY	hsa04015~Rap1 signaling pathway	13	12.6214	3.6412e-06	SRC, PRKCA, PIK3R1, MAPK14, EGFR, IGF1R, VEGFA, KIT, KDR, AKT1, CALM1, HRAS, MET	93	210	8164	5.43431	0.000917164	1.36953e-05	6.03244e-06
45	KEGG_PATHWAY	hsa05131~Shigellosis	13	12.6214	1.90684e-05	GSK3B, SRC, PIK3R1, MAPK14, EGFR, MTOR, RELA, PTK2, TNFRSF1A, BAX, AKT1, TP53, BCL2L1	93	247	8164	4.62026	0.00479376	6.32269e-05	2.785e-05
46	KEGG_PATHWAY	hsa05223~Non-small cell lung cancer	12	11.6505	3.47671e-10	CASP9, CDKN1A, RXRA, CDK6, BAX, AKT1, PRKCA, PIK3R1, HRAS, TP53, MET, EGFR	93	72	8164	14.6308	8.76131e-08	4.13448e-09	1.82114e-09
47	KEGG_PATHWAY	hsa05214~Glioma	12	11.6505	5.48174e-10	CDKN1A, CDK6, BAX, AKT1, PRKCA, PIK3R1, CALM1, HRAS, TP53, EGFR, MTOR, IGF1R	93	75	8164	14.0456	1.3814e-07	5.5256e-09	2.43389e-09
48	KEGG_PATHWAY	hsa05235~PD-L1 expression and PD-1 checkpoint pathway in cancer	12	11.6505	3.59419e-09	CSNK2A1, IFNG, STAT1, AKT1, FOS, PIK3R1, MAPK14, HRAS, HIF1A, RELA, EGFR, MTOR	93	89	8164	11.8362	9.05736e-07	2.83043e-08	1.24674e-08
49	KEGG_PATHWAY	hsa04066~HIF-1 signaling pathway	12	11.6505	3.14267e-08	CDKN1A, IFNG, NOS2, AKT1, PRKCA, PIK3R1, HIF1A, RELA, EGFR, MTOR, IGF1R, VEGFA	93	109	8164	9.6644	7.91949e-06	2.03065e-07	8.94451e-08
50	KEGG_PATHWAY	hsa04668~TNF signaling pathway	12	11.6505	4.18122e-08	CASP8, CASP3, MMP3, AKT1, FOS, PIK3R1, MAPK14, PTGS2, MMP9, RELA, ICAM1, TNFRSF1A	93	112	8164	9.40553	1.05366e-05	2.56992e-07	1.13199e-07
51	KEGG_PATHWAY	hsa04068~FoxO signaling pathway	12	11.6505	2.12269e-07	IL10, CDKN1A, TGFB1, PLK1, CDK2, CAT, AKT1, PIK3R1, MAPK14, HRAS, EGFR, IGF1R	93	131	8164	8.04137	5.34903e-05	1.02869e-06	4.53112e-07
52	KEGG_PATHWAY	hsa04510~Focal adhesion	12	11.6505	1.44086e-05	GSK3B, SRC, KDR, AKT1, PRKCA, PIK3R1, HRAS, MET, PTK2, EGFR, IGF1R, VEGFA	93	201	8164	5.24089	0.00362442	4.90673e-05	2.1613e-05
53	KEGG_PATHWAY	hsa05132~Salmonella infection	12	11.6505	0.000103057	CASP8, HSP90AB1, CASP3, BAX, AKT1, FOS, PKN1, MAPK14, HRAS, RELA, PIK3CG, TNFRSF1A	93	249	8164	4.2306	0.0256372	0.000291801	0.000128531
54	KEGG_PATHWAY	hsa04370~VEGF signaling pathway	11	10.6796	8.01044e-10	CASP9, SRC, KDR, AKT1, PRKCA, PIK3R1, MAPK14, PTGS2, HRAS, PTK2, VEGFA	93	59	8164	16.3667	2.01863e-07	7.47641e-09	3.29318e-09
55	KEGG_PATHWAY	hsa04917~Prolactin signaling pathway	11	10.6796	4.57105e-09	GSK3B, STAT1, SRC, AKT1, FOS, PIK3R1, MAPK14, HRAS, ESR1, RELA, ESR2	93	70	8164	13.7948	1.1519e-06	3.38796e-08	1.49231e-08
56	KEGG_PATHWAY	hsa04115~p53 signaling pathway	11	10.6796	6.96432e-09	CASP9, CDKN1A, CASP8, CDK6, CASP3, CHEK1, CDK2, CDK1, BAX, TP53, BCL2L1	93	73	8164	13.2279	1.75501e-06	5.01431e-08	2.20868e-08
57	KEGG_PATHWAY	hsa04211~Longevity regulating pathway	11	10.6796	4.91919e-08	CAT, BAX, AKT1, PPARG, PIK3R1, PRKACA, HRAS, TP53, RELA, MTOR, IGF1R	93	89	8164	10.8498	1.23963e-05	2.88287e-07	1.26984e-07
58	KEGG_PATHWAY	hsa04657~IL-17 signaling pathway	11	10.6796	8.3529e-08	GSK3B, CASP8, HSP90AB1, IFNG, CASP3, MMP3, FOS, MAPK14, PTGS2, MMP9, RELA	93	94	8164	10.2727	2.10491e-05	4.67763e-07	2.06038e-07
59	KEGG_PATHWAY	hsa05142~Chagas disease	11	10.6796	1.82815e-07	IL10, TGFB1, CASP8, IFNG, NOS2, AKT1, FOS, PIK3R1, MAPK14, RELA, TNFRSF1A	93	102	8164	9.467	4.60684e-05	9.2139e-07	4.0585e-07
60	KEGG_PATHWAY	hsa04625~C-type lectin receptor signaling pathway	11	10.6796	2.19924e-07	IL10, CASP8, STAT1, SRC, AKT1, PIK3R1, CALM1, MAPK14, PTGS2, HRAS, RELA	93	104	8164	9.28495	5.54194e-05	1.04568e-06	4.60596e-07
61	KEGG_PATHWAY	hsa04935~Growth hormone synthesis, secretion and action	11	10.6796	8.43963e-07	GSK3B, STAT1, AKT1, PRKCA, FOS, PIK3R1, MAPK14, PRKACA, HRAS, PTK2, MTOR	93	120	8164	8.04695	0.000212656	3.4303e-06	1.51097e-06
62	KEGG_PATHWAY	hsa04630~JAK-STAT signaling pathway	11	10.6796	1.27591e-05	IL10, CDKN1A, IFNG, STAT1, AKT1, PIK3R1, HRAS, EGFR, MTOR, BCL2L1, MCL1	93	162	8164	5.96071	0.00321015	4.40452e-05	1.94008e-05
63	KEGG_PATHWAY	hsa04062~Chemokine signaling pathway	11	10.6796	5.53478e-05	GSK3B, CXCR1, STAT1, SRC, AKT1, PIK3R1, PRKACA, HRAS, RELA, PTK2, PIK3CG	93	192	8164	5.02935	0.0138512	0.000162182	7.14373e-05
64	KEGG_PATHWAY	hsa05171~Coronavirus disease - COVID-19	11	10.6796	0.00026475	ADAM17, STAT1, MMP3, PRKCA, FOS, PIK3R1, F2, MAPK14, RELA, EGFR, TNFRSF1A	93	232	8164	4.16222	0.0645483	0.000709755	0.00031263
65	KEGG_PATHWAY	hsa05014~Amyotrophic lateral sclerosis	11	10.6796	0.00761618	CASP9, NOS2, CASP3, CAT, BAX, MAPK14, TP53, MTOR, BCL2L1, SOD1, TNFRSF1A	93	364	8164	2.65284	0.854361	0.0149944	0.00761618
66	KEGG_PATHWAY	hsa05230~Central carbon metabolism in cancer	10	9.70874	7.28942e-08	FLT3, KIT, AKT1, PIK3R1, HRAS, HIF1A, TP53, MET, EGFR, MTOR	93	70	8164	12.5407	1.83692e-05	4.17485e-07	1.83892e-07
67	KEGG_PATHWAY	hsa05218~Melanoma	10	9.70874	9.36596e-08	CDKN1A, CDK6, BAX, AKT1, PIK3R1, HRAS, TP53, MET, EGFR, IGF1R	93	72	8164	12.1924	2.36019e-05	5.13092e-07	2.26005e-07
68	KEGG_PATHWAY	hsa01524~Platinum drug resistance	10	9.70874	1.05851e-07	CASP9, CDKN1A, CASP8, ABCC2, CASP3, BAX, AKT1, PIK3R1, TP53, BCL2L1	93	73	8164	12.0253	2.66741e-05	5.67542e-07	2.49989e-07
69	KEGG_PATHWAY	hsa05220~Chronic myeloid leukemia	10	9.70874	1.51102e-07	CDKN1A, TGFB1, CDK6, BAX, AKT1, PIK3R1, HRAS, TP53, RELA, BCL2L1	93	76	8164	11.5507	3.8077e-05	7.77097e-07	3.42293e-07
70	KEGG_PATHWAY	hsa04012~ErbB signaling pathway	10	9.70874	4.0195e-07	GSK3B, CDKN1A, SRC, AKT1, PRKCA, PIK3R1, HRAS, PTK2, EGFR, MTOR	93	85	8164	10.3276	0.000101286	1.68819e-06	7.43608e-07
71	KEGG_PATHWAY	hsa05146~Amoebiasis	10	9.70874	1.91192e-06	IL10, TGFB1, IFNG, NOS2, CASP3, PRKCA, PIK3R1, PRKACA, RELA, PTK2	93	102	8164	8.60637	0.000481688	7.52818e-06	3.31599e-06
72	KEGG_PATHWAY	hsa04659~Th17 cell differentiation	10	9.70874	3.08948e-06	RXRA, TGFB1, HSP90AB1, IFNG, STAT1, FOS, MAPK14, HIF1A, RELA, MTOR	93	108	8164	8.12824	0.000778248	1.17962e-05	5.19595e-06
73	KEGG_PATHWAY	hsa04380~Osteoclast differentiation	10	9.70874	1.25237e-05	TGFB1, IFNG, STAT1, AKT1, PPARG, FOS, PIK3R1, MAPK14, RELA, TNFRSF1A	93	128	8164	6.8582	0.00315103	4.38331e-05	1.93074e-05
74	KEGG_PATHWAY	hsa05135~Yersinia infection	10	9.70874	2.16628e-05	IL10, GSK3B, SRC, AKT1, FOS, PKN1, PIK3R1, MAPK14, RELA, PTK2	93	137	8164	6.40766	0.0054442	6.99874e-05	3.08278e-05
75	KEGG_PATHWAY	hsa04072~Phospholipase D signaling pathway	10	9.70874	4.00334e-05	CXCR1, KIT, AKT1, PRKCA, PIK3R1, F2, HRAS, EGFR, MTOR, PIK3CG	93	148	8164	5.93142	0.0100379	0.000124548	5.48605e-05
76	KEGG_PATHWAY	hsa04921~Oxytocin signaling pathway	10	9.70874	5.47057e-05	CDKN1A, SRC, PRKCA, FOS, CALM1, PRKACA, PTGS2, HRAS, EGFR, PIK3CG	93	154	8164	5.70032	0.0136916	0.000162182	7.14373e-05
77	KEGG_PATHWAY	hsa05130~Pathogenic Escherichia coli infection	10	9.70874	0.000356063	CASP9, CASP8, SRC, CASP3, BAX, FOS, F2, MAPK14, RELA, TNFRSF1A	93	197	8164	4.45609	0.0858348	0.000944505	0.000416032
78	KEGG_PATHWAY	hsa05415~Diabetic cardiomyopathy	10	9.70874	0.000443843	GSK3B, TGFB1, MMP2, AKT1, PRKCA, PIK3R1, MAPK14, MMP9, RELA, MTOR	93	203	8164	4.32438	0.105842	0.00116509	0.000513194
79	KEGG_PATHWAY	hsa04020~Calcium signaling pathway	10	9.70874	0.00146572	NOS2, CHRNA7, KDR, PRKCA, ADRB2, CALM1, PRKACA, MET, EGFR, VEGFA	93	240	8164	3.65771	0.309012	0.00345197	0.00152051
80	KEGG_PATHWAY	hsa05213~Endometrial cancer	9	8.73786	2.30971e-07	CASP9, GSK3B, CDKN1A, BAX, AKT1, PIK3R1, HRAS, TP53, EGFR	93	58	8164	13.6218	5.82029e-05	1.05827e-06	4.66141e-07
81	KEGG_PATHWAY	hsa05140~Leishmaniasis	9	8.73786	2.12928e-06	IL10, TGFB1, IFNG, NOS2, STAT1, FOS, MAPK14, PTGS2, RELA	93	77	8164	10.2606	0.000536435	8.25505e-06	3.63615e-06
82	KEGG_PATHWAY	hsa04914~Progesterone-mediated oocyte maturation	9	8.73786	1.76374e-05	HSP90AB1, PLK1, CDK2, CDK1, AKT1, PIK3R1, MAPK14, PRKACA, IGF1R	93	102	8164	7.74573	0.00443481	5.92618e-05	2.61034e-05
83	KEGG_PATHWAY	hsa04660~T cell receptor signaling pathway	9	8.73786	2.03393e-05	IL10, GSK3B, IFNG, AKT1, FOS, PIK3R1, MAPK14, HRAS, RELA	93	104	8164	7.59677	0.00511243	6.65648e-05	2.93202e-05
84	KEGG_PATHWAY	hsa04725~Cholinergic synapse	9	8.73786	3.72027e-05	ACHE, CHRNA7, AKT1, PRKCA, FOS, PIK3R1, PRKACA, HRAS, PIK3CG	93	113	8164	6.99172	0.00933145	0.000117189	5.16188e-05
85	KEGG_PATHWAY	hsa04722~Neurotrophin signaling pathway	9	8.73786	5.39604e-05	GSK3B, BAX, AKT1, PIK3R1, CALM1, MAPK14, HRAS, TP53, RELA	93	119	8164	6.6392	0.0135064	0.000161881	7.13048e-05
86	KEGG_PATHWAY	hsa04071~Sphingolipid signaling pathway	9	8.73786	5.39604e-05	BAX, AKT1, PRKCA, PIK3R1, MAPK14, HRAS, TP53, RELA, TNFRSF1A	93	119	8164	6.6392	0.0135064	0.000161881	7.13048e-05
87	KEGG_PATHWAY	hsa04110~Cell cycle	9	8.73786	8.10371e-05	GSK3B, CDKN1A, TGFB1, CDK6, PLK1, CHEK1, CDK2, CDK1, TP53	93	126	8164	6.27035	0.0202151	0.000232061	0.000102217
88	KEGG_PATHWAY	hsa04910~Insulin signaling pathway	9	8.73786	0.000145785	GSK3B, PTPN1, FASN, AKT1, PIK3R1, CALM1, PRKACA, HRAS, MTOR	93	137	8164	5.76689	0.0360737	0.000403712	0.000177825
89	KEGG_PATHWAY	hsa05012~Parkinson disease	9	8.73786	0.0100245	CASP9, CASP3, BAX, MAPT, CALM1, PRKACA, TP53, BCL2L1, SOD1	93	266	8164	2.97017	0.921049	0.0194322	0.0100245
90	KEGG_PATHWAY	hsa05020~Prion disease	9	8.73786	0.0116101	CASP9, GSK3B, CSNK2A1, CASP3, BAX, PIK3R1, MAPK14, PRKACA, SOD1	93	273	8164	2.89401	0.947286	0.0221853	0.0116101
91	KEGG_PATHWAY	hsa05219~Bladder cancer	8	7.76699	3.01599e-07	CDKN1A, SRC, MMP2, HRAS, TP53, MMP9, EGFR, VEGFA	93	41	8164	17.1288	7.60001e-05	1.33338e-06	5.87324e-07
92	KEGG_PATHWAY	hsa04213~Longevity regulating pathway - multiple species	8	7.76699	5.44508e-06	CAT, AKT1, PIK3R1, PRKACA, HRAS, MTOR, SOD1, IGF1R	93	62	8164	11.3271	0.00137122	2.01788e-05	8.88829e-06
93	KEGG_PATHWAY	hsa05221~Acute myeloid leukemia	8	7.76699	9.19867e-06	FLT3, KIT, AKT1, PIK3R1, MPO, HRAS, RELA, MTOR	93	67	8164	10.4818	0.00231539	3.35951e-05	1.47979e-05
94	KEGG_PATHWAY	hsa05211~Renal cell carcinoma	8	7.76699	1.12054e-05	CDKN1A, TGFB1, AKT1, PIK3R1, HRAS, HIF1A, MET, VEGFA	93	69	8164	10.178	0.0028198	4.03395e-05	1.77686e-05
95	KEGG_PATHWAY	hsa05120~Epithelial cell signaling in Helicobacter pylori infection	8	7.76699	1.23373e-05	ADAM17, CXCR1, SRC, CASP3, MAPK14, MET, RELA, EGFR	93	70	8164	10.0326	0.00310418	4.37886e-05	1.92878e-05
96	KEGG_PATHWAY	hsa04912~GnRH signaling pathway	8	7.76699	7.90375e-05	SRC, MMP2, PRKCA, CALM1, MAPK14, PRKACA, HRAS, EGFR	93	93	8164	7.55139	0.0197212	0.000228936	0.000100841
97	KEGG_PATHWAY	hsa05231~Choline metabolism in cancer	8	7.76699	0.000110275	AKT1, PRKCA, FOS, PIK3R1, HRAS, HIF1A, EGFR, MTOR	93	98	8164	7.16612	0.0274082	0.00030877	0.000136006
98	KEGG_PATHWAY	hsa04611~Platelet activation	8	7.76699	0.000473494	SRC, AKT1, PIK3R1, F2, MAPK14, PRKACA, PIK3CG, PTGS1	93	124	8164	5.66354	0.112502	0.00121756	0.000536304
99	KEGG_PATHWAY	hsa04114~Oocyte meiosis	8	7.76699	0.000658679	AR, PLK1, CDK2, CDK1, CALM1, MAPK14, PRKACA, IGF1R	93	131	8164	5.36091	0.152989	0.00167664	0.000738519
100	KEGG_PATHWAY	hsa04140~Autophagy - animal	8	7.76699	0.00101842	AKT1, PIK3R1, PRKACA, HRAS, HIF1A, MTOR, BCL2L1, IGF1R	93	141	8164	4.98071	0.226455	0.002541	0.00111925
101	KEGG_PATHWAY	hsa04936~Alcoholic liver disease	8	7.76699	0.00106153	GSK3B, CASP8, FASN, CASP3, AKT1, MAPK14, RELA, TNFRSF1A	93	142	8164	4.94563	0.234823	0.00262261	0.0011552
102	KEGG_PATHWAY	hsa04261~Adrenergic signaling in cardiomyocytes	8	7.76699	0.00146058	AKT1, PRKCA, ADRB2, SCN5A, CALM1, MAPK14, PRKACA, PIK3CG	93	150	8164	4.68186	0.308114	0.00345197	0.00152051
103	KEGG_PATHWAY	hsa04150~mTOR signaling pathway	8	7.76699	0.00183024	GSK3B, AKT1, PRKCA, PIK3R1, HRAS, MTOR, IGF1R, TNFRSF1A	93	156	8164	4.50179	0.369753	0.00419292	0.00184688
104	KEGG_PATHWAY	hsa04360~Axon guidance	8	7.76699	0.00433862	GSK3B, CDK5, SRC, PRKCA, PIK3R1, HRAS, MET, PTK2	93	182	8164	3.85868	0.665698	0.00926553	0.00433862
105	KEGG_PATHWAY	hsa04613~Neutrophil extracellular trap formation	8	7.76699	0.00548082	SRC, AKT1, PRKCA, PIK3R1, MAPK14, MPO, RELA, MTOR	93	190	8164	3.69621	0.749668	0.0114146	0.00548082
106	KEGG_PATHWAY	hsa04024~cAMP signaling pathway	8	7.76699	0.0121231	PDE3A, AKT1, FOS, ADRB2, PIK3R1, CALM1, PRKACA, RELA	93	221	8164	3.17774	0.95375	0.0229701	0.0121231
107	KEGG_PATHWAY	hsa04137~Mitophagy - animal	7	6.79612	0.000149361	CSNK2A1, SRC, HRAS, HIF1A, TP53, RELA, BCL2L1	93	72	8164	8.53465	0.0369422	0.00040912	0.000180208
108	KEGG_PATHWAY	hsa05133~Pertussis	7	6.79612	0.000201591	IL10, NOS2, CASP3, FOS, CALM1, MAPK14, RELA	93	76	8164	8.08546	0.0495371	0.000546248	0.000240609
109	KEGG_PATHWAY	hsa04916~Melanogenesis	7	6.79612	0.000933129	GSK3B, KIT, PRKCA, CALM1, TYR, PRKACA, HRAS	93	101	8164	6.08411	0.209633	0.00235149	0.00103577
110	KEGG_PATHWAY	hsa04620~Toll-like receptor signaling pathway	7	6.79612	0.00108752	CASP8, STAT1, AKT1, FOS, PIK3R1, MAPK14, RELA	93	104	8164	5.9086	0.239822	0.00266072	0.00117198
111	KEGG_PATHWAY	hsa04931~Insulin resistance	7	6.79612	0.00132305	GSK3B, PTPN1, AKT1, PIK3R1, RELA, MTOR, TNFRSF1A	93	108	8164	5.68977	0.283681	0.00317533	0.00139866
112	KEGG_PATHWAY	hsa04670~Leukocyte transendothelial migration	7	6.79612	0.00174726	MMP2, PRKCA, PIK3R1, MAPK14, MMP9, PTK2, ICAM1	93	114	8164	5.3903	0.356411	0.00407694	0.0017958
113	KEGG_PATHWAY	hsa04726~Serotonergic synapse	7	6.79612	0.00182697	CASP3, PRKCA, PRKACA, PTGS2, HRAS, SLC6A4, PTGS1	93	115	8164	5.34343	0.369233	0.00419292	0.00184688
114	KEGG_PATHWAY	hsa04728~Dopaminergic synapse	7	6.79612	0.00365048	GSK3B, AKT1, PRKCA, FOS, CALM1, MAPK14, PRKACA	93	132	8164	4.65526	0.602119	0.00793035	0.00365048
115	KEGG_PATHWAY	hsa04371~Apelin signaling pathway	7	6.79612	0.00470277	NOS2, AKT1, CALM1, PRKACA, HRAS, MTOR, PIK3CG	93	139	8164	4.42082	0.695137	0.0099588	0.00470277
116	KEGG_PATHWAY	hsa04621~NOD-like receptor signaling pathway	7	6.79612	0.0174091	CASP8, HSP90AB1, STAT1, PKN1, MAPK14, RELA, BCL2L1	93	184	8164	3.33964	0.988035	0.0324971	0.0174091
117	KEGG_PATHWAY	hsa04215~Apoptosis - multiple species	6	5.82524	2.57942e-05	CASP9, CASP8, CASP3, BAX, BCL2L1, TNFRSF1A	93	32	8164	16.4597	0.00647913	8.22801e-05	3.62424e-05
118	KEGG_PATHWAY	hsa05216~Thyroid cancer	6	5.82524	5.34079e-05	CDKN1A, RXRA, BAX, PPARG, HRAS, TP53	93	37	8164	14.2354	0.013369	0.000161881	7.13048e-05
119	KEGG_PATHWAY	hsa04923~Regulation of lipolysis in adipocytes	6	5.82524	0.000466066	AKT1, ADRB2, PIK3R1, PRKACA, PTGS2, PTGS1	93	58	8164	9.0812	0.110838	0.00121081	0.000533333
120	KEGG_PATHWAY	hsa04520~Adherens junction	6	5.82524	0.00118059	PTPN1, CSNK2A1, SRC, MET, EGFR, IGF1R	93	71	8164	7.41845	0.257465	0.00286067	0.00126006
121	KEGG_PATHWAY	hsa04662~B cell receptor signaling pathway	6	5.82524	0.00224547	GSK3B, AKT1, FOS, PIK3R1, HRAS, RELA	93	82	8164	6.42329	0.432488	0.00509782	0.00224547
122	KEGG_PATHWAY	hsa04540~Gap junction	6	5.82524	0.00305817	SRC, CDK1, PRKCA, PRKACA, HRAS, EGFR	93	88	8164	5.98534	0.537838	0.00676017	0.00305817
123	KEGG_PATHWAY	hsa05323~Rheumatoid arthritis	6	5.82524	0.00388257	TGFB1, IFNG, MMP3, FOS, ICAM1, VEGFA	93	93	8164	5.66354	0.624806	0.00836246	0.00388257
124	KEGG_PATHWAY	hsa04750~Inflammatory mediator regulation of TRP channels	6	5.82524	0.00485541	SRC, PRKCA, PIK3R1, CALM1, MAPK14, PRKACA	93	98	8164	5.37459	0.706696	0.0101964	0.00485541
125	KEGG_PATHWAY	hsa04064~NF-kappa B signaling pathway	6	5.82524	0.00623796	CSNK2A1, PTGS2, RELA, BCL2L1, ICAM1, TNFRSF1A	93	104	8164	5.06452	0.793383	0.0126771	0.00623796
126	KEGG_PATHWAY	hsa04928~Parathyroid hormone synthesis, secretion and action	6	5.82524	0.00675467	CDKN1A, RXRA, PRKCA, FOS, PRKACA, EGFR	93	106	8164	4.96896	0.818763	0.0136174	0.00675467
127	KEGG_PATHWAY	hsa04152~AMPK signaling pathway	6	5.82524	0.0116209	FASN, AKT1, PPARG, PIK3R1, MTOR, IGF1R	93	121	8164	4.35297	0.94743	0.0221853	0.0116209
128	KEGG_PATHWAY	hsa04650~Natural killer cell mediated cytotoxicity	6	5.82524	0.013667	IFNG, CASP3, PRKCA, PIK3R1, HRAS, ICAM1	93	126	8164	4.18024	0.968816	0.0257022	0.013667
129	KEGG_PATHWAY	hsa04550~Signaling pathways regulating pluripotency of stem cells	6	5.82524	0.0224094	GSK3B, AKT1, PIK3R1, MAPK14, HRAS, IGF1R	93	143	8164	3.68328	0.996692	0.0409216	0.0224094
130	KEGG_PATHWAY	hsa04934~Cushing syndrome	6	5.82524	0.0303816	GSK3B, CDKN1A, CDK6, CDK2, PRKACA, EGFR	93	155	8164	3.39813	0.99958	0.054299	0.0303816
131	KEGG_PATHWAY	hsa04217~Necroptosis	6	5.82524	0.0333904	CASP8, HSP90AB1, IFNG, STAT1, BAX, TNFRSF1A	93	159	8164	3.31264	0.999808	0.0592561	0.0333904
132	KEGG_PATHWAY	hsa04310~Wnt signaling pathway	6	5.82524	0.0426006	GSK3B, MMP7, CSNK2A1, PRKCA, PRKACA, TP53	93	170	8164	3.09829	0.999983	0.0730296	0.0426006
133	KEGG_PATHWAY	hsa05144~Malaria	5	4.85437	0.00234115	IL10, TGFB1, IFNG, MET, ICAM1	93	50	8164	8.77849	0.446039	0.00526758	0.00234115
134	KEGG_PATHWAY	hsa04913~Ovarian steroidogenesis	5	4.85437	0.00251876	CYP1B1, PRKACA, PTGS2, CYP19A1, IGF1R	93	51	8164	8.60637	0.470344	0.00561706	0.00251876
135	KEGG_PATHWAY	hsa04929~GnRH secretion	5	4.85437	0.00573151	AKT1, PRKCA, PIK3R1, HRAS, ESR2	93	64	8164	6.8582	0.765076	0.0118388	0.00573151
136	KEGG_PATHWAY	hsa05321~Inflammatory bowel disease	5	4.85437	0.00605556	IL10, TGFB1, IFNG, STAT1, RELA	93	65	8164	6.75269	0.783603	0.0124065	0.00605556
137	KEGG_PATHWAY	hsa04664~Fc epsilon RI signaling pathway	5	4.85437	0.00710039	AKT1, PRKCA, PIK3R1, MAPK14, HRAS	93	68	8164	6.45478	0.833986	0.0142008	0.00710039
138	KEGG_PATHWAY	hsa04920~Adipocytokine signaling pathway	5	4.85437	0.00747351	RXRA, AKT1, RELA, MTOR, TNFRSF1A	93	69	8164	6.36123	0.848988	0.0148293	0.00747351
139	KEGG_PATHWAY	hsa04976~Bile secretion	5	4.85437	0.0178167	RXRA, ABCB1, ABCC2, PRKACA, ABCG2	93	89	8164	4.93174	0.989222	0.0330133	0.0178167
140	KEGG_PATHWAY	hsa04658~Th1 and Th2 cell differentiation	5	4.85437	0.0198792	IFNG, STAT1, FOS, MAPK14, RELA	93	92	8164	4.77092	0.993655	0.0365662	0.0198792
141	KEGG_PATHWAY	hsa05143~African trypanosomiasis	4	3.8835	0.00815847	IL10, IFNG, PRKCA, ICAM1	93	37	8164	9.49026	0.873101	0.0159375	0.00815847
142	KEGG_PATHWAY	hsa05134~Legionellosis	4	3.8835	0.0261589	CASP9, CASP8, CASP3, RELA	93	57	8164	6.16035	0.998744	0.0474248	0.0261589
143	KEGG_PATHWAY	hsa05416~Viral myocarditis	4	3.8835	0.0298685	CASP9, CASP8, CASP3, ICAM1	93	60	8164	5.85233	0.99952	0.0537632	0.0298685
144	KEGG_PATHWAY	hsa05217~Basal cell carcinoma	4	3.8835	0.0338413	GSK3B, CDKN1A, BAX, TP53	93	63	8164	5.57365	0.999829	0.0596365	0.0338413
145	KEGG_PATHWAY	hsa04720~Long-term potentiation	4	3.8835	0.0395442	PRKCA, CALM1, PRKACA, HRAS	93	67	8164	5.24089	0.999962	0.0692023	0.0395442
146	KEGG_PATHWAY	hsa05031~Amphetamine addiction	4	3.8835	0.0425674	PRKCA, FOS, CALM1, PRKACA	93	69	8164	5.08898	0.999983	0.0730296	0.0425674
147	KEGG_PATHWAY	hsa04924~Renin secretion	4	3.8835	0.0425674	PDE3A, ADRB2, CALM1, PRKACA	93	69	8164	5.08898	0.999983	0.0730296	0.0425674
148	KEGG_PATHWAY	hsa01523~Antifolate resistance	3	2.91262	0.0445529	ABCC2, RELA, ABCG2	93	30	8164	8.77849	0.99999	0.0758604	0.0445529
